# Supplementary material for: Modelling premature cardiac aging with induced pluripotent stem cells from a hutchinson-gilford Progeria Syndrome patient
Source: Front Physiol. 2022 Nov 23;13:1007418. doi: 10.3389/fphys.2022.1007418 (PMC9726722; doi:10.3389/fphys.2022.1007418)
Supplement: Supplementary file 1 [file Table2.XLSX]

## Sheet: Proteins
Supplementary Table 1. Identified proteins in iPS derived cardiomyocytes by LC-MS/MS
Accession	Description	Exp. q-value	Sum PEP Score	Coverage	# Peptides	# PSMs	# Unique Peptides	# Protein Groups	# AAs	MW [kDa]	Score Sequest HT	# Peptides Sequest HT	calc. pI	CM_Control	CM-Prog
O14639	Actin-binding LIM protein 1 OS=Homo sapiens GN=ABLIM1 PE=1 SV=3	0	4	3	2	4	2	1	778	87,631	2	2	8,59	found	not found
Q4G176	Acyl-CoA synthetase family member 3, mitochondrial OS=Homo sapiens GN=ACSF3 PE=1 SV=3	0	4	3	2	5	2	1	576	64,089	3	2	8,37	found	not found
Q9NPJ3	Acyl-coenzyme A thioesterase 13 OS=Homo sapiens GN=ACOT13 PE=1 SV=1	0	4	15	2	3	2	1	140	14,951	1	2	9,14	found	not found
P46063	ATP-dependent DNA helicase Q1 OS=Homo sapiens GN=RECQL PE=1 SV=3	0	10	5	4	5	4	1	649	73,41	1	4	7,88	found	not found
P04040	Catalase OS=Homo sapiens GN=CAT PE=1 SV=3	0,00358521787093216	2	1	1	3	1	1	527	59,719	3	1	7,39	found	not found
Q9NZ45	CDGSH iron-sulfur domain-containing protein 1 OS=Homo sapiens GN=CISD1 PE=1 SV=1	0	9	44	4	5	4	1	108	12,191	0	4	9,09	found	not found
P0CG36	Cryptic family protein 1B OS=Homo sapiens GN=CFC1B PE=3 SV=1	0,000656167979002625	3	4	1	3	1	1	223	24,626	2	1	8,63	found	not found
P20674	Cytochrome c oxidase subunit 5A, mitochondrial OS=Homo sapiens GN=COX5A PE=1 SV=2	0,00735853844201979	2	5	1	3	1	1	150	16,752	1	1	6,79	found	not found
P05413	Fatty acid-binding protein, heart OS=Homo sapiens GN=FABP3 PE=1 SV=4	0,000656167979002625	3	6	1	3	1	1	133	14,849	5	1	6,8	found	not found
P29992	Guanine nucleotide-binding protein subunit alpha-11 OS=Homo sapiens GN=GNA11 PE=1 SV=2	0	5	6	2	4	1	1	359	42,097	0	2	5,69	found	not found
Q9H583	HEAT repeat-containing protein 1 OS=Homo sapiens GN=HEATR1 PE=1 SV=3	0,000656167979002625	3	0,466417910447761	1	3	1	1	2144	242,215	5	1	6,54	found	not found
P02042	Hemoglobin subunit delta OS=Homo sapiens GN=HBD PE=1 SV=2	0,00358521787093216	2	6	1	3	1	1	147	16,045	0	1	8,05	found	not found
P51570-2	Isoform 2 of Galactokinase OS=Homo sapiens GN=GALK1	0	5	4	2	3	2	1	422	45,329	4	2	6,68	found	not found
Q9UBY9-2	Isoform 2 of Heat shock protein beta-7 OS=Homo sapiens GN=HSPB7	0,00715197956577267	2	4	1	4	1	1	175	19,076	0	1	6,61	found	not found
P05166-2	Isoform 2 of Propionyl-CoA carboxylase beta chain, mitochondrial OS=Homo sapiens GN=PCCB	0,000656167979002625	3	2	1	3	1	1	559	60,483	4	1	7,24	found	not found
P54619-3	Isoform 3 of 5'-AMP-activated protein kinase subunit gamma-1 OS=Homo sapiens GN=PRKAG1	0,00358521787093216	2	2	1	3	1	1	340	38,508	1	1	7,09	found	not found
P48061-4	Isoform Delta of Stromal cell-derived factor 1 OS=Homo sapiens GN=CXCL12	0,000656167979002625	3	5	1	3	1	1	140	15,485	5	1	9,66	found	not found
Q9Y2P4	Long-chain fatty acid transport protein 6 OS=Homo sapiens GN=SLC27A6 PE=2 SV=1	0,00715197956577267	2	1,2924071082391	1	3	1	1	619	70,067	3	1	8,51	found	not found
Q5EB52	Mesoderm-specific transcript homolog protein OS=Homo sapiens GN=MEST PE=2 SV=2	0,000656167979002625	3	5	1	3	1	1	335	38,806	0	1	9,74	found	not found
Q03426	Mevalonate kinase OS=Homo sapiens GN=MVK PE=1 SV=1	0,000656167979002625	3	3	1	3	1	1	396	42,424	7	1	6,46	found	not found
P10916	Myosin regulatory light chain 2, ventricular/cardiac muscle isoform OS=Homo sapiens GN=MYL2 PE=1 SV=3	0,00358521787093216	2	5	1	3	1	1	166	18,777	0	1	5	found	not found
P19404	NADH dehydrogenase [ubiquinone] flavoprotein 2, mitochondrial OS=Homo sapiens GN=NDUFV2 PE=1 SV=2	0,00358521787093216	2	5	1	3	1	1	249	27,374	0	1	8,06	found	not found
Q9H307	Pinin OS=Homo sapiens GN=PNN PE=1 SV=4	0	4	1	1	4	1	1	717	81,565	4	1	7,14	found	not found
P06703	Protein S100-A6 OS=Homo sapiens GN=S100A6 PE=1 SV=1	0,00358521787093216	2	8	1	3	1	1	90	10,173	4	1	5,48	found	not found
P11498	Pyruvate carboxylase, mitochondrial OS=Homo sapiens GN=PC PE=1 SV=2	0,00674974039460021	2	1	1	3	1	1	1178	129,551	3	1	6,84	found	not found
A6NHR9	Structural maintenance of chromosomes flexible hinge domain-containing protein 1 OS=Homo sapiens GN=SMCHD1 PE=1 SV=2	0,00760649087221095	2	0,698254364089776	1	3	1	1	2005	226,231	0	1	7,3	found	not found
O95425	Supervillin OS=Homo sapiens GN=SVIL PE=1 SV=2	0	4	1,5356820234869	2	3	2	1	2214	247,593	2	2	6,98	found	not found
Q13190	Syntaxin-5 OS=Homo sapiens GN=STX5 PE=1 SV=2	0,00348432055749129	3	7	1	3	1	1	355	39,648	0	1	9,16	found	not found
Q9Y2Z9	Ubiquinone biosynthesis monooxygenase COQ6, mitochondrial OS=Homo sapiens GN=COQ6 PE=1 SV=2	0,00715197956577267	2	1	1	3	1	1	468	50,838	1	1	7,3	found	not found
O75348	V-type proton ATPase subunit G 1 OS=Homo sapiens GN=ATP6V1G1 PE=1 SV=3	0,00358521787093216	2	11,864406779661	1	3	1	1	118	13,749	4	1	8,79	found	not found
Q9Y4F1-2	Isoform 2 of FERM, RhoGEF and pleckstrin domain-containing protein 1 OS=Homo sapiens GN=FARP1	0,011177347242921	2	1	1	3	1	1	1076	122,037	0	1	8,48	found	not found
O95140	Mitofusin-2 OS=Homo sapiens GN=MFN2 PE=1 SV=3	0,0138855054811206	2	1	1	3	1	1	757	86,347	3	1	6,98	found	not found
Q9Y3B7	39S ribosomal protein L11, mitochondrial OS=Homo sapiens GN=MRPL11 PE=1 SV=1	0,00674974039460021	2	4,6875	1	4	1	1	192	20,67	0	1	9,91	found	not found
P52815	39S ribosomal protein L12, mitochondrial OS=Homo sapiens GN=MRPL12 PE=1 SV=2	0	3	12	1	4	1	1	198	21,335	3	1	8,87	found	not found
Q99653	Calcineurin B homologous protein 1 OS=Homo sapiens GN=CHP1 PE=1 SV=3	0,000656167979002625	3	5	1	4	1	1	195	22,442	6,9128589630127	1	5,1	found	not found
Q8N6M3	Fat storage-inducing transmembrane protein 2 OS=Homo sapiens GN=FITM2 PE=2 SV=1	0,000656167979002625	3	6	1	4	1	1	262	29,835	4	1	8,65	found	not found
Q6NTF9-2	Isoform 2 of Rhomboid domain-containing protein 2 OS=Homo sapiens GN=RHBDD2	0,00358521787093216	2	1,9559902200489	1	4	1	1	409	43,77	5	1	9,22	found	not found
P52179	Myomesin-1 OS=Homo sapiens GN=MYOM1 PE=1 SV=2	0	8	2	3	4	3	1	1685	187,509	4	3	6,93	found	not found
P17568	NADH dehydrogenase [ubiquinone] 1 beta subcomplex subunit 7 OS=Homo sapiens GN=NDUFB7 PE=1 SV=4	0	5	13	2	4	2	1	137	16,391	7	2	8,92	found	not found
P03915	NADH-ubiquinone oxidoreductase chain 5 OS=Homo sapiens GN=MT-ND5 PE=1 SV=2	0	5	6	2	5	2	1	603	66,982	0	2	9,03	found	not found
P48681	Nestin OS=Homo sapiens GN=NES PE=1 SV=2	0	10	2	3	5	3	1	1621	177,332	9	3	4,36	found	not found
P13591	Neural cell adhesion molecule 1 OS=Homo sapiens GN=NCAM1 PE=1 SV=3	0	6	2	2	5	2	1	858	94,515	0	2	4,87	found	not found
Q9HBU9	Popeye domain-containing protein 2 OS=Homo sapiens GN=POPDC2 PE=2 SV=2	0,00358521787093216	2,8965383779053	3	1	4	1	1	364	40,421	1	1	5,36	found	not found
Q9UN86	Ras GTPase-activating protein-binding protein 2 OS=Homo sapiens GN=G3BP2 PE=1 SV=2	0,000656167979002625	3	2	1	4	1	1	482	54,088	2	1	5,55	found	not found
Q9NRX5	Serine incorporator 1 OS=Homo sapiens GN=SERINC1 PE=1 SV=1	0,000656167979002625	3	2	1	4	1	1	453	50,461	8	1	5,85	found	not found
Q9Y4G6	Talin-2 OS=Homo sapiens GN=TLN2 PE=1 SV=4	0	6	1	2	5	2	1	2542	271,443	9	2	5,57	found	not found
O60783	28S ribosomal protein S14, mitochondrial OS=Homo sapiens GN=MRPS14 PE=1 SV=1	0,000656167979002625	3	10,15625	1	5	1	1	128	15,129	8	1	11,41	found	not found
P13807	Glycogen [starch] synthase, muscle OS=Homo sapiens GN=GYS1 PE=1 SV=2	0,000656167979002625	3	3	1	5	1	1	737	83,732	4	1	6,18	found	not found
Q13813-2	Isoform 2 of Spectrin alpha chain, non-erythrocytic 1 OS=Homo sapiens GN=SPTAN1	0	13,029266339995	2	5	9	5	1	2477	284,919	10	5	5,35	found	not found
P27694	Replication protein A 70 kDa DNA-binding subunit OS=Homo sapiens GN=RPA1 PE=1 SV=2	0	3	1	1	5	1	1	616	68,095	0	1	7,21	found	not found
Q9UI47	Catenin alpha-3 OS=Homo sapiens GN=CTNNA3 PE=1 SV=2	0	12	9	4	10	4	1	895	99,746	19	4	6,16	found	not found
Q7L2H7	Eukaryotic translation initiation factor 3 subunit M OS=Homo sapiens GN=EIF3M PE=1 SV=1	0	3	7,2192513368984	1	6	1	1	374	42,476	0	1	5,63	found	not found
P06756	Integrin alpha-V OS=Homo sapiens GN=ITGAV PE=1 SV=2	0	11	3	4	7	4	1	1048	115,964	10	4	5,68	found	not found
Q5VST9-2	Isoform 2 of Obscurin OS=Homo sapiens GN=OBSCN	0	24	1,5183837369808	8	19	8	1	7969	868,027	31	8	5,99	found	not found
P14618-2	Isoform M1 of Pyruvate kinase PKM OS=Homo sapiens GN=PKM	0	74	52,165725047081	22	198	2	1	531	58,025	213	22	7,71	found	not found
Q92621	Nuclear pore complex protein Nup205 OS=Homo sapiens GN=NUP205 PE=1 SV=3	0	19	4	4	13	4	1	2012	227,776	28	4	6,19	found	not found
Q9BYV6	Tripartite motif-containing protein 55 OS=Homo sapiens GN=TRIM55 PE=1 SV=2	0	15	8	4	9	4	1	548	60,427	13	4	4,77	found	not found
P42766	60S ribosomal protein L35 OS=Homo sapiens GN=RPL35 PE=1 SV=2	0	5	16,260162601626	2	4	2	1	123	14,543	4	2	11,05	found	found
Q8N3C0	Activating signal cointegrator 1 complex subunit 3 OS=Homo sapiens GN=ASCC3 PE=1 SV=3	0	6	1	2	5	2	1	2202	251,301	7,0684380531311	2	7,09	found	found
P54819	Adenylate kinase 2, mitochondrial OS=Homo sapiens GN=AK2 PE=1 SV=2	0	9	8	2	5	2	1	239	26,461	10	2	7,81	found	found
P40616	ADP-ribosylation factor-like protein 1 OS=Homo sapiens GN=ARL1 PE=1 SV=1	0	6	18,232044198895	2	4	2	1	181	20,404	5	2	5,72	found	found
O43488	Aflatoxin B1 aldehyde reductase member 2 OS=Homo sapiens GN=AKR7A2 PE=1 SV=3	0	5,7839856652125	6	2	4	2	1	359	39,564	6	2	7,17	found	found
P14550	Alcohol dehydrogenase [NADP(+)] OS=Homo sapiens GN=AKR1A1 PE=1 SV=3	0	16	23	5	10	5	1	325	36,55	13	5	6,79	found	found
P61221	ATP-binding cassette sub-family E member 1 OS=Homo sapiens GN=ABCE1 PE=1 SV=1	0	9	4	3	4	3	1	599	67,271	2	3	8,34	found	found
P80723	Brain acid soluble protein 1 OS=Homo sapiens GN=BASP1 PE=1 SV=2	0	20	29	4	11	4	1	227	22,68	16	4	4,63	found	found
Q99439	Calponin-2 OS=Homo sapiens GN=CNN2 PE=1 SV=4	0	6	10	3	6	3	1	309	33,675	0	3	7,33	found	found
Q9Y696	Chloride intracellular channel protein 4 OS=Homo sapiens GN=CLIC4 PE=1 SV=4	0	3	5	2	4	2	1	253	28,754	0	2	5,59	found	found
P61962	DDB1- and CUL4-associated factor 7 OS=Homo sapiens GN=DCAF7 PE=1 SV=1	0	5	4	2	5	2	1	342	38,901	6	2	5,52	found	found
P16422	Epithelial cell adhesion molecule OS=Homo sapiens GN=EPCAM PE=1 SV=2	0	6	7	2	6	2	1	314	34,91	3	2	7,46	found	found
Q8WVV9	Heterogeneous nuclear ribonucleoprotein L-like OS=Homo sapiens GN=HNRNPLL PE=1 SV=1	0	10	7	3	13	2	1	542	60,045	14	3	7,72	found	found
O15347	High mobility group protein B3 OS=Homo sapiens GN=HMGB3 PE=1 SV=4	0	12,419297073031	21	4	11	4	1	200	22,965	1	4	8,37	found	found
Q9H857-2	Isoform 2 of 5'-nucleotidase domain-containing protein 2 OS=Homo sapiens GN=NT5DC2	0	8	9	4	7	4	1	557	64,103	0	4	7,74	found	found
Q15717-2	Isoform 2 of ELAV-like protein 1 OS=Homo sapiens GN=ELAVL1	0	7	9	3	6	3	1	353	38,972	0	3	9,45	found	found
P29692-2	Isoform 2 of Elongation factor 1-delta OS=Homo sapiens GN=EEF1D	0	8	5	3	8	3	1	647	71,364	1	3	6,42	found	found
Q14318-2	Isoform 2 of Peptidyl-prolyl cis-trans isomerase FKBP8 OS=Homo sapiens GN=FKBP8	0,00358521787093216	2	1	1	4	1	1	413	44,621	3	1	4,84	found	found
Q12765-2	Isoform 2 of Secernin-1 OS=Homo sapiens GN=SCRN1	0	5	5	2	6	2	1	434	48,683	1	2	4,78	found	found
P55265-4	Isoform 4 of Double-stranded RNA-specific adenosine deaminase OS=Homo sapiens GN=ADAR	0	4	2	2	5	2	1	1269	140,749	0	2	8,56	found	found
Q86X76-3	Isoform 4 of Nitrilase homolog 1 OS=Homo sapiens GN=NIT1	0	4	4	2	5	2	1	367	40,174	10	2	6,9	found	found
P62070-4	Isoform 4 of Ras-related protein R-Ras2 OS=Homo sapiens GN=RRAS2	0	11	20	4	10	2	1	210	24,18	8	4	6,01	found	found
Q07812-2	Isoform Beta of Apoptosis regulator BAX OS=Homo sapiens GN=BAX	0	8,7317068764222	14	3	7	3	1	218	24,204	4	3	7,9	found	found
Q9NSE4	Isoleucine--tRNA ligase, mitochondrial OS=Homo sapiens GN=IARS2 PE=1 SV=2	0	14	6	5	7	5	1	1012	113,719	1	5	7,2	found	found
Q86UP2	Kinectin OS=Homo sapiens GN=KTN1 PE=1 SV=1	0	7	2,8002947678703	3	8	3	1	1357	156,179	4,7992889881134	3	5,64	found	found
Q01650	Large neutral amino acids transporter small subunit 1 OS=Homo sapiens GN=SLC7A5 PE=1 SV=2	0,000656167979002625	3	2	1	4	1	1	507	54,974	9	1	7,72	found	found
Q12769	Nuclear pore complex protein Nup160 OS=Homo sapiens GN=NUP160 PE=1 SV=3	0	7	3,2033426183844	2	4	2	1	1436	162,017	2	2	5,5	found	found
Q9NSD9	Phenylalanine--tRNA ligase beta subunit OS=Homo sapiens GN=FARSB PE=1 SV=3	0	7	7	3	4	3	1	589	66,074	3	3	6,84	found	found
Q9Y5J5	Pleckstrin homology-like domain family A member 3 OS=Homo sapiens GN=PHLDA3 PE=1 SV=1	0,000656167979002625	3	7,8740157480315	1	4	1	1	127	13,882	6	1	9,67	found	found
O60831	PRA1 family protein 2 OS=Homo sapiens GN=PRAF2 PE=1 SV=1	0,00348432055749129	3	6	1	4	1	1	178	19,246	1	1	9,19	found	found
Q9UHG3	Prenylcysteine oxidase 1 OS=Homo sapiens GN=PCYOX1 PE=1 SV=3	0,000656167979002625	3	2	1	4	1	1	505	56,604	3	1	6,18	found	found
P55786	Puromycin-sensitive aminopeptidase OS=Homo sapiens GN=NPEPPS PE=1 SV=2	0	8	2	2	5	2	1	919	103,211	4	2	5,72	found	found
A8MWD9	Putative small nuclear ribonucleoprotein G-like protein 15 OS=Homo sapiens GN=SNRPGP15 PE=5 SV=2	0	3	15	1	4	1	1	76	8,538	7	1	8,84	found	found
Q8NCN5	Pyruvate dehydrogenase phosphatase regulatory subunit, mitochondrial OS=Homo sapiens GN=PDPR PE=1 SV=2	0	6	4	2	5	2	1	879	99,301	14	2	6,35	found	found
Q08257	Quinone oxidoreductase OS=Homo sapiens GN=CRYZ PE=1 SV=1	0	10	15	4	6	4	1	329	35,185	5	4	8,44	found	found
Q9H7B2	Ribosome production factor 2 homolog OS=Homo sapiens GN=RPF2 PE=1 SV=2	0	5	9	2	4	2	1	306	35,56	3	2	9,99	found	found
Q96PK6	RNA-binding protein 14 OS=Homo sapiens GN=RBM14 PE=1 SV=2	0	11	5	3	5	3	1	669	69,449	6	3	9,67	found	found
P49756	RNA-binding protein 25 OS=Homo sapiens GN=RBM25 PE=1 SV=3	0	5,5933198460217	4	2	4	2	1	843	100,124	8	2	6,32	found	found
Q15287	RNA-binding protein with serine-rich domain 1 OS=Homo sapiens GN=RNPS1 PE=1 SV=1	0	5,041709105757	7	2	6	2	1	305	34,188	0	2	11,84	found	found
Q5JTH9	RRP12-like protein OS=Homo sapiens GN=RRP12 PE=1 SV=2	0	5	2	2	5	2	1	1297	143,611	5	2	8,75	found	found
Q9BWM7	Sideroflexin-3 OS=Homo sapiens GN=SFXN3 PE=1 SV=3	0	6	5	2	5	1	1	321	35,481	4	2	9,1	found	found
Q13148	TAR DNA-binding protein 43 OS=Homo sapiens GN=TARDBP PE=1 SV=1	0	8	12,56038647343	3	5	3	1	414	44,711	0	3	6,19	found	found
Q9NXF1	Testis-expressed protein 10 OS=Homo sapiens GN=TEX10 PE=1 SV=2	0	5	4	2	4	2	1	929	105,608	8	2	9,36	found	found
P13693	Translationally-controlled tumor protein OS=Homo sapiens GN=TPT1 PE=1 SV=1	0	6	17	3	4	3	1	172	19,583	1	3	4,93	found	found
Q99805	Transmembrane 9 superfamily member 2 OS=Homo sapiens GN=TM9SF2 PE=1 SV=1	0	4	3	2	4	2	1	663	75,725	1,900146484375	2	7,44	found	found
P23381	Tryptophan--tRNA ligase, cytoplasmic OS=Homo sapiens GN=WARS PE=1 SV=2	0	8	8	3	6	3	1	471	53,132	10	3	6,23	found	found
Q9Y4Z0	U6 snRNA-associated Sm-like protein LSm4 OS=Homo sapiens GN=LSM4 PE=1 SV=1	0	3	10	2	5	2	1	139	15,34	1	2	9,99	found	found
P04004	Vitronectin OS=Homo sapiens GN=VTN PE=1 SV=1	0	11	11	4	6	4	1	478	54,271	1	4	5,8	found	found
P61981	14-3-3 protein gamma OS=Homo sapiens GN=YWHAG PE=1 SV=2	0	11	15	4	10	3	1	247	28,285	1	4	4,89	found	found
P62750	60S ribosomal protein L23a OS=Homo sapiens GN=RPL23A PE=1 SV=1	0	8	22	3	9	3	1	156	17,684	4	3	10,45	found	found
Q92688	Acidic leucine-rich nuclear phosphoprotein 32 family member B OS=Homo sapiens GN=ANP32B PE=1 SV=1	0	6	9	2	9	1	1	251	28,77	14	2	4,06	found	found
Q9NYF8	Bcl-2-associated transcription factor 1 OS=Homo sapiens GN=BCLAF1 PE=1 SV=2	0	8	3	3	6	3	1	920	106,059	5	3	9,98	found	found
P11717	Cation-independent mannose-6-phosphate receptor OS=Homo sapiens GN=IGF2R PE=1 SV=3	0	5	0,802890405459655	2	5	2	1	2491	274,199	1	2	5,94	found	found
Q3SXM5	Inactive hydroxysteroid dehydrogenase-like protein 1 OS=Homo sapiens GN=HSDL1 PE=1 SV=3	0	9	14	3	7	3	1	330	36,978	3	3	8,72	found	found
Q13724	Mannosyl-oligosaccharide glucosidase OS=Homo sapiens GN=MOGS PE=1 SV=5	0	10	6	3	7	3	1	837	91,861	5	3	8,9	found	found
Q9NTK5	Obg-like ATPase 1 OS=Homo sapiens GN=OLA1 PE=1 SV=2	0,00651041666666667	2	1	1	5	1	1	396	44,715	3	1	7,81	found	found
P35637	RNA-binding protein FUS OS=Homo sapiens GN=FUS PE=1 SV=1	0	11	8	4	10	4	1	526	53,394	4	4	9,36	found	found
Q15393	Splicing factor 3B subunit 3 OS=Homo sapiens GN=SF3B3 PE=1 SV=4	0	4	1	2	5	2	1	1217	135,492	6	2	5,26	found	found
Q9BTV4	Transmembrane protein 43 OS=Homo sapiens GN=TMEM43 PE=1 SV=1	0	8	9	3	6	3	1	400	44,847	4	3	8,13	found	found
P08708	40S ribosomal protein S17 OS=Homo sapiens GN=RPS17 PE=1 SV=2	0	7	15	2	10	2	1	135	15,54	6	2	9,85	found	found
P18085	ADP-ribosylation factor 4 OS=Homo sapiens GN=ARF4 PE=1 SV=3	0	15,365228785244	40	5	20	3	1	180	20,498	15	5	7,14	found	found
Q9UBC3	DNA (cytosine-5)-methyltransferase 3B OS=Homo sapiens GN=DNMT3B PE=1 SV=1	0	5	2	2	7	2	1	853	95,69	11	2	8,43	found	found
P15170-3	Isoform 3 of Eukaryotic peptide chain release factor GTP-binding subunit ERF3A OS=Homo sapiens GN=GSPT1	0	5	2	2	7	2	1	637	68,656	10	2	5,33	found	found
P13646	Keratin, type I cytoskeletal 13 OS=Homo sapiens GN=KRT13 PE=1 SV=4	0	27	22	10	47	5	1	458	49,557	35	10	4,96	found	found
P49006	MARCKS-related protein OS=Homo sapiens GN=MARCKSL1 PE=1 SV=2	0,00358521787093216	2	6	1	6	1	1	195	19,517	1	1	4,67	found	found
P16435	NADPH--cytochrome P450 reductase OS=Homo sapiens GN=POR PE=1 SV=2	0	7	4	3	7	3	1	677	76,641	8	3	5,58	found	found
P55209	Nucleosome assembly protein 1-like 1 OS=Homo sapiens GN=NAP1L1 PE=1 SV=1	0	8	11	3	11	2	1	391	45,346	5	3	4,46	found	found
P62318	Small nuclear ribonucleoprotein Sm D3 OS=Homo sapiens GN=SNRPD3 PE=1 SV=1	0,000656167979002625	3	7	1	6	1	1	126	13,907	3	1	10,32	found	found
P29762	Cellular retinoic acid-binding protein 1 OS=Homo sapiens GN=CRABP1 PE=1 SV=2	0	11	32	4	9	4	1	137	15,556	5	4	5,38	found	found
P14406	Cytochrome c oxidase subunit 7A2, mitochondrial OS=Homo sapiens GN=COX7A2 PE=1 SV=1	0	8	56	3	9	3	1	83	9,39	1	3	9,76	found	found
P61803	Dolichyl-diphosphooligosaccharide--protein glycosyltransferase subunit DAD1 OS=Homo sapiens GN=DAD1 PE=1 SV=3	0	5	19	2	9	2	1	113	12,489	12	2	7,08	found	found
O15371	Eukaryotic translation initiation factor 3 subunit D OS=Homo sapiens GN=EIF3D PE=1 SV=1	0	7	6	3	9	3	1	548	63,932	1	3	6,05	found	found
Q92769	Histone deacetylase 2 OS=Homo sapiens GN=HDAC2 PE=1 SV=2	0	7	7	3	7	3	1	488	55,329	1,6273649930954	3	5,91	found	found
P11388-4	Isoform 4 of DNA topoisomerase 2-alpha OS=Homo sapiens GN=TOP2A	0	14	4	7	14	5	1	1612	182,567	1	7	8,63	found	found
Q15758	Neutral amino acid transporter B(0) OS=Homo sapiens GN=SLC1A5 PE=1 SV=2	0	13	8	4	11	4	1	541	56,562	13	4	5,48	found	found
P12004	Proliferating cell nuclear antigen OS=Homo sapiens GN=PCNA PE=1 SV=1	0	5	8	2	7	2	1	261	28,75	0	2	4,69	found	found
P84103	Serine/arginine-rich splicing factor 3 OS=Homo sapiens GN=SRSF3 PE=1 SV=1	0	10	23	4	26	3	1	164	19,318	10	4	11,65	found	found
P62910	60S ribosomal protein L32 OS=Homo sapiens GN=RPL32 PE=1 SV=2	0	6	17,037037037037	2	9	2	1	135	15,85	1	2	11,33	found	found
P22392-2	Isoform 3 of Nucleoside diphosphate kinase B OS=Homo sapiens GN=NME2	0	11	19	3	16	3	1	267	30,118	14	3	8,92	found	found
O14950	Myosin regulatory light chain 12B OS=Homo sapiens GN=MYL12B PE=1 SV=2	0	12	23	4	16	4	1	172	19,767	9	4	4,84	found	found
P13667	Protein disulfide-isomerase A4 OS=Homo sapiens GN=PDIA4 PE=1 SV=2	0	35	18	11	35	11	1	645	72,887	39,730956196785	11	5,07	found	found
O00264	Membrane-associated progesterone receptor component 1 OS=Homo sapiens GN=PGRMC1 PE=1 SV=3	0	6	11	2	15	2	1	195	21,658	1	2	4,7	found	found
Q9UBW7	Zinc finger MYM-type protein 2 OS=Homo sapiens GN=ZMYM2 PE=1 SV=1	0,000656167979002625	3	0,65359477124183	1	4	1	1	1377	154,81	5	1	6,34	found	found
Q15029	116 kDa U5 small nuclear ribonucleoprotein component OS=Homo sapiens GN=EFTUD2 PE=1 SV=1	0	13	5	5	21	4	1	972	109,366	8,8880797624588	5	5	found	found
P31946	14-3-3 protein beta/alpha OS=Homo sapiens GN=YWHAB PE=1 SV=3	0	24	17	5	29	2	1	246	28,065	26	5	4,83	found	found
Q99943	1-acyl-sn-glycerol-3-phosphate acyltransferase alpha OS=Homo sapiens GN=AGPAT1 PE=1 SV=2	0,000656167979002625	3	3	1	5	1	1	283	31,696	8	1	9,38	found	found
P63220	40S ribosomal protein S21 OS=Homo sapiens GN=RPS21 PE=1 SV=1	0,00358521787093216	2	10	1	5	1	1	83	9,106	0	1	8,5	found	found
P22090	40S ribosomal protein S4, Y isoform 1 OS=Homo sapiens GN=RPS4Y1 PE=1 SV=2	0	22	23,574144486692	7	28	3	1	263	29,437	36	7	10,24	found	found
P50895	Basal cell adhesion molecule OS=Homo sapiens GN=BCAM PE=1 SV=2	0,000656167979002625	3	1	1	5	1	1	628	67,363	5	1	5,81	found	found
Q562R1	Beta-actin-like protein 2 OS=Homo sapiens GN=ACTBL2 PE=1 SV=2	0	55	36	13	159	3	1	376	41,976	322	13	5,59	found	found
O43169	Cytochrome b5 type B OS=Homo sapiens GN=CYB5B PE=1 SV=2	0	5	27	2	5	2	1	146	16,322	3	2	4,97	found	found
Q9HAV4	Exportin-5 OS=Homo sapiens GN=XPO5 PE=1 SV=1	0	9	3	3	7	3	1	1204	136,222	8	3	5,8	found	found
O00461	Golgi integral membrane protein 4 OS=Homo sapiens GN=GOLIM4 PE=1 SV=1	0	4	2	2	6	2	1	696	81,831	3	2	4,77	found	found
Q96P70	Importin-9 OS=Homo sapiens GN=IPO9 PE=1 SV=3	0	13,083430955711	5	3	9	3	1	1041	115,889	20	3	4,81	found	found
Q15370-2	Isoform 2 of Elongin-B OS=Homo sapiens GN=ELOB	0,00358521787093216	2	4	1	5	1	1	161	17,9	0	1	6,1	found	found
Q9P0J0-2	Isoform 2 of NADH dehydrogenase [ubiquinone] 1 alpha subcomplex subunit 13 OS=Homo sapiens GN=NDUFA13	0	4	9	2	5	2	1	222	24,866	1	2	9,7	found	found
Q9NRP0-2	Isoform 2 of Oligosaccharyltransferase complex subunit OSTC OS=Homo sapiens GN=OSTC	0	3	7	1	5	1	1	171	19,158	9	1	9,19	found	found
Q7Z3D6-2	Isoform 2 of UPF0317 protein C14orf159, mitochondrial OS=Homo sapiens GN=C14orf159	0	9	6	4	6	4	1	621	66,884	3	4	6,87	found	found
P18621-3	Isoform 3 of 60S ribosomal protein L17 OS=Homo sapiens GN=RPL17	0,00358521787093216	3	3	1	5	1	1	228	26,356	1	1	10,1	found	found
P02774-3	Isoform 3 of Vitamin D-binding protein OS=Homo sapiens GN=GC	0,00358521787093216	2	1	1	5	1	1	493	55,087	4	1	5,74	found	found
P51610-4	Isoform 4 of Host cell factor 1 OS=Homo sapiens GN=HCFC1	0	10	2	4	5	4	1	2079	213,272	5,955033659935	4	7,33	found	found
Q96T76-8	Isoform 5 of MMS19 nucleotide excision repair protein homolog OS=Homo sapiens GN=MMS19	0,00589970501474926	2	0,761179828734539	1	5	1	1	1051	115,631	5	1	6,52	found	found
O94979-8	Isoform 8 of Protein transport protein Sec31A OS=Homo sapiens GN=SEC31A	0	11	4	4	9	4	1	1233	134,415	3,6890971660614	4	6,73	found	found
P17096-2	Isoform HMG-Y of High mobility group protein HMG-I/HMG-Y OS=Homo sapiens GN=HMGA1	0	6,455884185884	14	2	10	1	1	96	10,673	17	2	10,32	found	found
Q15334	Lethal(2) giant larvae protein homolog 1 OS=Homo sapiens GN=LLGL1 PE=1 SV=3	0,00358521787093216	2	0,845864661654135	1	5	1	1	1064	115,346	8	1	6,29	found	found
P35625	Metalloproteinase inhibitor 3 OS=Homo sapiens GN=TIMP3 PE=1 SV=2	0,000656167979002625	3	5	1	5	1	1	211	24,129	1	1	8,72	found	found
Q9P032	NADH dehydrogenase [ubiquinone] 1 alpha subcomplex assembly factor 4 OS=Homo sapiens GN=NDUFAF4 PE=1 SV=1	0,00589970501474926	2,4721124340473	5	1	5	1	1	175	20,254	3	1	8,82	found	found
Q15274	Nicotinate-nucleotide pyrophosphorylase [carboxylating] OS=Homo sapiens GN=QPRT PE=1 SV=3	0	5	8	2	5	2	1	297	30,826	10	2	6,21	found	found
O14744	Protein arginine N-methyltransferase 5 OS=Homo sapiens GN=PRMT5 PE=1 SV=4	0	4,5390868294734	2	2	6	2	1	637	72,638	0	2	6,29	found	found
Q9BWF3	RNA-binding protein 4 OS=Homo sapiens GN=RBM4 PE=1 SV=1	0	6	6	3	9	3	1	364	40,289	9	3	7,08	found	found
Q99720	Sigma non-opioid intracellular receptor 1 OS=Homo sapiens GN=SIGMAR1 PE=1 SV=1	0,00358521787093216	2	3	1	5	1	1	223	25,112	7	1	5,96	found	found
Q9NY59	Sphingomyelin phosphodiesterase 3 OS=Homo sapiens GN=SMPD3 PE=1 SV=1	0,00358521787093216	2	1,6793893129771	1	5	1	1	655	71,036	0	1	5,78	found	found
P09493	Tropomyosin alpha-1 chain OS=Homo sapiens GN=TPM1 PE=1 SV=2	0	12	11	3	6	3	1	284	32,689	7,2802494764328	3	4,74	found	found
Q8IY81	pre-rRNA processing protein FTSJ3 OS=Homo sapiens GN=FTSJ3 PE=1 SV=2	0,0147807123818755	1	0,826446280991736	1	5	1	1	847	96,499	1	1	8,4	found	found
P62191	26S protease regulatory subunit 4 OS=Homo sapiens GN=PSMC1 PE=1 SV=1	0	7	9	3	7	2	1	440	49,154	3	3	6,21	found	found
P46778	60S ribosomal protein L21 OS=Homo sapiens GN=RPL21 PE=1 SV=2	0,00348432055749129	3	6,875	1	6	1	1	160	18,553	7	1	10,49	found	found
P83731	60S ribosomal protein L24 OS=Homo sapiens GN=RPL24 PE=1 SV=1	0	9,7443366116519	24	4	8	4	1	157	17,768	3	4	11,25	found	found
Q6NUK1	Calcium-binding mitochondrial carrier protein SCaMC-1 OS=Homo sapiens GN=SLC25A24 PE=1 SV=2	0	10	10,482180293501	5	7	5	1	477	53,32	1,6606342792511	5	6,33	found	found
Q14019	Coactosin-like protein OS=Homo sapiens GN=COTL1 PE=1 SV=3	0,00358521787093216	2	6	1	6	1	1	142	15,935	5	1	5,67	found	found
Q14152	Eukaryotic translation initiation factor 3 subunit A OS=Homo sapiens GN=EIF3A PE=1 SV=1	0	15	4	6	11	6	1	1382	166,468	1	6	6,79	found	found
B5ME19	Eukaryotic translation initiation factor 3 subunit C-like protein OS=Homo sapiens GN=EIF3CL PE=3 SV=1	0,00348432055749129	3	0,87527352297593	1	6	1	1	914	105,407	5	1	5,64	found	found
P31942	Heterogeneous nuclear ribonucleoprotein H3 OS=Homo sapiens GN=HNRNPH3 PE=1 SV=2	0	7	8	3	15	2	1	346	36,903	5	3	6,87	found	found
Q92843-2	Isoform 3 of Bcl-2-like protein 2 OS=Homo sapiens GN=BCL2L2	0	3	5	2	7	2	1	333	37,147	6	2	8,13	found	found
O95747	Serine/threonine-protein kinase OSR1 OS=Homo sapiens GN=OXSR1 PE=1 SV=1	0	3	2	1	6	1	1	527	57,986	6	1	6,43	found	found
P26368	Splicing factor U2AF 65 kDa subunit OS=Homo sapiens GN=U2AF2 PE=1 SV=4	0	11,579437004952	9	3	8	3	1	475	53,467	4	3	9,09	found	found
Q8NBS9	Thioredoxin domain-containing protein 5 OS=Homo sapiens GN=TXNDC5 PE=1 SV=2	0,000656167979002625	3	2	1	6	1	1	432	47,599	2	1	5,97	found	found
Q9NZ01	Very-long-chain enoyl-CoA reductase OS=Homo sapiens GN=TECR PE=1 SV=1	0	6	6	2	7	2	1	308	36,011	6	2	9,45	found	found
Q04917	14-3-3 protein eta OS=Homo sapiens GN=YWHAH PE=1 SV=4	0	9	11	4	11	3	1	246	28,201	11	4	4,84	found	found
P62857	40S ribosomal protein S28 OS=Homo sapiens GN=RPS28 PE=1 SV=1	0	7	30	2	11	2	1	69	7,836	19	2	10,7	found	found
P39687	Acidic leucine-rich nuclear phosphoprotein 32 family member A OS=Homo sapiens GN=ANP32A PE=1 SV=1	0	15	19	5	20	4	1	249	28,568	14	5	4,09	found	found
O95372	Acyl-protein thioesterase 2 OS=Homo sapiens GN=LYPLA2 PE=1 SV=1	0	12	25	4	8	4	1	231	24,721	6	4	7,23	found	found
Q9HDC9	Adipocyte plasma membrane-associated protein OS=Homo sapiens GN=APMAP PE=1 SV=2	0	8,5760823572342	7	3	10	3	1	416	46,451	5	3	6,16	found	found
P11766	Alcohol dehydrogenase class-3 OS=Homo sapiens GN=ADH5 PE=1 SV=4	0	7,8521564838596	10,427807486631	3	7	3	1	374	39,698	3	3	7,49	found	found
P81605-2	Isoform 2 of Dermcidin OS=Homo sapiens GN=DCD	0,000656167979002625	3	9	1	7	1	1	121	12,406	6,2158750295639	1	7,97	found	found
P04899-4	Isoform sGi2 of Guanine nucleotide-binding protein G(i) subunit alpha-2 OS=Homo sapiens GN=GNAI2	0	13	16	5	19	3	1	366	41,522	17	5	5,99	found	found
Q15102	Platelet-activating factor acetylhydrolase IB subunit gamma OS=Homo sapiens GN=PAFAH1B3 PE=1 SV=1	0	4	6	2	7	2	1	231	25,718	3	2	6,84	found	found
P09874	Poly [ADP-ribose] polymerase 1 OS=Homo sapiens GN=PARP1 PE=1 SV=4	0	17	7	6	13	6	1	1014	113,012	18	6	8,88	found	found
Q9UKM9	RNA-binding protein Raly OS=Homo sapiens GN=RALY PE=1 SV=1	0	11	13	4	10	4	1	306	32,444	3	4	9,17	found	found
Q8IYB3	Serine/arginine repetitive matrix protein 1 OS=Homo sapiens GN=SRRM1 PE=1 SV=2	0,000656167979002625	3	1	1	7	1	1	904	102,274	5,4115252494812	1	11,84	found	found
O75533	Splicing factor 3B subunit 1 OS=Homo sapiens GN=SF3B1 PE=1 SV=3	0	14,874336363384	5	7	10	7	1	1304	145,738	0	7	7,09	found	found
P43307	Translocon-associated protein subunit alpha OS=Homo sapiens GN=SSR1 PE=1 SV=3	0	6	9	2	9	2	1	286	32,215	7,4433845281601	2	4,49	found	found
P68371	Tubulin beta-4B chain OS=Homo sapiens GN=TUBB4B PE=1 SV=1	0	96,216932505703	66	23	588	1	1	445	49,799	703	23	4,89	found	found
O60701	UDP-glucose 6-dehydrogenase OS=Homo sapiens GN=UGDH PE=1 SV=1	0	10	8	4	8	4	1	494	54,989	3	4	7,12	found	found
Q9NVJ2	ADP-ribosylation factor-like protein 8B OS=Homo sapiens GN=ARL8B PE=1 SV=1	0	9	22	3	10	3	1	186	21,525	9	3	8,43	found	found
O43776	Asparagine--tRNA ligase, cytoplasmic OS=Homo sapiens GN=NARS PE=1 SV=1	0	11	7	4	15	4	1	548	62,903	9,8702517747879	4	6,25	found	found
Q9Y262	Eukaryotic translation initiation factor 3 subunit L OS=Homo sapiens GN=EIF3L PE=1 SV=1	0	10	5	3	11	3	1	564	66,684	20	3	6,34	found	found
Q13310-3	Isoform 3 of Polyadenylate-binding protein 4 OS=Homo sapiens GN=PABPC4	0	21	14	7	16	3	1	660	72,345	18,161404132843	7	9,35	found	found
Q15046-2	Isoform Mitochondrial of Lysine--tRNA ligase OS=Homo sapiens GN=KARS	0	8	6,08	4	9	4	1	625	71,451	10	4	6,81	found	found
P13647	Keratin, type II cytoskeletal 5 OS=Homo sapiens GN=KRT5 PE=1 SV=3	0	75	36	24	118	13	1	590	62,34	147	24	7,74	found	found
P36969	Phospholipid hydroperoxide glutathione peroxidase, mitochondrial OS=Homo sapiens GN=GPX4 PE=1 SV=3	0,00589970501474926	2	3	1	8	1	1	197	22,161	9	1	8,37	found	found
P61019	Ras-related protein Rab-2A OS=Homo sapiens GN=RAB2A PE=1 SV=1	0	12	23	4	11	4	1	212	23,531	12	4	6,54	found	found
O95470	Sphingosine-1-phosphate lyase 1 OS=Homo sapiens GN=SGPL1 PE=1 SV=3	0	12	10	4	10	4	1	568	63,483	12	4	9,16	found	found
P26373	60S ribosomal protein L13 OS=Homo sapiens GN=RPL13 PE=1 SV=4	0	13	19	4	23	4	1	211	24,247	21	4	11,65	found	found
O75947	ATP synthase subunit d, mitochondrial OS=Homo sapiens GN=ATP5H PE=1 SV=3	0	16	37,888198757764	5	19	5	1	161	18,479	12,368155837059	5	5,3	found	found
P33992	DNA replication licensing factor MCM5 OS=Homo sapiens GN=MCM5 PE=1 SV=5	0	15	8	5	14	5	1	734	82,233	15	5	8,37	found	found
O60506	Heterogeneous nuclear ribonucleoprotein Q OS=Homo sapiens GN=SYNCRIP PE=1 SV=2	0	15	8	5	18	4	1	623	69,56	12	5	8,59	found	found
P22102	Trifunctional purine biosynthetic protein adenosine-3 OS=Homo sapiens GN=GART PE=1 SV=1	0	14	6	5	12	5	1	1010	107,699	8	5	6,7	found	found
P52209	6-phosphogluconate dehydrogenase, decarboxylating OS=Homo sapiens GN=PGD PE=1 SV=3	0	20	18	7	16	7	1	483	53,106	17	7	7,23	found	found
P04083	Annexin A1 OS=Homo sapiens GN=ANXA1 PE=1 SV=2	0	23	29	8	29	8	1	346	38,69	26	8	7,02	found	found
P36957	Dihydrolipoyllysine-residue succinyltransferase component of 2-oxoglutarate dehydrogenase complex, mitochondrial OS=Homo sapiens GN=DLST PE=1 SV=4	0	16	11	5	18	5	1	453	48,724	18	5	8,95	found	found
Q15084-2	Isoform 2 of Protein disulfide-isomerase A6 OS=Homo sapiens GN=PDIA6	0	19	15,650406504065	6	18	6	1	492	53,867	14	6	5,33	found	found
P60033	CD81 antigen OS=Homo sapiens GN=CD81 PE=1 SV=1	0	5	16	2	4	2	1	236	25,792	0	2	5,29	found	found
O75367	Core histone macro-H2A.1 OS=Homo sapiens GN=H2AFY PE=1 SV=4	0	7	9	3	11	1	1	372	39,592	11	3	9,79	found	found
Q9UBQ7	Glyoxylate reductase/hydroxypyruvate reductase OS=Homo sapiens GN=GRHPR PE=1 SV=1	0	6	7	2	5	2	1	328	35,646	0	2	7,39	found	found
Q9NY12	H/ACA ribonucleoprotein complex subunit 1 OS=Homo sapiens GN=GAR1 PE=1 SV=1	0,00651041666666667	2	8	1	4	1	1	217	22,334	0	1	10,92	found	found
Q09028	Histone-binding protein RBBP4 OS=Homo sapiens GN=RBBP4 PE=1 SV=3	0	5	3	1	5	1	1	425	47,626	2	1	4,89	found	found
Q9UHQ4-2	Isoform 2 of B-cell receptor-associated protein 29 OS=Homo sapiens GN=BCAP29	0	5	4	1	4	1	1	348	40,771	3	1	9,72	found	found
Q3ZCQ8-2	Isoform 2 of Mitochondrial import inner membrane translocase subunit TIM50 OS=Homo sapiens GN=TIMM50	0,00358521787093216	2,8018930011266	2	1	4	1	1	456	50,433	4	1	9,42	found	found
Q15008-4	Isoform 4 of 26S proteasome non-ATPase regulatory subunit 6 OS=Homo sapiens GN=PSMD6	0	5	6	2	4	2	1	442	51,889	0	2	6,74	found	found
P52434-4	Isoform 4 of DNA-directed RNA polymerases I, II, and III subunit RPABC3 OS=Homo sapiens GN=POLR2H	0	3	7	1	4	1	1	175	19,755	2	1	4,67	found	found
O15027-5	Isoform 5 of Protein transport protein Sec16A OS=Homo sapiens GN=SEC16A	0,00348432055749129	3	0,545206724216265	1	4	1	1	2201	235,607	0	1	5,67	found	found
P19013	Keratin, type II cytoskeletal 4 OS=Homo sapiens GN=KRT4 PE=1 SV=4	0	13	6	4	27	1	1	534	57,25	50	4	6,61	found	found
P24043	Laminin subunit alpha-2 OS=Homo sapiens GN=LAMA2 PE=1 SV=4	0,000656167979002625	3	0,448430493273543	1	4	1	1	3122	343,684	6	1	6,4	found	found
Q9NZJ7	Mitochondrial carrier homolog 1 OS=Homo sapiens GN=MTCH1 PE=1 SV=1	0	5	4	2	4	2	1	389	41,517	0	2	9,32	found	found
P56556	NADH dehydrogenase [ubiquinone] 1 alpha subcomplex subunit 6 OS=Homo sapiens GN=NDUFA6 PE=1 SV=3	0,000656167979002625	3	7	1	4	1	1	154	17,859	2	1	10,14	found	found
P49720	Proteasome subunit beta type-3 OS=Homo sapiens GN=PSMB3 PE=1 SV=2	0,00358521787093216	2	4,8780487804878	1	4	1	1	205	22,933	0	1	6,55	found	found
P07237	Protein disulfide-isomerase OS=Homo sapiens GN=P4HB PE=1 SV=3	0	6	4,7244094488189	3	5	3	1	508	57,081	3	3	4,87	found	found
Q9BVK6	Transmembrane emp24 domain-containing protein 9 OS=Homo sapiens GN=TMED9 PE=1 SV=2	0	3	3	2	4	2	1	235	27,26	5	2	8,02	found	found
Q9H330	Transmembrane protein 245 OS=Homo sapiens GN=TMEM245 PE=1 SV=2	0,000656167979002625	3	1	1	4	1	1	911	100,881	7	1	8,87	found	found
Q99460	26S proteasome non-ATPase regulatory subunit 1 OS=Homo sapiens GN=PSMD1 PE=1 SV=2	0	8	3	3	6	3	1	953	105,769	7,4425413608551	3	5,39	found	found
O75832	26S proteasome non-ATPase regulatory subunit 10 OS=Homo sapiens GN=PSMD10 PE=1 SV=1	0,000656167979002625	3	4	1	5	1	1	226	24,412	10	1	6,1	found	found
P47914	60S ribosomal protein L29 OS=Homo sapiens GN=RPL29 PE=1 SV=2	0,00358521787093216	2	5,0314465408805	1	5	1	1	159	17,741	7	1	11,66	found	found
Q8TB61	Adenosine 3'-phospho 5'-phosphosulfate transporter 1 OS=Homo sapiens GN=SLC35B2 PE=1 SV=1	0,000656167979002625	3	2	1	5	1	1	432	47,484	11	1	9,16	found	found
P00568	Adenylate kinase isoenzyme 1 OS=Homo sapiens GN=AK1 PE=1 SV=3	0	7	23	3	7	3	1	194	21,621	5	3	8,63	found	found
Q12797	Aspartyl/asparaginyl beta-hydroxylase OS=Homo sapiens GN=ASPH PE=1 SV=3	0	9	4	3	8	3	1	758	85,809	6	3	5,01	found	found
P23786	Carnitine O-palmitoyltransferase 2, mitochondrial OS=Homo sapiens GN=CPT2 PE=1 SV=2	0	6	3	3	7	3	1	658	73,73	5	3	8,18	found	found
Q99829	Copine-1 OS=Homo sapiens GN=CPNE1 PE=1 SV=1	0,000656167979002625	3	1	1	5	1	1	537	59,022	8	1	5,83	found	found
Q9UNE7	E3 ubiquitin-protein ligase CHIP OS=Homo sapiens GN=STUB1 PE=1 SV=2	0	5	4	2	5	2	1	303	34,834	4	2	5,87	found	found
P42126	Enoyl-CoA delta isomerase 1, mitochondrial OS=Homo sapiens GN=ECI1 PE=1 SV=1	0	6	12	2	6	2	1	302	32,795	4	2	8,54	found	found
O75477	Erlin-1 OS=Homo sapiens GN=ERLIN1 PE=1 SV=1	0	14	16	5	13	2	1	346	38,901	9,6584757566452	5	7,87	found	found
Q13347	Eukaryotic translation initiation factor 3 subunit I OS=Homo sapiens GN=EIF3I PE=1 SV=1	0	7	11	3	5	3	1	325	36,479	2	3	5,64	found	found
P14324	Farnesyl pyrophosphate synthase OS=Homo sapiens GN=FDPS PE=1 SV=4	0,000656167979002625	3	2	1	5	1	1	419	48,245	11	1	6,15	found	found
P35914	Hydroxymethylglutaryl-CoA lyase, mitochondrial OS=Homo sapiens GN=HMGCL PE=1 SV=2	0	6	7	2	5	2	1	325	34,338	6,1904239654541	2	8,54	found	found
P51553	Isocitrate dehydrogenase [NAD] subunit gamma, mitochondrial OS=Homo sapiens GN=IDH3G PE=1 SV=1	0	4	4	2	5	2	1	393	42,767	1	2	8,5	found	found
O94875-10	Isoform 10 of Sorbin and SH3 domain-containing protein 2 OS=Homo sapiens GN=SORBS2	0	3	1	1	5	1	1	824	91,221	6	1	9,17	found	found
Q96AB3-2	Isoform 2 of Isochorismatase domain-containing protein 2 OS=Homo sapiens GN=ISOC2	0	5	20	2	5	2	1	221	24,082	2	2	7,77	found	found
Q9Y3F4-2	Isoform 2 of Serine-threonine kinase receptor-associated protein OS=Homo sapiens GN=STRAP	0,00358521787093216	2	2	1	5	1	1	363	39,753	4,8056652545929	1	5,31	found	found
Q08431	Lactadherin OS=Homo sapiens GN=MFGE8 PE=1 SV=2	0	15	18	6	7	6	1	387	43,095	3	6	8,15	found	found
Q9H0U3	Magnesium transporter protein 1 OS=Homo sapiens GN=MAGT1 PE=1 SV=1	0	5	5	2	5	2	1	335	38,011	1	2	9,63	found	found
Q9NU22	Midasin OS=Homo sapiens GN=MDN1 PE=1 SV=2	0	12	0,982844889206576	5	6	5	1	5596	632,42	2	5	5,68	found	found
P28482	Mitogen-activated protein kinase 1 OS=Homo sapiens GN=MAPK1 PE=1 SV=3	0	4	9	2	5	2	1	360	41,363	0	2	6,98	found	found
O95299	NADH dehydrogenase [ubiquinone] 1 alpha subcomplex subunit 10, mitochondrial OS=Homo sapiens GN=NDUFA10 PE=1 SV=1	0	13	11,830985915493	4	10	4	1	355	40,725	14	4	8,48	found	found
Q9NVE7	Pantothenate kinase 4 OS=Homo sapiens GN=PANK4 PE=1 SV=1	0	6	2	2	5	2	1	773	85,937	7,5602400302887	2	6,28	found	found
Q8IZL8	Proline-, glutamic acid- and leucine-rich protein 1 OS=Homo sapiens GN=PELP1 PE=1 SV=2	0	9	4	3	7	3	1	1130	119,624	8	3	4,34	found	found
Q07954	Prolow-density lipoprotein receptor-related protein 1 OS=Homo sapiens GN=LRP1 PE=1 SV=2	0	10	1	4	7	4	1	4544	504,276	6,2375875711441	4	5,39	found	found
P13489	Ribonuclease inhibitor OS=Homo sapiens GN=RNH1 PE=1 SV=2	0	5	4	2	6	2	1	461	49,941	0	2	4,82	found	found
Q92797	Symplekin OS=Homo sapiens GN=SYMPK PE=1 SV=2	0	5	1	2	5	2	1	1274	141,059	8	2	6,13	found	found
P54578	Ubiquitin carboxyl-terminal hydrolase 14 OS=Homo sapiens GN=USP14 PE=1 SV=3	0,000656167979002625	3	2	1	5	1	1	494	56,033	2	1	5,3	found	found
O00159	Unconventional myosin-Ic OS=Homo sapiens GN=MYO1C PE=1 SV=4	0	4	1	2	5	2	1	1063	121,606	4	2	9,41	found	found
P67812-3	Isoform 3 of Signal peptidase complex catalytic subunit SEC11A OS=Homo sapiens GN=SEC11A	0,0393120393120393	1	3	1	5	1	1	185	21,44	0	1	9,42	found	found
P43686	26S protease regulatory subunit 6B OS=Homo sapiens GN=PSMC4 PE=1 SV=2	0	7	7	3	7	3	1	418	47,337	8	3	5,21	found	found
Q9BTT0	Acidic leucine-rich nuclear phosphoprotein 32 family member E OS=Homo sapiens GN=ANP32E PE=1 SV=1	0	7,013682676909	10	2	7	2	1	268	30,674	7	2	3,85	found	found
P61158	Actin-related protein 3 OS=Homo sapiens GN=ACTR3 PE=1 SV=3	0	8	4	2	9	2	1	418	47,341	12	2	5,88	found	found
P02765	Alpha-2-HS-glycoprotein OS=Homo sapiens GN=AHSG PE=1 SV=1	0	10,669792233903	5	3	20	3	1	367	39,3	20	3	5,72	found	found
Q8NE71	ATP-binding cassette sub-family F member 1 OS=Homo sapiens GN=ABCF1 PE=1 SV=2	0	8	2	2	7	2	1	845	95,866	7	2	6,8	found	found
Q9UMR2	ATP-dependent RNA helicase DDX19B OS=Homo sapiens GN=DDX19B PE=1 SV=1	0	9	11	3	6	3	1	479	53,893	4	3	6,3	found	found
P08962	CD63 antigen OS=Homo sapiens GN=CD63 PE=1 SV=2	0,00651041666666667	2	3	1	6	1	1	238	25,619	8	1	7,81	found	found
Q13011	Delta(3,5)-Delta(2,4)-dienoyl-CoA isomerase, mitochondrial OS=Homo sapiens GN=ECH1 PE=1 SV=2	0	6	6	2	6	2	1	328	35,793	1	2	8	found	found
Q9H1X3	DnaJ homolog subfamily C member 25 OS=Homo sapiens GN=DNAJC25 PE=1 SV=1	0	6	3	1	6	1	1	360	42,377	11	1	9,13	found	found
P07099	Epoxide hydrolase 1 OS=Homo sapiens GN=EPHX1 PE=1 SV=1	0	11	13	4	10	4	1	455	52,915	11	4	7,25	found	found
Q01469	Fatty acid-binding protein, epidermal OS=Homo sapiens GN=FABP5 PE=1 SV=3	0	9	17	3	10	3	1	135	15,155	13,619434595108	3	7,01	found	found
O75955	Flotillin-1 OS=Homo sapiens GN=FLOT1 PE=1 SV=3	0	7	8	3	8	3	1	427	47,326	1	3	7,49	found	found
P63010-2	Isoform 2 of AP-2 complex subunit beta OS=Homo sapiens GN=AP2B1	0	7	3	3	9	3	1	951	105,625	4	3	5,34	found	found
Q9Y2A7-2	Isoform 2 of Nck-associated protein 1 OS=Homo sapiens GN=NCKAP1	0,00348432055749129	3	0,793650793650794	1	6	1	1	1134	129,433	9	1	6,68	found	found
P07093-3	Isoform 3 of Glia-derived nexin OS=Homo sapiens GN=SERPINE2	0	7	2	2	8	2	1	409	45,238	12,586662530899	2	9,22	found	found
P32322-3	Isoform 3 of Pyrroline-5-carboxylate reductase 1, mitochondrial OS=Homo sapiens GN=PYCR1	0	12	16	4	14	3	1	346	35,958	19	4	7,61	found	found
P35580-4	Isoform 4 of Myosin-10 OS=Homo sapiens GN=MYH10	0	112	19	34	117	2	1	2007	232,385	113	34	5,55	found	found
O75112-7	Isoform 7 of LIM domain-binding protein 3 OS=Homo sapiens GN=LDB3	0	6	3	2	7	2	1	732	78,455	10	2	8,15	found	found
Q8N1G4	Leucine-rich repeat-containing protein 47 OS=Homo sapiens GN=LRRC47 PE=1 SV=1	0	9	4	3	7	3	1	583	63,434	10	3	8,28	found	found
Q5JPE7	Nodal modulator 2 OS=Homo sapiens GN=NOMO2 PE=1 SV=1	0	6	1	2	8	2	1	1267	139,351	11	2	5,76	found	found
Q9NQC3	Reticulon-4 OS=Homo sapiens GN=RTN4 PE=1 SV=2	0	5	2	2	7	2	1	1192	129,851	2	2	4,5	found	found
O76021	Ribosomal L1 domain-containing protein 1 OS=Homo sapiens GN=RSL1D1 PE=1 SV=3	0	6	8	3	6	3	1	490	54,939	0	3	10,13	found	found
Q9UHD8	Septin-9 OS=Homo sapiens GN=SEPT9 PE=1 SV=2	0	9	6	3	7	3	1	586	65,361	7	3	8,97	found	found
Q9NTI5	Sister chromatid cohesion protein PDS5 homolog B OS=Homo sapiens GN=PDS5B PE=1 SV=1	0,00358521787093216	2	0,621976503109883	1	7	1	1	1447	164,563	10	1	8,47	found	found
Q8N357	Solute carrier family 35 member F6 OS=Homo sapiens GN=SLC35F6 PE=1 SV=1	0	7	3	1	8	1	1	371	40,188	18	1	6,93	found	found
O60264	SWI/SNF-related matrix-associated actin-dependent regulator of chromatin subfamily A member 5 OS=Homo sapiens GN=SMARCA5 PE=1 SV=1	0	9,50949974884	3	4	8	4	1	1052	121,828	3	4	8,09	found	found
Q16851	UTP--glucose-1-phosphate uridylyltransferase OS=Homo sapiens GN=UGP2 PE=1 SV=5	0	16,641272002993	15	6	12	6	1	508	56,905	3	6	8,15	found	found
P62277	40S ribosomal protein S13 OS=Homo sapiens GN=RPS13 PE=1 SV=2	0	8	19,205298013245	3	8	3	1	151	17,212	1	3	10,54	found	found
P00966	Argininosuccinate synthase OS=Homo sapiens GN=ASS1 PE=1 SV=2	0	15	17	6	17	6	1	412	46,501	6	6	8,02	found	found
P13929	Beta-enolase OS=Homo sapiens GN=ENO3 PE=1 SV=5	0	20,304831946051	20	6	17	3	1	434	46,957	22	6	7,71	found	found
Q9UBG0	C-type mannose receptor 2 OS=Homo sapiens GN=MRC2 PE=1 SV=2	0	13	3	4	11	4	1	1479	166,568	18	4	5,83	found	found
P27695	DNA-(apurinic or apyrimidinic site) lyase OS=Homo sapiens GN=APEX1 PE=1 SV=2	0	12	17	4	13	4	1	318	35,532	19	4	8,12	found	found
P20042	Eukaryotic translation initiation factor 2 subunit 2 OS=Homo sapiens GN=EIF2S2 PE=1 SV=2	0	8	8	3	7	3	1	333	38,364	5,209019780159	3	5,8	found	found
P21266	Glutathione S-transferase Mu 3 OS=Homo sapiens GN=GSTM3 PE=1 SV=3	0	17	17	4	12	4	1	225	26,542	15	4	5,54	found	found
Q9UBI6	Guanine nucleotide-binding protein G(I)/G(S)/G(O) subunit gamma-12 OS=Homo sapiens GN=GNG12 PE=1 SV=3	0	9	56	3	8	3	1	72	8,001	3,945152759552	3	8,97	found	found
P05455	Lupus La protein OS=Homo sapiens GN=SSB PE=1 SV=2	0	8	8	3	8	3	1	408	46,808	7,5440833568573	3	7,12	found	found
Q14108	Lysosome membrane protein 2 OS=Homo sapiens GN=SCARB2 PE=1 SV=2	0	12	8	4	8	4	1	478	54,255	6	4	5,14	found	found
P55001	Microfibrillar-associated protein 2 OS=Homo sapiens GN=MFAP2 PE=2 SV=1	0	11	14	3	8	3	1	183	20,812	3	3	4,97	found	found
P04181	Ornithine aminotransferase, mitochondrial OS=Homo sapiens GN=OAT PE=1 SV=1	0,00348432055749129	3	2	1	7	1	1	439	48,504	0	1	7,03	found	found
O75475	PC4 and SFRS1-interacting protein OS=Homo sapiens GN=PSIP1 PE=1 SV=1	0	6	4	3	8	3	1	530	60,067	4	3	9,13	found	found
P23634	Plasma membrane calcium-transporting ATPase 4 OS=Homo sapiens GN=ATP2B4 PE=1 SV=2	0	9	2	3	8	3	1	1241	137,833	15	3	6,6	found	found
P35659	Protein DEK OS=Homo sapiens GN=DEK PE=1 SV=1	0	12	11,2	4	11	4	1	375	42,648	2	4	8,56	found	found
Q8TC12	Retinol dehydrogenase 11 OS=Homo sapiens GN=RDH11 PE=1 SV=2	0	9	10,062893081761	3	9	3	1	318	35,363	14	3	8,82	found	found
Q16181	Septin-7 OS=Homo sapiens GN=SEPT7 PE=1 SV=2	0	14	12	4	11	4	1	437	50,648	8	4	8,63	found	found
P49591	Serine--tRNA ligase, cytoplasmic OS=Homo sapiens GN=SARS PE=1 SV=3	0	12	9	4	7	4	1	514	58,74	7	4	6,43	found	found
Q9Y2W1	Thyroid hormone receptor-associated protein 3 OS=Homo sapiens GN=THRAP3 PE=1 SV=2	0	11	3,7696335078534	3	9	3	1	955	108,601	8	3	10,15	found	found
P50552	Vasodilator-stimulated phosphoprotein OS=Homo sapiens GN=VASP PE=1 SV=3	0	6	5	2	8	2	1	380	39,805	10	2	8,94	found	found
P62913	60S ribosomal protein L11 OS=Homo sapiens GN=RPL11 PE=1 SV=2	0	8,8287098663346	17	3	11	3	1	178	20,24	6	3	9,6	found	found
P84085	ADP-ribosylation factor 5 OS=Homo sapiens GN=ARF5 PE=1 SV=2	0	10	24	3	21	1	1	180	20,517	31	3	6,79	found	found
P50995	Annexin A11 OS=Homo sapiens GN=ANXA11 PE=1 SV=1	0	14	11	5	12	5	1	505	54,355	7	5	7,65	found	found
P49736	DNA replication licensing factor MCM2 OS=Homo sapiens GN=MCM2 PE=1 SV=4	0	11	5	5	9	5	1	904	101,832	3	5	5,52	found	found
P31689	DnaJ homolog subfamily A member 1 OS=Homo sapiens GN=DNAJA1 PE=1 SV=2	0	11	10	4	10	4	1	397	44,839	8	4	7,08	found	found
Q9UNM6-2	Isoform 2 of 26S proteasome non-ATPase regulatory subunit 13 OS=Homo sapiens GN=PSMD13	0	11,297498270816	10	4	8	4	1	378	42,915	1	4	6,54	found	found
Q9UJS0-2	Isoform 2 of Calcium-binding mitochondrial carrier protein Aralar2 OS=Homo sapiens GN=SLC25A13	0	21,888712679234	17	9	17	5	1	676	74,257	10	9	8,62	found	found
P60660	Myosin light polypeptide 6 OS=Homo sapiens GN=MYL6 PE=1 SV=2	0	7	21	3	10	3	1	151	16,919	5	3	4,65	found	found
Q9NR30	Nucleolar RNA helicase 2 OS=Homo sapiens GN=DDX21 PE=1 SV=5	0	11	6	5	13	5	1	783	87,29	1	5	9,28	found	found
P62820	Ras-related protein Rab-1A OS=Homo sapiens GN=RAB1A PE=1 SV=3	0	20	32	7	63	3	1	205	22,663	32	7	6,21	found	found
P20340	Ras-related protein Rab-6A OS=Homo sapiens GN=RAB6A PE=1 SV=3	0	13	27	5	31	4	1	208	23,578	11	5	5,54	found	found
Q99442	Translocation protein SEC62 OS=Homo sapiens GN=SEC62 PE=1 SV=1	0	10	3	2	14	2	1	399	45,833	22	2	7,12	found	found
Q92544	Transmembrane 9 superfamily member 4 OS=Homo sapiens GN=TM9SF4 PE=1 SV=2	0	11	7	4	10	4	1	642	74,47	4	4	6,54	found	found
Q15363	Transmembrane emp24 domain-containing protein 2 OS=Homo sapiens GN=TMED2 PE=1 SV=1	0	9	24	3	10	3	1	201	22,746	6	3	5,17	found	found
P62854	40S ribosomal protein S26 OS=Homo sapiens GN=RPS26 PE=1 SV=3	0	8	32	3	11	3	1	115	13,007	8,0466068983078	3	11	found	found
Q969Q0	60S ribosomal protein L36a-like OS=Homo sapiens GN=RPL36AL PE=1 SV=3	0	10,299933670612	25	4	14	4	1	106	12,461	14	4	10,65	found	found
Q9UBM7	7-dehydrocholesterol reductase OS=Homo sapiens GN=DHCR7 PE=1 SV=1	0	8	8	4	11	4	1	475	54,454	3,9609682559967	4	8,7	found	found
P08243	Asparagine synthetase [glutamine-hydrolyzing] OS=Homo sapiens GN=ASNS PE=1 SV=4	0	13	9	3	14	3	1	561	64,329	24	3	6,86	found	found
P02794	Ferritin heavy chain OS=Homo sapiens GN=FTH1 PE=1 SV=2	0	11	15	3	11	3	1	183	21,212	9	3	5,55	found	found
P43304	Glycerol-3-phosphate dehydrogenase, mitochondrial OS=Homo sapiens GN=GPD2 PE=1 SV=3	0	14	10,041265474553	5	12	5	1	727	80,802	5	5	7,69	found	found
P16104	Histone H2AX OS=Homo sapiens GN=H2AFX PE=1 SV=2	0	15	47	4	49	2	1	143	15,135	76	4	10,74	found	found
P62847-4	Isoform 4 of 40S ribosomal protein S24 OS=Homo sapiens GN=RPS24	0	6	9	2	9	2	1	289	32,41	20	2	10,15	found	found
O75369-8	Isoform 8 of Filamin-B OS=Homo sapiens GN=FLNB	0	23	2	7	28	4	1	2633	281,459	33	7	5,71	found	found
Q10713	Mitochondrial-processing peptidase subunit alpha OS=Homo sapiens GN=PMPCA PE=1 SV=2	0	12	12	4	13	4	1	525	58,216	17	4	6,92	found	found
P26038	Moesin OS=Homo sapiens GN=MSN PE=1 SV=3	0	27	11	10	29	6	1	577	67,778	48,567209482193	10	6,4	found	found
Q01105	Protein SET OS=Homo sapiens GN=SET PE=1 SV=3	0	14,452675423357	27	5	14	5	1	290	33,469	4	5	4,32	found	found
Q01130	Serine/arginine-rich splicing factor 2 OS=Homo sapiens GN=SRSF2 PE=1 SV=4	0	11	18	4	15	4	1	221	25,461	21	4	11,85	found	found
P62312	U6 snRNA-associated Sm-like protein LSm6 OS=Homo sapiens GN=LSM6 PE=1 SV=1	0,00358521787093216	2	10	1	9	1	1	80	9,122	13	1	9,58	found	found
P61204	ADP-ribosylation factor 3 OS=Homo sapiens GN=ARF3 PE=1 SV=2	0	15	39	5	26	3	1	181	20,588	19	5	7,43	found	found
P20073	Annexin A7 OS=Homo sapiens GN=ANXA7 PE=1 SV=3	0	13	12	5	13	5	1	488	52,706	11	5	5,68	found	found
O00299	Chloride intracellular channel protein 1 OS=Homo sapiens GN=CLIC1 PE=1 SV=4	0	17	35	6	13	6	1	241	26,906	9	6	5,17	found	found
P22695	Cytochrome b-c1 complex subunit 2, mitochondrial OS=Homo sapiens GN=UQCRC2 PE=1 SV=3	0	14,559795236442	12	5	20	5	1	453	48,413	15	5	8,63	found	found
Q9BQG0-2	Isoform 2 of Myb-binding protein 1A OS=Homo sapiens GN=MYBBP1A	0	11	3	4	13	4	1	1332	149,274	18	4	9,28	found	found
P29401-2	Isoform 2 of Transketolase OS=Homo sapiens GN=TKT	0	52	41	18	41	18	1	631	68,77	54	18	7,52	found	found
P63000-2	Isoform B of Ras-related C3 botulinum toxin substrate 1 OS=Homo sapiens GN=RAC1	0	11	18	4	20	3	1	211	23,452	3	4	8,63	found	found
Q9Y624	Junctional adhesion molecule A OS=Homo sapiens GN=F11R PE=1 SV=1	0	14	23	6	16	6	1	299	32,562	8	6	7,9	found	found
P56192	Methionine--tRNA ligase, cytoplasmic OS=Homo sapiens GN=MARS PE=1 SV=2	0	22	13	8	16	8	1	900	101,052	11	8	6,16	found	found
Q9H9Z2	Protein lin-28 homolog A OS=Homo sapiens GN=LIN28A PE=1 SV=1	0	13,235511171564	29	4	15	4	1	209	22,728	6	4	8,07	found	found
Q13595	Transformer-2 protein homolog alpha OS=Homo sapiens GN=TRA2A PE=1 SV=1	0	9,6653698916145	8	2	12	2	1	282	32,669	10	2	11,27	found	found
P61586	Transforming protein RhoA OS=Homo sapiens GN=RHOA PE=1 SV=1	0	19	24	5	30	3	1	193	21,754	24	5	6,1	found	found
P0DMV9	Heat shock 70 kDa protein 1B OS=Homo sapiens GN=HSPA1B PE=1 SV=1	0	25	12	9	38	5	1	641	70,009	41	9	5,66	found	found
Q9Y277-2	Isoform 2 of Voltage-dependent anion-selective channel protein 3 OS=Homo sapiens GN=VDAC3	0	11	19	4	13	3	1	284	30,77	3	4	8,66	found	found
P08195-4	Isoform 4 of 4F2 cell-surface antigen heavy chain OS=Homo sapiens GN=SLC3A2	0	27	17	9	42	9	1	661	71,079	25,50062251091	9	4,97	found	found
P06493	Cyclin-dependent kinase 1 OS=Homo sapiens GN=CDK1 PE=1 SV=3	0	7	9	3	17	3	1	297	34,074	19	3	8,4	found	found
Q15907	Ras-related protein Rab-11B OS=Homo sapiens GN=RAB11B PE=1 SV=4	0	18	32	7	24	7	1	218	24,473	6	7	5,94	found	found
P22087	rRNA 2'-O-methyltransferase fibrillarin OS=Homo sapiens GN=FBL PE=1 SV=2	0	11	22	4	12	4	1	321	33,763	5	4	10,18	found	found
Q7KZF4	Staphylococcal nuclease domain-containing protein 1 OS=Homo sapiens GN=SND1 PE=1 SV=1	0	26	11	9	18	9	1	910	101,934	10	9	7,17	found	found
P49189	4-trimethylaminobutyraldehyde dehydrogenase OS=Homo sapiens GN=ALDH9A1 PE=1 SV=3	0,00358521787093216	3	1	1	5	1	1	494	53,767	0	1	5,87	found	found
Q5K4L6	Long-chain fatty acid transport protein 3 OS=Homo sapiens GN=SLC27A3 PE=2 SV=3	0,00358521787093216	2	1,0958904109589	1	5	1	1	730	78,594	7	1	7,49	found	found
Q8NFW8	N-acylneuraminate cytidylyltransferase OS=Homo sapiens GN=CMAS PE=1 SV=2	0,00358521787093216	3	1	1	5	1	1	434	48,349	6	1	7,93	found	found
Q8N1F7	Nuclear pore complex protein Nup93 OS=Homo sapiens GN=NUP93 PE=1 SV=2	0	8,2523460200356	3	3	5	3	1	819	93,43	1	3	5,72	found	found
Q00325	Phosphate carrier protein, mitochondrial OS=Homo sapiens GN=SLC25A3 PE=1 SV=2	0	47	56	16	116	1	1	362	40,069	127	16	9,38	found	found
Q96HY7	Probable 2-oxoglutarate dehydrogenase E1 component DHKTD1, mitochondrial OS=Homo sapiens GN=DHTKD1 PE=1 SV=2	0	5	2	2	5	2	1	919	103,011	5	2	6,93	found	found
Q9UFN0	Protein NipSnap homolog 3A OS=Homo sapiens GN=NIPSNAP3A PE=1 SV=2	0	8	10	3	6	3	1	247	28,449	5	3	9,16	found	found
O43765	Small glutamine-rich tetratricopeptide repeat-containing protein alpha OS=Homo sapiens GN=SGTA PE=1 SV=1	0,00348432055749129	3	4	1	6	1	1	313	34,042	3	1	4,87	found	found
Q9Y3A6	Transmembrane emp24 domain-containing protein 5 OS=Homo sapiens GN=TMED5 PE=1 SV=1	0	4	7,4235807860262	2	5	2	1	229	25,988	0	2	4,84	found	found
O75396	Vesicle-trafficking protein SEC22b OS=Homo sapiens GN=SEC22B PE=1 SV=4	0	8	14	3	5	3	1	215	24,578	6	3	6,92	found	found
Q7Z739	YTH domain-containing family protein 3 OS=Homo sapiens GN=YTHDF3 PE=1 SV=1	0,00348432055749129	3	1	1	5	1	1	585	63,822	4	1	9,04	found	found
P17540	Creatine kinase S-type, mitochondrial OS=Homo sapiens GN=CKMT2 PE=1 SV=2	0	18	16,945107398568	5	9	5	1	419	47,474	5	5	8,19	found	found
Q14008-3	Isoform 3 of Cytoskeleton-associated protein 5 OS=Homo sapiens GN=CKAP5	0	6	1	2	6	2	1	2039	226,114	6	2	7,77	found	found
Q16891	MICOS complex subunit MIC60 OS=Homo sapiens GN=IMMT PE=1 SV=1	0	14	7,9155672823219	6	10	6	1	758	83,626	8	6	6,48	found	found
Q9Y3D6	Mitochondrial fission 1 protein OS=Homo sapiens GN=FIS1 PE=1 SV=2	0,00130890052356021	3	10	1	6	1	1	152	16,927	0	1	8,79	found	found
Q969V3	Nicalin OS=Homo sapiens GN=NCLN PE=1 SV=2	0	6	5	3	8	3	1	563	62,935	8	3	6,89	found	found
Q5SRE5	Nucleoporin NUP188 homolog OS=Homo sapiens GN=NUP188 PE=1 SV=1	0	3	0,914808461978273	1	7	1	1	1749	195,917	18	1	6,73	found	found
Q96EY7	Pentatricopeptide repeat domain-containing protein 3, mitochondrial OS=Homo sapiens GN=PTCD3 PE=1 SV=3	0,00358521787093216	2	1	1	6	1	1	689	78,5	10	1	6,42	found	found
Q9H2M9	Rab3 GTPase-activating protein non-catalytic subunit OS=Homo sapiens GN=RAB3GAP2 PE=1 SV=1	0	5	2	2	8	2	1	1393	155,886	8	2	5,62	found	found
Q9H0A0	RNA cytidine acetyltransferase OS=Homo sapiens GN=NAT10 PE=1 SV=2	0	13	6	4	9	4	1	1025	115,657	8	4	8,27	found	found
Q96I99	Succinate--CoA ligase [GDP-forming] subunit beta, mitochondrial OS=Homo sapiens GN=SUCLG2 PE=1 SV=2	0	6	4	2	6	2	1	432	46,481	9	2	6,39	found	found
P27449	V-type proton ATPase 16 kDa proteolipid subunit OS=Homo sapiens GN=ATP6V0C PE=1 SV=1	0	3	20	1	6	1	1	155	15,725	6	1	8,44	found	found
P56381	ATP synthase subunit epsilon, mitochondrial OS=Homo sapiens GN=ATP5E PE=1 SV=2	0	7	45	3	9	3	1	51	5,776	11	3	9,92	found	found
P11387	DNA topoisomerase 1 OS=Homo sapiens GN=TOP1 PE=1 SV=2	0	12	3	3	11	3	1	765	90,669	5	3	9,31	found	found
Q05639	Elongation factor 1-alpha 2 OS=Homo sapiens GN=EEF1A2 PE=1 SV=1	0	46	39	12	176	3	1	463	50,438	276,0552059412	12	9,03	found	found
Q9BS26	Endoplasmic reticulum resident protein 44 OS=Homo sapiens GN=ERP44 PE=1 SV=1	0	7	2	1	12	1	1	406	46,941	12	1	5,26	found	found
P30043	Flavin reductase (NADPH) OS=Homo sapiens GN=BLVRB PE=1 SV=3	0	8	12	2	9	2	1	206	22,105	14	2	7,65	found	found
P07954	Fumarate hydratase, mitochondrial OS=Homo sapiens GN=FH PE=1 SV=3	0	16	17	5	14	5	1	510	54,602	19	5	8,76	found	found
P78347	General transcription factor II-I OS=Homo sapiens GN=GTF2I PE=1 SV=2	0,000656167979002625	3,708409174342	2	1	7	1	1	998	112,346	8	1	6,39	found	found
P00367	Glutamate dehydrogenase 1, mitochondrial OS=Homo sapiens GN=GLUD1 PE=1 SV=2	0	7	9	3	9	3	1	558	61,359	4	3	7,8	found	found
P78417	Glutathione S-transferase omega-1 OS=Homo sapiens GN=GSTO1 PE=1 SV=2	0	6	4,149377593361	1	11	1	1	241	27,548	12	1	6,6	found	found
P35573	Glycogen debranching enzyme OS=Homo sapiens GN=AGL PE=1 SV=3	0	9	1	2	8	2	1	1532	174,652	18	2	6,76	found	found
Q9UIJ7	GTP:AMP phosphotransferase AK3, mitochondrial OS=Homo sapiens GN=AK3 PE=1 SV=4	0	11	20	4	9	4	1	227	25,55	8	4	9,16	found	found
Q1KMD3	Heterogeneous nuclear ribonucleoprotein U-like protein 2 OS=Homo sapiens GN=HNRNPUL2 PE=1 SV=1	0	7	4	3	8	3	1	747	85,052	11	3	4,91	found	found
P51572-2	Isoform 2 of B-cell receptor-associated protein 31 OS=Homo sapiens GN=BCAP31	0	9	9	3	8	3	1	313	34,73	16	3	7,84	found	found
P35221-2	Isoform 2 of Catenin alpha-1 OS=Homo sapiens GN=CTNNA1	0	16	7	5	11	5	1	930	102,571	10	5	6,34	found	found
Q9Y4K0	Lysyl oxidase homolog 2 OS=Homo sapiens GN=LOXL2 PE=1 SV=1	0	7	3	2	7	2	1	774	86,668	14	2	6,38	found	found
O14880	Microsomal glutathione S-transferase 3 OS=Homo sapiens GN=MGST3 PE=1 SV=1	0	11	34	2	10	2	1	152	16,506	39	2	9,38	found	found
P23368	NAD-dependent malic enzyme, mitochondrial OS=Homo sapiens GN=ME2 PE=1 SV=1	0	8	4	3	9	3	1	584	65,402	7	3	7,61	found	found
P61081	NEDD8-conjugating enzyme Ubc12 OS=Homo sapiens GN=UBE2M PE=1 SV=1	0	10	16	4	8	4	1	183	20,887	14	4	7,69	found	found
O75694	Nuclear pore complex protein Nup155 OS=Homo sapiens GN=NUP155 PE=1 SV=1	0	9	2	4	10	4	1	1391	155,1	5	4	6,16	found	found
O00567	Nucleolar protein 56 OS=Homo sapiens GN=NOP56 PE=1 SV=4	0	13	10	5	9	5	1	594	66,009	2	5	9,19	found	found
P36871	Phosphoglucomutase-1 OS=Homo sapiens GN=PGM1 PE=1 SV=3	0	12,925412193832	8	5	15	5	1	562	61,411	12	5	6,76	found	found
Q15149	Plectin OS=Homo sapiens GN=PLEC PE=1 SV=3	0	10	0,85397096498719	4	9	4	1	4684	531,466	11	4	5,96	found	found
A6NKH3	Putative 60S ribosomal protein L37a-like protein OS=Homo sapiens GN=RPL37AP8 PE=5 SV=2	0,000656167979002625	3	8	1	7	1	1	93	10,576	1	1	10,2	found	found
Q15286	Ras-related protein Rab-35 OS=Homo sapiens GN=RAB35 PE=1 SV=1	0	16	21	5	52	3	1	201	23,011	35	5	8,29	found	found
Q9BRX8	Redox-regulatory protein FAM213A OS=Homo sapiens GN=FAM213A PE=1 SV=3	0	8	15	3	10	3	1	229	25,747	4	3	8,84	found	found
O95197	Reticulon-3 OS=Homo sapiens GN=RTN3 PE=1 SV=2	0	4	1	2	9	2	1	1032	112,541	6	2	4,96	found	found
O15269	Serine palmitoyltransferase 1 OS=Homo sapiens GN=SPTLC1 PE=1 SV=1	0	8,5035941445207	8	3	8	3	1	473	52,71	8	3	6,01	found	found
P02768	Serum albumin OS=Homo sapiens GN=ALB PE=1 SV=2	0	28	11	8	83	3	1	609	69,321	130	8	6,28	found	found
P62995	Transformer-2 protein homolog beta OS=Homo sapiens GN=TRA2B PE=1 SV=1	0	5	8	2	7	2	1	288	33,646	9,2231719493866	2	11,25	found	found
Q92973	Transportin-1 OS=Homo sapiens GN=TNPO1 PE=1 SV=2	0	20,093610876859	14	7	12	7	1	898	102,289	15	7	4,98	found	found
P27348	14-3-3 protein theta OS=Homo sapiens GN=YWHAQ PE=1 SV=1	0	23	28	6	31	3	1	245	27,747	23	6	4,78	found	found
P15121	Aldose reductase OS=Homo sapiens GN=AKR1B1 PE=1 SV=3	0	8	13	3	10	3	1	316	35,83	9	3	6,98	found	found
P54136	Arginine--tRNA ligase, cytoplasmic OS=Homo sapiens GN=RARS PE=1 SV=2	0	15	9	6	14	6	1	660	75,331	6	6	6,68	found	found
P53618	Coatomer subunit beta OS=Homo sapiens GN=COPB1 PE=1 SV=3	0	24	6	6	19	6	1	953	107,074	15	6	6,05	found	found
P50402	Emerin OS=Homo sapiens GN=EMD PE=1 SV=1	0	6	8	2	9	2	1	254	28,976	7	2	5,5	found	found
Q92945	Far upstream element-binding protein 2 OS=Homo sapiens GN=KHSRP PE=1 SV=4	0	14	7	5	16	5	1	711	73,07	11	5	7,3	found	found
Q5VU43-4	Isoform 4 of Myomegalin OS=Homo sapiens GN=PDE4DIP	0,00715197956577267	2	0,381033022861981	1	8	1	1	2362	267,014	10	1	5,48	found	found
Q7L0Y3	Mitochondrial ribonuclease P protein 1 OS=Homo sapiens GN=TRMT10C PE=1 SV=2	0	10	4	2	11	2	1	403	47,317	21	2	9,36	found	found
Q9Y639	Neuroplastin OS=Homo sapiens GN=NPTN PE=1 SV=2	0	8	6	2	9	2	1	398	44,36	3	2	7,99	found	found
Q9Y263	Phospholipase A-2-activating protein OS=Homo sapiens GN=PLAA PE=1 SV=2	0	16	5	5	18	5	1	795	87,101	26	5	6,37	found	found
P38159	RNA-binding motif protein, X chromosome OS=Homo sapiens GN=RBMX PE=1 SV=3	0	17	17	6	22	6	1	391	42,306	17	6	10,05	found	found
Q9Y265	RuvB-like 1 OS=Homo sapiens GN=RUVBL1 PE=1 SV=1	0	11	11	4	11	4	1	456	50,196	6	4	6,42	found	found
P37108	Signal recognition particle 14 kDa protein OS=Homo sapiens GN=SRP14 PE=1 SV=2	0	5	16	2	9	2	1	136	14,561	6	2	10,04	found	found
Q00059	Transcription factor A, mitochondrial OS=Homo sapiens GN=TFAM PE=1 SV=1	0	6	11	3	9	3	1	246	29,078	5	3	9,72	found	found
P35998	26S protease regulatory subunit 7 OS=Homo sapiens GN=PSMC2 PE=1 SV=3	0	13	11	5	12	5	1	433	48,603	12	5	5,95	found	found
O60716	Catenin delta-1 OS=Homo sapiens GN=CTNND1 PE=1 SV=1	0	12	4	4	16	4	1	968	108,103	13,358656167984	4	6,23	found	found
P48444	Coatomer subunit delta OS=Homo sapiens GN=ARCN1 PE=1 SV=1	0	11	8	4	11	4	1	511	57,174	7	4	6,21	found	found
P43246	DNA mismatch repair protein Msh2 OS=Homo sapiens GN=MSH2 PE=1 SV=1	0	19	9	7	12	7	1	934	104,677	6	7	5,77	found	found
Q8TCJ2	Dolichyl-diphosphooligosaccharide--protein glycosyltransferase subunit STT3B OS=Homo sapiens GN=STT3B PE=1 SV=1	0	20,134926026369	5	4	12	4	1	826	93,614	12	4	8,91	found	found
Q92598	Heat shock protein 105 kDa OS=Homo sapiens GN=HSPH1 PE=1 SV=1	0	19	11	7	14	7	1	858	96,804	5	7	5,39	found	found
P06899	Histone H2B type 1-J OS=Homo sapiens GN=HIST1H2BJ PE=1 SV=3	0	22	40	5	69	1	1	126	13,896	100	5	10,32	found	found
Q96SQ9-2	Isoform 2 of Cytochrome P450 2S1 OS=Homo sapiens GN=CYP2S1	0	10	7	3	12	3	1	564	62,191	8	3	9,38	found	found
P61077-3	Isoform 3 of Ubiquitin-conjugating enzyme E2 D3 OS=Homo sapiens GN=UBE2D3	0	7	28	3	10	3	1	149	16,882	1	3	7,74	found	found
Q02978	Mitochondrial 2-oxoglutarate/malate carrier protein OS=Homo sapiens GN=SLC25A11 PE=1 SV=3	0	7	9	3	12	3	1	314	34,04	5	3	9,91	found	found
O95671	N-acetylserotonin O-methyltransferase-like protein OS=Homo sapiens GN=ASMTL PE=1 SV=3	0	12	7	4	13	4	1	621	68,813	15	4	6,07	found	found
Q93008	Probable ubiquitin carboxyl-terminal hydrolase FAF-X OS=Homo sapiens GN=USP9X PE=1 SV=3	0	10	1	3	13	3	1	2570	292,094	16	3	5,8	found	found
P54709	Sodium/potassium-transporting ATPase subunit beta-3 OS=Homo sapiens GN=ATP1B3 PE=1 SV=1	0	13	24	5	13	5	1	279	31,492	5	5	8,35	found	found
P18206	Vinculin OS=Homo sapiens GN=VCL PE=1 SV=4	0	44	14	16	35	16	1	1134	123,722	33	16	5,66	found	found
Q9C037	E3 ubiquitin-protein ligase TRIM4 OS=Homo sapiens GN=TRIM4 PE=1 SV=2	0,0240991507918292	1	2,2	1	9	1	1	500	57,424	5	1	8,1	found	found
P27144	Adenylate kinase 4, mitochondrial OS=Homo sapiens GN=AK4 PE=1 SV=1	0	12	22	5	15	5	1	223	25,252	14	5	8,4	found	found
Q92499	ATP-dependent RNA helicase DDX1 OS=Homo sapiens GN=DDX1 PE=1 SV=2	0	7	5	3	10	3	1	740	82,38	0	3	7,23	found	found
P00403	Cytochrome c oxidase subunit 2 OS=Homo sapiens GN=MT-CO2 PE=1 SV=1	0	7	24	3	10	3	1	227	25,548	7	3	4,82	found	found
Q13151	Heterogeneous nuclear ribonucleoprotein A0 OS=Homo sapiens GN=HNRNPA0 PE=1 SV=1	0	11	17	4	16	3	1	305	30,822	20	4	9,29	found	found
P16402	Histone H1.3 OS=Homo sapiens GN=HIST1H1D PE=1 SV=2	0	23	19	6	33	5	1	221	22,336	59	6	11,02	found	found
P62899-2	Isoform 2 of 60S ribosomal protein L31 OS=Homo sapiens GN=RPL31	0	7	17,96875	2	13	2	1	128	14,623	22	2	10,8	found	found
P43897-2	Isoform 2 of Elongation factor Ts, mitochondrial OS=Homo sapiens GN=TSFM	0	6	8	3	15	3	1	346	37,632	22	3	7,72	found	found
P55884-2	Isoform 2 of Eukaryotic translation initiation factor 3 subunit B OS=Homo sapiens GN=EIF3B	0	15,955301855299	8	5	24	5	1	873	98,967	17	5	5,08	found	found
Q02809-2	Isoform 2 of Procollagen-lysine,2-oxoglutarate 5-dioxygenase 1 OS=Homo sapiens GN=PLOD1	0	24	12	9	22	9	1	774	88,217	13	9	7,11	found	found
P00338-3	Isoform 3 of L-lactate dehydrogenase A chain OS=Homo sapiens GN=LDHA	0	20	29	7	22	6	1	361	39,812	28	7	8,43	found	found
P26599-3	Isoform 3 of Polypyrimidine tract-binding protein 1 OS=Homo sapiens GN=PTBP1	0	19	15	6	22	6	1	557	59,596	27,924836397171	6	9,16	found	found
P41252	Isoleucine--tRNA ligase, cytoplasmic OS=Homo sapiens GN=IARS PE=1 SV=2	0	17	4	6	16	6	1	1262	144,406	17	6	6,15	found	found
P53582	Methionine aminopeptidase 1 OS=Homo sapiens GN=METAP1 PE=1 SV=2	0	10	16	3	10	3	1	386	43,187	4	3	7,17	found	found
O95298	NADH dehydrogenase [ubiquinone] 1 subunit C2 OS=Homo sapiens GN=NDUFC2 PE=1 SV=1	0,00651041666666667	2	5	1	10	1	1	119	14,178	0	1	8,98	found	found
Q9Y2X3	Nucleolar protein 58 OS=Homo sapiens GN=NOP58 PE=1 SV=1	0	16	13	5	13	5	1	529	59,541	21	5	8,92	found	found
P28074	Proteasome subunit beta type-5 OS=Homo sapiens GN=PSMB5 PE=1 SV=3	0	10	12	3	15	3	1	263	28,462	28	3	6,92	found	found
P14618	Pyruvate kinase PKM OS=Homo sapiens GN=PKM PE=1 SV=4	0	81	57	23	206	3	1	531	57,9	210	23	7,84	found	found
P51571	Translocon-associated protein subunit delta OS=Homo sapiens GN=SSR4 PE=1 SV=1	0	8	23,121387283237	3	13	3	1	173	18,987	9	3	6,15	found	found
Q5BJD5	Transmembrane protein 41B OS=Homo sapiens GN=TMEM41B PE=1 SV=1	0	6	8	2	12	2	1	291	32,492	13	2	9,58	found	found
Q08J23	tRNA (cytosine(34)-C(5))-methyltransferase OS=Homo sapiens GN=NSUN2 PE=1 SV=2	0	6,6738296122061	2	2	12	2	1	767	86,416	16	2	6,77	found	found
Q12907	Vesicular integral-membrane protein VIP36 OS=Homo sapiens GN=LMAN2 PE=1 SV=1	0	19	22,752808988764	7	19	7	1	356	40,203	9,0818498134613	7	6,95	found	found
Q02543	60S ribosomal protein L18a OS=Homo sapiens GN=RPL18A PE=1 SV=2	0	10	21	4	20	4	1	176	20,749	22	4	10,71	found	found
P12236	ADP/ATP translocase 3 OS=Homo sapiens GN=SLC25A6 PE=1 SV=4	0	54	66	17	132	3	1	298	32,845	182	17	9,74	found	found
P09429	High mobility group protein B1 OS=Homo sapiens GN=HMGB1 PE=1 SV=3	0	17	34	6	21	6	1	215	24,878	6	6	5,74	found	found
Q96AG4	Leucine-rich repeat-containing protein 59 OS=Homo sapiens GN=LRRC59 PE=1 SV=1	0	8	13	3	12	3	1	307	34,909	9	3	9,57	found	found
Q15185	Prostaglandin E synthase 3 OS=Homo sapiens GN=PTGES3 PE=1 SV=1	0	13	29,375	4	20	4	1	160	18,685	10,281278014183	4	4,54	found	found
P61604	10 kDa heat shock protein, mitochondrial OS=Homo sapiens GN=HSPE1 PE=1 SV=2	0	16	50	5	25	5	1	102	10,925	18	5	8,92	found	found
P62258	14-3-3 protein epsilon OS=Homo sapiens GN=YWHAE PE=1 SV=1	0	21,28504333745	32	6	21	5	1	255	29,155	27	6	4,74	found	found
Q16555	Dihydropyrimidinase-related protein 2 OS=Homo sapiens GN=DPYSL2 PE=1 SV=1	0	20	14	6	24	5	1	572	62,255	18	6	6,38	found	found
Q14103	Heterogeneous nuclear ribonucleoprotein D0 OS=Homo sapiens GN=HNRNPD PE=1 SV=1	0	31	27	8	31	7	1	355	38,41	61	8	7,81	found	found
P25205-2	Isoform 2 of DNA replication licensing factor MCM3 OS=Homo sapiens GN=MCM3	0	16	7	6	16	6	1	853	95,848	4	6	5,77	found	found
P49321-3	Isoform 3 of Nuclear autoantigenic sperm protein OS=Homo sapiens GN=NASP	0	11	5	4	14	4	1	790	86,216	11	4	4,35	found	found
P11940	Polyadenylate-binding protein 1 OS=Homo sapiens GN=PABPC1 PE=1 SV=2	0	27	19,496855345912	9	23	5	1	636	70,626	14,997551202774	9	9,5	found	found
P61224	Ras-related protein Rap-1b OS=Homo sapiens GN=RAP1B PE=1 SV=1	0	14,473425582906	29	5	18	5	1	184	20,812	19	5	5,78	found	found
Q16629	Serine/arginine-rich splicing factor 7 OS=Homo sapiens GN=SRSF7 PE=1 SV=1	0	19,646405177628	27	7	28	6	1	238	27,35	9	7	11,82	found	found
O15260	Surfeit locus protein 4 OS=Homo sapiens GN=SURF4 PE=1 SV=3	0	11	14	4	13	4	1	269	30,374	4	4	7,78	found	found
P08865	40S ribosomal protein SA OS=Homo sapiens GN=RPSA PE=1 SV=4	0	28	54	9	35	9	1	295	32,833	34	9	4,87	found	found
P17844	Probable ATP-dependent RNA helicase DDX5 OS=Homo sapiens GN=DDX5 PE=1 SV=1	0	49,971788965773	25	17	105	9	1	614	69,105	115	17	8,92	found	found
P49755	Transmembrane emp24 domain-containing protein 10 OS=Homo sapiens GN=TMED10 PE=1 SV=2	0	21	23	5	27	5	1	219	24,96	22	5	7,44	found	found
O15235	28S ribosomal protein S12, mitochondrial OS=Homo sapiens GN=MRPS12 PE=1 SV=1	0	6	14	2	8	2	1	138	15,163	14	2	10,29	found	found
Q6NVY1	3-hydroxyisobutyryl-CoA hydrolase, mitochondrial OS=Homo sapiens GN=HIBCH PE=1 SV=2	0	10	8	3	9	3	1	386	43,454	1	3	8,19	found	found
Q7Z4W1	L-xylulose reductase OS=Homo sapiens GN=DCXR PE=1 SV=2	0	10	16	2	9	2	1	244	25,897	8,9048376083374	2	8,1	found	found
O15427	Monocarboxylate transporter 4 OS=Homo sapiens GN=SLC16A3 PE=1 SV=1	0	3	2	1	6	1	1	465	49,437	16	1	7,96	found	found
Q14896	Myosin-binding protein C, cardiac-type OS=Homo sapiens GN=MYBPC3 PE=1 SV=4	0	24,179807111745	7	9	23	9	1	1274	140,674	32	9	6,65	found	found
Q99959	Plakophilin-2 OS=Homo sapiens GN=PKP2 PE=1 SV=2	0	14	6	5	10	5	1	881	97,355	16,081324338913	5	9,33	found	found
Q92743	Serine protease HTRA1 OS=Homo sapiens GN=HTRA1 PE=1 SV=1	0	6	4	2	7	2	1	480	51,255	4	2	7,83	found	found
P19237	Troponin I, slow skeletal muscle OS=Homo sapiens GN=TNNI1 PE=1 SV=3	0	17	12	4	14	4	1	187	21,679	31	4	9,58	found	found
Q92485	Acid sphingomyelinase-like phosphodiesterase 3b OS=Homo sapiens GN=SMPDL3B PE=1 SV=2	0,000656167979002625	3	2,1978021978022	1	7	1	1	455	50,781	10,151558637619	1	5,64	found	found
P02511	Alpha-crystallin B chain OS=Homo sapiens GN=CRYAB PE=1 SV=2	0	23	51	7	23	7	1	175	20,146	28,496968626976	7	7,33	found	found
O75746	Calcium-binding mitochondrial carrier protein Aralar1 OS=Homo sapiens GN=SLC25A12 PE=1 SV=2	0	16	10	6	14	2	1	678	74,715	12	6	8,38	found	found
Q02750	Dual specificity mitogen-activated protein kinase kinase 1 OS=Homo sapiens GN=MAP2K1 PE=1 SV=2	0	5	5	2	8	2	1	393	43,411	8,0804603099823	2	6,62	found	found
P51648-2	Isoform 2 of Fatty aldehyde dehydrogenase OS=Homo sapiens GN=ALDH3A2	0	7	6	3	8	3	1	508	57,633	8	3	8,92	found	found
P22570-3	Isoform 3 of NADPH:adrenodoxin oxidoreductase, mitochondrial OS=Homo sapiens GN=FDXR	0	5	3	2	7	2	1	534	58,267	9	2	7,87	found	found
O00429-6	Isoform 6 of Dynamin-1-like protein OS=Homo sapiens GN=DNM1L	0,00735853844201979	2	0,934579439252336	1	7	1	1	749	83,347	9	1	7,08	found	found
P11047	Laminin subunit gamma-1 OS=Homo sapiens GN=LAMC1 PE=1 SV=3	0	10	2	3	8	3	1	1609	177,489	5	3	5,12	found	found
O96000	NADH dehydrogenase [ubiquinone] 1 beta subcomplex subunit 10 OS=Homo sapiens GN=NDUFB10 PE=1 SV=3	0	11	30	4	8	4	1	172	20,763	2	4	8,48	found	found
P03891	NADH-ubiquinone oxidoreductase chain 2 OS=Homo sapiens GN=MT-ND2 PE=1 SV=2	0,00348432055749129	3	7	1	7	1	1	347	38,935	2	1	9,83	found	found
Q9H1J7	Protein Wnt-5b OS=Homo sapiens GN=WNT5B PE=2 SV=2	0	6	6	2	9	2	1	359	40,297	17	2	8,4	found	found
Q9Y490	Talin-1 OS=Homo sapiens GN=TLN1 PE=1 SV=3	0	11	1	4	9	4	1	2541	269,599	10	4	6,07	found	found
P26640	Valine--tRNA ligase OS=Homo sapiens GN=VARS PE=1 SV=4	0	8	3	3	8	3	1	1264	140,387	4	3	7,59	found	found
Q00341	Vigilin OS=Homo sapiens GN=HDLBP PE=1 SV=2	0	13	3	4	11	4	1	1268	141,368	18	4	6,87	found	found
P35222	Catenin beta-1 OS=Homo sapiens GN=CTNNB1 PE=1 SV=1	0	21	9	5	21	4	1	781	85,442	36	5	5,86	found	found
Q9Y678	Coatomer subunit gamma-1 OS=Homo sapiens GN=COPG1 PE=1 SV=1	0	18	8	5	19	4	1	874	97,655	14	5	5,47	found	found
Q96A33	Coiled-coil domain-containing protein 47 OS=Homo sapiens GN=CCDC47 PE=1 SV=1	0,000656167979002625	3	3	1	8	1	1	483	55,838	6	1	4,87	found	found
Q13363	C-terminal-binding protein 1 OS=Homo sapiens GN=CTBP1 PE=1 SV=2	0	5	3	2	19	1	1	440	47,505	31,648943066597	2	6,77	found	found
Q96F07	Cytoplasmic FMR1-interacting protein 2 OS=Homo sapiens GN=CYFIP2 PE=1 SV=2	0	8,3015530861395	2	3	11	3	1	1278	148,302	5	3	7,31	found	found
Q7Z6Z7	E3 ubiquitin-protein ligase HUWE1 OS=Homo sapiens GN=HUWE1 PE=1 SV=3	0	7	0,457247370827618	2	12	2	1	4374	481,589	22	2	5,22	found	found
P06396	Gelsolin OS=Homo sapiens GN=GSN PE=1 SV=1	0	9	4	4	9	4	1	782	85,644	3	4	6,28	found	found
P11216	Glycogen phosphorylase, brain form OS=Homo sapiens GN=PYGB PE=1 SV=5	0	22	12	8	12	7	1	843	96,635	11	8	6,86	found	found
Q9H3K2	Growth hormone-inducible transmembrane protein OS=Homo sapiens GN=GHITM PE=1 SV=2	0	12	15	4	8	4	1	345	37,181	7	4	9,94	found	found
Q92522	Histone H1x OS=Homo sapiens GN=H1FX PE=1 SV=1	0	10	7	2	11	2	1	213	22,474	20,659579873085	2	10,76	found	found
Q6FI13	Histone H2A type 2-A OS=Homo sapiens GN=HIST2H2AA3 PE=1 SV=3	0	16	49	4	50	2	1	130	14,087	81	4	10,9	found	found
P84243	Histone H3.3 OS=Homo sapiens GN=H3F3A PE=1 SV=2	0	12	44	5	60	1	1	136	15,319	86	5	11,27	found	found
Q86YZ3	Hornerin OS=Homo sapiens GN=HRNR PE=1 SV=2	0	6	4	2	9	2	1	2850	282,228	8	2	10,04	found	found
Q13418	Integrin-linked protein kinase OS=Homo sapiens GN=ILK PE=1 SV=2	0	10	9	4	10	4	1	452	51,386	6	4	8,07	found	found
Q96CM8-2	Isoform 2 of Acyl-CoA synthetase family member 2, mitochondrial OS=Homo sapiens GN=ACSF2	0	7	5,78125	3	8	3	1	640	70,577	0	3	7,84	found	found
Q5T4S7-2	Isoform 2 of E3 ubiquitin-protein ligase UBR4 OS=Homo sapiens GN=UBR4	0	13	0,730207532667179	4	14	4	1	5204	575,592	14	4	6,01	found	found
Q12873-3	Isoform 3 of Chromodomain-helicase-DNA-binding protein 3 OS=Homo sapiens GN=CHD3	0	10	2	3	10	3	1	2059	232,891	29,488082408905	3	6,23	found	found
Q96AC1-3	Isoform 3 of Fermitin family homolog 2 OS=Homo sapiens GN=FERMT2	0	14,41012026283	5	3	14	3	1	687	78,625	23	3	6,7	found	found
Q04637-9	Isoform 9 of Eukaryotic translation initiation factor 4 gamma 1 OS=Homo sapiens GN=EIF4G1	0	10	2	4	9	4	1	1606	176,128	5	4	5,34	found	found
P33176	Kinesin-1 heavy chain OS=Homo sapiens GN=KIF5B PE=1 SV=1	0	19	5	4	15	4	1	963	109,617	10	4	6,51	found	found
Q9HCC0	Methylcrotonoyl-CoA carboxylase beta chain, mitochondrial OS=Homo sapiens GN=MCCC2 PE=1 SV=1	0	5	4	2	9	2	1	563	61,294	5	2	7,68	found	found
Q16647	Prostacyclin synthase OS=Homo sapiens GN=PTGIS PE=1 SV=1	0	17	19,6	6	13	6	1	500	57,068	6	6	7,31	found	found
Q15436	Protein transport protein Sec23A OS=Homo sapiens GN=SEC23A PE=1 SV=2	0	13	7	5	12	5	1	765	86,105	12	5	7,08	found	found
Q9GZT3	SRA stem-loop-interacting RNA-binding protein, mitochondrial OS=Homo sapiens GN=SLIRP PE=1 SV=1	0	7	31	3	10	3	1	109	12,341	4	3	10,24	found	found
Q9UJZ1	Stomatin-like protein 2, mitochondrial OS=Homo sapiens GN=STOML2 PE=1 SV=1	0	5	7	2	10	2	1	356	38,51	12	2	7,39	found	found
Q9UBT2	SUMO-activating enzyme subunit 2 OS=Homo sapiens GN=UBA2 PE=1 SV=2	0	14	11,25	5	11	5	1	640	71,179	5	5	5,29	found	found
A0AVT1	Ubiquitin-like modifier-activating enzyme 6 OS=Homo sapiens GN=UBA6 PE=1 SV=1	0	11	4	2	9	2	1	1052	117,895	19	2	6,14	found	found
Q9NQ39	Putative 40S ribosomal protein S10-like OS=Homo sapiens GN=RPS10P5 PE=5 SV=1	0,0201856148491879	1	3	1	8	1	1	176	20,108	0	1	10,13	found	found
Q9H845	Acyl-CoA dehydrogenase family member 9, mitochondrial OS=Homo sapiens GN=ACAD9 PE=1 SV=1	0	16	7	5	16	5	1	621	68,717	25,93816614151	5	7,96	found	found
P56134	ATP synthase subunit f, mitochondrial OS=Homo sapiens GN=ATP5J2 PE=1 SV=3	0	7	25,531914893617	2	13	2	1	94	10,911	8	2	9,67	found	found
Q16527	Cysteine and glycine-rich protein 2 OS=Homo sapiens GN=CSRP2 PE=1 SV=3	0	5,7016426076015	14	2	9	2	1	193	20,94	11	2	8,62	found	found
Q08945	FACT complex subunit SSRP1 OS=Homo sapiens GN=SSRP1 PE=1 SV=1	0	9	5	3	12	3	1	709	81,024	21	3	6,87	found	found
P02751-15	Isoform 15 of Fibronectin OS=Homo sapiens GN=FN1	0	9	1	3	10	3	1	2477	272,15	13,059318780899	3	5,5	found	found
Q9P0L0-2	Isoform 2 of Vesicle-associated membrane protein-associated protein A OS=Homo sapiens GN=VAPA	0	18	5	2	19	2	1	294	32,593	20	2	8,91	found	found
P20700	Lamin-B1 OS=Homo sapiens GN=LMNB1 PE=1 SV=2	0	19	8	7	27	4	1	586	66,368	33	7	5,16	found	found
O95202	LETM1 and EF-hand domain-containing protein 1, mitochondrial OS=Homo sapiens GN=LETM1 PE=1 SV=1	0	14	9	5	16	5	1	739	83,302	20	5	6,7	found	found
O43684	Mitotic checkpoint protein BUB3 OS=Homo sapiens GN=BUB3 PE=1 SV=1	0	7	7	3	12	3	1	328	37,131	9	3	6,84	found	found
Q53GQ0	Very-long-chain 3-oxoacyl-CoA reductase OS=Homo sapiens GN=HSD17B12 PE=1 SV=2	0	8	11	3	10	3	1	312	34,302	2	3	9,32	found	found
O00232	26S proteasome non-ATPase regulatory subunit 12 OS=Homo sapiens GN=PSMD12 PE=1 SV=3	0	9	6	3	13	3	1	456	52,871	22	3	7,65	found	found
P42765	3-ketoacyl-CoA thiolase, mitochondrial OS=Homo sapiens GN=ACAA2 PE=1 SV=2	0	8	10,831234256927	3	13	3	1	397	41,898	3	3	8,09	found	found
O95831	Apoptosis-inducing factor 1, mitochondrial OS=Homo sapiens GN=AIFM1 PE=1 SV=1	0	12	8	4	16	4	1	613	66,859	12	4	8,95	found	found
P46977	Dolichyl-diphosphooligosaccharide--protein glycosyltransferase subunit STT3A OS=Homo sapiens GN=STT3A PE=1 SV=2	0	14	5	4	22	4	1	705	80,477	20	4	8,07	found	found
Q969X5	Endoplasmic reticulum-Golgi intermediate compartment protein 1 OS=Homo sapiens GN=ERGIC1 PE=1 SV=1	0	11	18	4	12	4	1	290	32,571	10	4	7,06	found	found
Q9Y5B9	FACT complex subunit SPT16 OS=Homo sapiens GN=SUPT16H PE=1 SV=1	0	6	1	2	11	2	1	1047	119,838	19	2	5,66	found	found
O94925	Glutaminase kidney isoform, mitochondrial OS=Homo sapiens GN=GLS PE=1 SV=1	0	5	2	2	11	2	1	669	73,414	3	2	7,77	found	found
Q13838-2	Isoform 2 of Spliceosome RNA helicase DDX39B OS=Homo sapiens GN=DDX39B	0	39	36	15	58	8	1	443	50,647	11	15	5,88	found	found
Q9Y282-3	Isoform 3 of Endoplasmic reticulum-Golgi intermediate compartment protein 3 OS=Homo sapiens GN=ERGIC3	0	8	4	3	13	3	1	388	43,744	12	3	6,04	found	found
P51654-3	Isoform 3 of Glypican-3 OS=Homo sapiens GN=GPC3	0	3	2,1558872305141	1	10	1	1	603	68,369	20	1	6,43	found	found
P12814-4	Isoform 4 of Alpha-actinin-1 OS=Homo sapiens GN=ACTN1	0	28	16	10	40	6	1	930	107,074	38,38498878479	10	5,58	found	found
P37268	Squalene synthase OS=Homo sapiens GN=FDFT1 PE=1 SV=1	0	21,726387329199	23	7	21	7	1	417	48,084	10	7	6,54	found	found
P84098	60S ribosomal protein L19 OS=Homo sapiens GN=RPL19 PE=1 SV=1	0	5	13,265306122449	2	11	2	1	196	23,451	17	2	11,47	found	found
P12277	Creatine kinase B-type OS=Homo sapiens GN=CKB PE=1 SV=1	0	18	28	6	18	6	1	381	42,617	7	6	5,59	found	found
Q86VP6	Cullin-associated NEDD8-dissociated protein 1 OS=Homo sapiens GN=CAND1 PE=1 SV=2	0	6	1,6260162601626	2	12	2	1	1230	136,289	20	2	5,78	found	found
P35520-2	Isoform 2 of Cystathionine beta-synthase OS=Homo sapiens GN=CBS	0	10	9	4	15	4	1	565	61,824	13	4	6,44	found	found
Q14240-2	Isoform 2 of Eukaryotic initiation factor 4A-II OS=Homo sapiens GN=EIF4A2	0	28	27	9	59	1	1	408	46,46	46	9	5,48	found	found
P06744-2	Isoform 2 of Glucose-6-phosphate isomerase OS=Homo sapiens GN=GPI	0	29	26	10	29	10	1	569	64,284	29	10	8,91	found	found
O43390-2	Isoform 2 of Heterogeneous nuclear ribonucleoprotein R OS=Homo sapiens GN=HNRNPR	0	16	11	6	17	5	1	636	71,17	3	6	8,13	found	found
P26440	Isovaleryl-CoA dehydrogenase, mitochondrial OS=Homo sapiens GN=IVD PE=1 SV=1	0	9	6	3	15	3	1	423	46,29	12	3	8,19	found	found
P42167	Lamina-associated polypeptide 2, isoforms beta/gamma OS=Homo sapiens GN=TMPO PE=1 SV=2	0	11	8	4	18	3	1	454	50,639	13,48961353302	4	9,38	found	found
P36776	Lon protease homolog, mitochondrial OS=Homo sapiens GN=LONP1 PE=1 SV=2	0	24	11	10	25	10	1	959	106,422	18	10	6,39	found	found
O43615	Mitochondrial import inner membrane translocase subunit TIM44 OS=Homo sapiens GN=TIMM44 PE=1 SV=2	0	15	11	5	18	5	1	452	51,323	19	5	8,32	found	found
O75439	Mitochondrial-processing peptidase subunit beta OS=Homo sapiens GN=PMPCB PE=1 SV=2	0	6	4	2	11	2	1	489	54,331	7	2	6,83	found	found
P55769	NHP2-like protein 1 OS=Homo sapiens GN=SNU13 PE=1 SV=3	0	13	37,5	4	12	4	1	128	14,165	33,928693652153	4	8,46	found	found
O43143	Pre-mRNA-splicing factor ATP-dependent RNA helicase DHX15 OS=Homo sapiens GN=DHX15 PE=1 SV=2	0	25	13	10	20	10	1	795	90,875	9	10	7,46	found	found
Q9BPW8	Protein NipSnap homolog 1 OS=Homo sapiens GN=NIPSNAP1 PE=1 SV=1	0	25	55	9	20	9	1	284	33,289	9,2670966386795	9	9,31	found	found
Q9Y512	Sorting and assembly machinery component 50 homolog OS=Homo sapiens GN=SAMM50 PE=1 SV=3	0	18,064804737838	16	7	14	7	1	469	51,943	4	7	6,9	found	found
P53597	Succinate--CoA ligase [ADP/GDP-forming] subunit alpha, mitochondrial OS=Homo sapiens GN=SUCLG1 PE=1 SV=4	0	19	25	7	14	7	1	346	36,227	9	7	8,79	found	found
O43657	Tetraspanin-6 OS=Homo sapiens GN=TSPAN6 PE=1 SV=1	0,000656167979002625	3	3	1	11	1	1	245	27,545	10	1	8,1	found	found
Q01995	Transgelin OS=Homo sapiens GN=TAGLN PE=1 SV=4	0	11	25	4	11	4	1	201	22,596	8	4	8,84	found	found
P54577	Tyrosine--tRNA ligase, cytoplasmic OS=Homo sapiens GN=YARS PE=1 SV=4	0	20	13	8	26	8	1	528	59,106	7	8	7,05	found	found
O15145	Actin-related protein 2/3 complex subunit 3 OS=Homo sapiens GN=ARPC3 PE=1 SV=3	0	12	21	4	17	4	1	178	20,533	13	4	8,59	found	found
P12429	Annexin A3 OS=Homo sapiens GN=ANXA3 PE=1 SV=3	0	22,115237622075	27	7	22	7	1	323	36,353	14	7	5,92	found	found
Q14254	Flotillin-2 OS=Homo sapiens GN=FLOT2 PE=1 SV=2	0	12	9	4	21	4	1	428	47,035	33	4	5,25	found	found
P46779-3	Isoform 3 of 60S ribosomal protein L28 OS=Homo sapiens GN=RPL28	0	8,7266139259353	7	2	23	2	1	169	19,136	31	2	10,83	found	found
Q8TDB8-5	Isoform 5 of Solute carrier family 2, facilitated glucose transporter member 14 OS=Homo sapiens GN=SLC2A14	0	14	8	4	31	3	1	535	58,211	29	4	7,23	found	found
P07195	L-lactate dehydrogenase B chain OS=Homo sapiens GN=LDHB PE=1 SV=2	0	29	33	9	38	8	1	334	36,615	53	9	6,05	found	found
P11279	Lysosome-associated membrane glycoprotein 1 OS=Homo sapiens GN=LAMP1 PE=1 SV=3	0	5	5	2	13	2	1	417	44,854	8	2	8,75	found	found
P14174	Macrophage migration inhibitory factor OS=Homo sapiens GN=MIF PE=1 SV=4	0,000656167979002625	3	7	1	15	1	1	115	12,468	13	1	7,88	found	found
P43243	Matrin-3 OS=Homo sapiens GN=MATR3 PE=1 SV=2	0	14	7	6	19	6	1	847	94,565	9	6	6,25	found	found
P40227	T-complex protein 1 subunit zeta OS=Homo sapiens GN=CCT6A PE=1 SV=3	0	11	9	5	17	5	1	531	57,988	20	5	6,68	found	found
P35268	60S ribosomal protein L22 OS=Homo sapiens GN=RPL22 PE=1 SV=2	0	11	39,0625	3	26	3	1	128	14,778	44	3	9,19	found	found
Q9NVI7	ATPase family AAA domain-containing protein 3A OS=Homo sapiens GN=ATAD3A PE=1 SV=2	0	25	17,192429022082	10	26	10	1	634	71,325	13	10	8,98	found	found
Q15392	Delta(24)-sterol reductase OS=Homo sapiens GN=DHCR24 PE=1 SV=2	0	10	7	4	19	4	1	516	60,062	24,909631729126	4	8,16	found	found
P05783	Keratin, type I cytoskeletal 18 OS=Homo sapiens GN=KRT18 PE=1 SV=2	0	17	16	6	38	4	1	430	48,029	59	6	5,45	found	found
O96008	Mitochondrial import receptor subunit TOM40 homolog OS=Homo sapiens GN=TOMM40 PE=1 SV=1	0	15	12	4	23	4	1	361	37,869	15	4	7,25	found	found
P22234	Multifunctional protein ADE2 OS=Homo sapiens GN=PAICS PE=1 SV=3	0	25	27	9	23	9	1	425	47,049	24	9	7,23	found	found
Q9UQ80	Proliferation-associated protein 2G4 OS=Homo sapiens GN=PA2G4 PE=1 SV=3	0	19	20	8	25	8	1	394	43,759	24	8	6,55	found	found
P30048	Thioredoxin-dependent peroxide reductase, mitochondrial OS=Homo sapiens GN=PRDX3 PE=1 SV=3	0	8	12,5	3	17	3	1	256	27,675	15	3	7,78	found	found
P55072	Transitional endoplasmic reticulum ATPase OS=Homo sapiens GN=VCP PE=1 SV=4	0	53,838466813833	29	18	52	18	1	806	89,266	42	18	5,26	found	found
P62701	40S ribosomal protein S4, X isoform OS=Homo sapiens GN=RPS4X PE=1 SV=2	0	31,399550997207	38	10	47	6	1	263	29,579	53	10	10,15	found	found
P46777	60S ribosomal protein L5 OS=Homo sapiens GN=RPL5 PE=1 SV=3	0	20	25	7	30	7	1	297	34,341	26	7	9,72	found	found
P62917	60S ribosomal protein L8 OS=Homo sapiens GN=RPL8 PE=1 SV=2	0	14	24	6	22	6	1	257	28,007	29	6	11,03	found	found
P11586	C-1-tetrahydrofolate synthase, cytoplasmic OS=Homo sapiens GN=MTHFD1 PE=1 SV=3	0	18	8	6	22	6	1	935	101,495	16	6	7,3	found	found
P21333	Filamin-A OS=Homo sapiens GN=FLNA PE=1 SV=4	0	108	15,753683415187	33	107	27	1	2647	280,564	112	33	6,06	found	found
Q14195-2	Isoform LCRMP-4 of Dihydropyrimidinase-related protein 3 OS=Homo sapiens GN=DPYSL3	0	22	13	8	25	8	1	684	73,865	16	8	6,35	found	found
Q9P258	Protein RCC2 OS=Homo sapiens GN=RCC2 PE=1 SV=2	0	19,238748353436	13	6	24	6	1	522	56,049	8	6	8,78	found	found
P17987	T-complex protein 1 subunit alpha OS=Homo sapiens GN=TCP1 PE=1 SV=1	0	34,916025593079	20	11	37	11	1	556	60,306	29,955681681633	11	6,11	found	found
Q9BQA1	Methylosome protein 50 OS=Homo sapiens GN=WDR77 PE=1 SV=1	0	8	8	2	9	2	1	342	36,701	11	2	5,17	found	found
P11055	Myosin-3 OS=Homo sapiens GN=MYH3 PE=1 SV=3	0	71	10	20	95	1	1	1940	223,766	135	20	5,81	found	found
Q702N8	Xin actin-binding repeat-containing protein 1 OS=Homo sapiens GN=XIRP1 PE=1 SV=1	0	21	4	7	18	7	1	1843	198,439	21	7	6,15	found	found
P35609	Alpha-actinin-2 OS=Homo sapiens GN=ACTN2 PE=1 SV=1	0	40	22	13	47	9	1	894	103,788	57	13	5,45	found	found
P98160	Basement membrane-specific heparan sulfate proteoglycan core protein OS=Homo sapiens GN=HSPG2 PE=1 SV=4	0	13	0,728763379640173	3	17	3	1	4391	468,532	23	3	6,51	found	found
O96005	Cleft lip and palate transmembrane protein 1 OS=Homo sapiens GN=CLPTM1 PE=1 SV=1	0	5	4	2	8	2	1	669	76,048	11	2	6,3	found	found
P02462	Collagen alpha-1(IV) chain OS=Homo sapiens GN=COL4A1 PE=1 SV=3	0	9	1	3	12	3	1	1669	160,514	20	3	8,28	found	found
P36507	Dual specificity mitogen-activated protein kinase kinase 2 OS=Homo sapiens GN=MAP2K2 PE=1 SV=1	0	6	5,25	2	11	2	1	400	44,396	14	2	6,55	found	found
Q9Y305-4	Isoform 4 of Acyl-coenzyme A thioesterase 9, mitochondrial OS=Homo sapiens GN=ACOT9	0	7,4541819897542	8	3	8	3	1	448	50,818	11	3	8,53	found	found
P08590	Myosin light chain 3 OS=Homo sapiens GN=MYL3 PE=1 SV=3	0	7	15	3	12	3	1	195	21,918	14	3	5,1	found	found
P12829	Myosin light chain 4 OS=Homo sapiens GN=MYL4 PE=1 SV=3	0	6	11	2	10	2	1	197	21,551	19	2	5,03	found	found
P13533	Myosin-6 OS=Homo sapiens GN=MYH6 PE=1 SV=5	0	247	35	67	306	11	1	1939	223,596	439,21586060524	67	5,73	found	found
P21980	Protein-glutamine gamma-glutamyltransferase 2 OS=Homo sapiens GN=TGM2 PE=1 SV=2	0	13	8	5	12	5	1	687	77,28	13	5	5,22	found	found
O00330	Pyruvate dehydrogenase protein X component, mitochondrial OS=Homo sapiens GN=PDHX PE=1 SV=3	0	7,4345980340106	2	1	13	1	1	501	54,089	31,824430346489	1	8,66	found	found
Q8NBX0	Saccharopine dehydrogenase-like oxidoreductase OS=Homo sapiens GN=SCCPDH PE=1 SV=1	0	13	16	3	14	3	1	429	47,121	33	3	9,14	found	found
P32418	Sodium/calcium exchanger 1 OS=Homo sapiens GN=SLC8A1 PE=1 SV=3	0	10	4,0082219938335	4	9	4	1	973	108,478	12,241605758667	4	5	found	found
P62081	40S ribosomal protein S7 OS=Homo sapiens GN=RPS7 PE=1 SV=1	0	9,6240235944108	26	4	11	4	1	194	22,113	8	4	10,1	found	found
P43155	Carnitine O-acetyltransferase OS=Homo sapiens GN=CRAT PE=1 SV=5	0	15	6	4	15	4	1	626	70,812	22	4	8,44	found	found
P50461	Cysteine and glycine-rich protein 3 OS=Homo sapiens GN=CSRP3 PE=1 SV=1	0	5	4	1	11	1	1	194	20,955	17	1	8,54	found	found
O00303	Eukaryotic translation initiation factor 3 subunit F OS=Homo sapiens GN=EIF3F PE=1 SV=1	0	10	12	3	15	3	1	357	37,54	24,688215136528	3	5,45	found	found
O14980	Exportin-1 OS=Homo sapiens GN=XPO1 PE=1 SV=1	0	12	7	5	12	5	1	1071	123,306	7	5	6,06	found	found
Q9BUJ2	Heterogeneous nuclear ribonucleoprotein U-like protein 1 OS=Homo sapiens GN=HNRNPUL1 PE=1 SV=2	0	8	5	3	10	3	1	856	95,679	0	3	6,92	found	found
P52789	Hexokinase-2 OS=Homo sapiens GN=HK2 PE=1 SV=2	0	22	8	7	26	5	1	917	102,313	7	7	6,05	found	found
P08237-3	Isoform 3 of ATP-dependent 6-phosphofructokinase, muscle type OS=Homo sapiens GN=PFKM	0	24,120994995377	11	9	36	6	1	851	93,194	34	9	7,97	found	found
P49821	NADH dehydrogenase [ubiquinone] flavoprotein 1, mitochondrial OS=Homo sapiens GN=NDUFV1 PE=1 SV=4	0	15	14	5	15	5	1	464	50,785	14	5	8,21	found	found
Q02790	Peptidyl-prolyl cis-trans isomerase FKBP4 OS=Homo sapiens GN=FKBP4 PE=1 SV=3	0	5	3,7037037037037	2	11	2	1	459	51,772	14	2	5,43	found	found
Q9Y230	RuvB-like 2 OS=Homo sapiens GN=RUVBL2 PE=1 SV=3	0	18	18	7	13	7	1	463	51,125	4	7	5,64	found	found
P30153	Serine/threonine-protein phosphatase 2A 65 kDa regulatory subunit A alpha isoform OS=Homo sapiens GN=PPP2R1A PE=1 SV=4	0	25	17	7	21	7	1	589	65,267	26,130081653595	7	5,11	found	found
P21912	Succinate dehydrogenase [ubiquinone] iron-sulfur subunit, mitochondrial OS=Homo sapiens GN=SDHB PE=1 SV=3	0	6	11	3	11	3	1	280	31,609	5	3	8,76	found	found
Q9BUF5	Tubulin beta-6 chain OS=Homo sapiens GN=TUBB6 PE=1 SV=1	0	46	31,390134529148	12	223	4	1	446	49,825	246	12	4,88	found	found
Q9P253	Vacuolar protein sorting-associated protein 18 homolog OS=Homo sapiens GN=VPS18 PE=1 SV=2	0	6,9114072736538	2	2	10	2	1	973	110,116	19	2	6,07	found	found
P12956	X-ray repair cross-complementing protein 6 OS=Homo sapiens GN=XRCC6 PE=1 SV=2	0	14	11	5	12	5	1	609	69,799	1	5	6,64	found	found
Q16698	2,4-dienoyl-CoA reductase, mitochondrial OS=Homo sapiens GN=DECR1 PE=1 SV=1	0	13	13	4	19	4	1	335	36,045	26,760421037674	4	9,28	found	found
O75084	Frizzled-7 OS=Homo sapiens GN=FZD7 PE=1 SV=2	0	7	4	3	13	3	1	574	63,578	17,330916762352	3	7,81	found	found
O60313-2	Isoform 2 of Dynamin-like 120 kDa protein, mitochondrial OS=Homo sapiens GN=OPA1	0	19	5	5	24	5	1	997	115,812	38	5	7,87	found	found
P40925-3	Isoform 3 of Malate dehydrogenase, cytoplasmic OS=Homo sapiens GN=MDH1	0	11	12,5	4	11	4	1	352	38,603	7	4	7,71	found	found
P55809	Succinyl-CoA:3-ketoacid coenzyme A transferase 1, mitochondrial OS=Homo sapiens GN=OXCT1 PE=1 SV=1	0	8	6	3	14	3	1	520	56,122	25	3	7,46	found	found
P02649	Apolipoprotein E OS=Homo sapiens GN=APOE PE=1 SV=1	0	33	36	11	42	11	1	317	36,132	27	11	5,73	found	found
P30038	Delta-1-pyrroline-5-carboxylate dehydrogenase, mitochondrial OS=Homo sapiens GN=ALDH4A1 PE=1 SV=3	0	13,748072017744	8	4	16	4	1	563	61,681	22	4	8,07	found	found
P33991	DNA replication licensing factor MCM4 OS=Homo sapiens GN=MCM4 PE=1 SV=5	0	21	10	7	17	7	1	863	96,498	20	7	6,74	found	found
P13804	Electron transfer flavoprotein subunit alpha, mitochondrial OS=Homo sapiens GN=ETFA PE=1 SV=1	0	20	29	7	23	7	1	333	35,058	22	7	8,38	found	found
P30084	Enoyl-CoA hydratase, mitochondrial OS=Homo sapiens GN=ECHS1 PE=1 SV=4	0	18	29	6	16	6	1	290	31,367	8	6	8,07	found	found
P27105	Erythrocyte band 7 integral membrane protein OS=Homo sapiens GN=STOM PE=1 SV=3	0	5	5	2	13	2	1	288	31,711	27	2	7,88	found	found
P30042	ES1 protein homolog, mitochondrial OS=Homo sapiens GN=C21orf33 PE=1 SV=3	0	6	7	2	14	2	1	268	28,153	20	2	8,27	found	found
Q7L1Q6-3	Isoform 3 of Basic leucine zipper and W2 domain-containing protein 1 OS=Homo sapiens GN=BZW1	0	7	5	3	15	3	1	451	51,249	13	3	6,62	found	found
P49748-3	Isoform 3 of Very long-chain specific acyl-CoA dehydrogenase, mitochondrial OS=Homo sapiens GN=ACADVL	0	17,519887056843	10	6	16	6	1	678	72,881	20,603745341301	6	8,75	found	found
Q9Y6C9	Mitochondrial carrier homolog 2 OS=Homo sapiens GN=MTCH2 PE=1 SV=1	0	8	11	3	14	3	1	303	33,309	5,2577657699585	3	7,97	found	found
Q6UB35	Monofunctional C1-tetrahydrofolate synthase, mitochondrial OS=Homo sapiens GN=MTHFD1L PE=1 SV=1	0,000656167979002625	3	0,920245398773006	1	11	1	1	978	105,724	17,356728553772	1	8,06	found	found
P30044	Peroxiredoxin-5, mitochondrial OS=Homo sapiens GN=PRDX5 PE=1 SV=4	0	14	30	5	17	5	1	214	22,073	13	5	8,7	found	found
P61106	Ras-related protein Rab-14 OS=Homo sapiens GN=RAB14 PE=1 SV=4	0	18	27,906976744186	6	37	5	1	215	23,882	20	6	6,21	found	found
P61009	Signal peptidase complex subunit 3 OS=Homo sapiens GN=SPCS3 PE=1 SV=1	0	8	15	3	14	3	1	180	20,301	9	3	8,62	found	found
Q15738	Sterol-4-alpha-carboxylate 3-dehydrogenase, decarboxylating OS=Homo sapiens GN=NSDHL PE=1 SV=2	0	8	6	3	13	3	1	373	41,874	11	3	8,06	found	found
P62266	40S ribosomal protein S23 OS=Homo sapiens GN=RPS23 PE=1 SV=3	0	10	16	3	20	3	1	143	15,798	19	3	10,49	found	found
P32969	60S ribosomal protein L9 OS=Homo sapiens GN=RPL9 PE=1 SV=1	0	11	29,6875	4	13	4	1	192	21,85	23	4	9,95	found	found
P30837	Aldehyde dehydrogenase X, mitochondrial OS=Homo sapiens GN=ALDH1B1 PE=1 SV=3	0	14,928003163387	9	5	16	4	1	517	57,17	21	5	6,8	found	found
P07814	Bifunctional glutamate/proline--tRNA ligase OS=Homo sapiens GN=EPRS PE=1 SV=5	0	27	8,2010582010582	10	32	10	1	1512	170,483	21	10	7,33	found	found
P15311	Ezrin OS=Homo sapiens GN=EZR PE=1 SV=4	0	43,521317451759	22	14	64	10	1	586	69,37	103	14	6,27	found	found
P16401	Histone H1.5 OS=Homo sapiens GN=HIST1H1B PE=1 SV=3	0	17	14	4	29	3	1	226	22,566	29	4	10,92	found	found
P0C0S5	Histone H2A.Z OS=Homo sapiens GN=H2AFZ PE=1 SV=2	0	20	53,90625	5	58	3	1	128	13,545	96	5	10,58	found	found
P63241-2	Isoform 2 of Eukaryotic translation initiation factor 5A-1 OS=Homo sapiens GN=EIF5A	0	13,89419753308	23	3	25	3	1	184	20,157	38	3	7,01	found	found
P05787-2	Isoform 2 of Keratin, type II cytoskeletal 8 OS=Homo sapiens GN=KRT8	0	53	32	18	84	11	1	511	56,573	122,86013007164	18	5,43	found	found
Q96HJ9-2	Isoform 2 of Protein FMC1 homolog OS=Homo sapiens GN=FMC1	0	4	3	2	12	2	1	458	54,191	10	2	10,13	found	found
Q15019-2	Isoform 2 of Septin-2 OS=Homo sapiens GN=SEPT2	0	15	15	5	20	5	1	396	45,432	23	5	6,89	found	found
Q9P2J5	Leucine--tRNA ligase, cytoplasmic OS=Homo sapiens GN=LARS PE=1 SV=2	0	29	13	12	23	12	1	1176	134,379	3,5715343952179	12	7,3	found	found
P10620	Microsomal glutathione S-transferase 1 OS=Homo sapiens GN=MGST1 PE=1 SV=1	0	8	26	3	16	3	1	155	17,587	8	3	9,39	found	found
P32119	Peroxiredoxin-2 OS=Homo sapiens GN=PRDX2 PE=1 SV=5	0	9	14	3	24	2	1	198	21,878	22	3	5,97	found	found
Q16822	Phosphoenolpyruvate carboxykinase [GTP], mitochondrial OS=Homo sapiens GN=PCK2 PE=1 SV=3	0	19	12,8125	8	20	8	1	640	70,685	7	8	7,62	found	found
O00592	Podocalyxin OS=Homo sapiens GN=PODXL PE=1 SV=2	0	14	8	5	16	5	1	558	58,599	14	5	5,49	found	found
P0C7P4	Putative cytochrome b-c1 complex subunit Rieske-like protein 1 OS=Homo sapiens GN=UQCRFS1P1 PE=5 SV=1	0	10	18	4	17	4	1	283	30,796	23	4	8,87	found	found
Q9H9B4	Sideroflexin-1 OS=Homo sapiens GN=SFXN1 PE=1 SV=4	0	26	29	8	27	7	1	322	35,596	24	8	9,07	found	found
Q01082	Spectrin beta chain, non-erythrocytic 1 OS=Homo sapiens GN=SPTBN1 PE=1 SV=2	0	29	4	10	28	10	1	2364	274,439	25	10	5,57	found	found
Q01081	Splicing factor U2AF 35 kDa subunit OS=Homo sapiens GN=U2AF1 PE=1 SV=3	0	11,26684893807	18	4	23	4	1	240	27,854	15	4	8,81	found	found
O75643	U5 small nuclear ribonucleoprotein 200 kDa helicase OS=Homo sapiens GN=SNRNP200 PE=1 SV=2	0	26	4,7752808988764	10	23	10	1	2136	244,353	16	10	6,06	found	found
P62888	60S ribosomal protein L30 OS=Homo sapiens GN=RPL30 PE=1 SV=2	0	16	41	5	34	5	1	115	12,776	32	5	9,63	found	found
P18077	60S ribosomal protein L35a OS=Homo sapiens GN=RPL35A PE=1 SV=2	0	8	27	4	20	4	1	110	12,53	16	4	11,06	found	found
P24752	Acetyl-CoA acetyltransferase, mitochondrial OS=Homo sapiens GN=ACAT1 PE=1 SV=1	0	16	11,943793911007	5	23	5	1	427	45,171	29	5	8,85	found	found
P35613	Basigin OS=Homo sapiens GN=BSG PE=1 SV=2	0	15,293035885506	21	6	24	6	1	385	42,174	6	6	5,66	found	found
P27708	CAD protein OS=Homo sapiens GN=CAD PE=1 SV=3	0	25,551856356457	5	10	26	10	1	2225	242,829	12	10	6,46	found	found
P41250	Glycine--tRNA ligase OS=Homo sapiens GN=GARS PE=1 SV=3	0	23	13	7	21	7	1	739	83,113	26,946137547493	7	7,03	found	found
P26639-2	Isoform 2 of Threonine--tRNA ligase, cytoplasmic OS=Homo sapiens GN=TARS	0	17	10	7	18	7	1	756	86,806	2	7	6,77	found	found
sp	Peroxiredoxin-1 OS=Homo sapiens GN=PRDX1 PE=1 SV=1	0	29	58	10	53	8	1	199	22,096	67	10	8,13	found	found
Q6P2Q9	Pre-mRNA-processing-splicing factor 8 OS=Homo sapiens GN=PRPF8 PE=1 SV=2	0	35	7	13	29	13	1	2335	273,427	26	13	8,84	found	found
Q92841	Probable ATP-dependent RNA helicase DDX17 OS=Homo sapiens GN=DDX17 PE=1 SV=2	0	43	22	14	97	6	1	729	80,222	114	14	8,27	found	found
P51149	Ras-related protein Rab-7a OS=Homo sapiens GN=RAB7A PE=1 SV=1	0	13	26	5	22	5	1	207	23,475	12,400196313858	5	6,7	found	found
P48643	T-complex protein 1 subunit epsilon OS=Homo sapiens GN=CCT5 PE=1 SV=1	0	17	16	6	26	6	1	541	59,633	29	6	5,66	found	found
Q5BJF2	Transmembrane protein 97 OS=Homo sapiens GN=TMEM97 PE=1 SV=1	0	7	20	2	13	2	1	176	20,834	28	2	9,38	found	found
P42677	40S ribosomal protein S27 OS=Homo sapiens GN=RPS27 PE=1 SV=3	0	12,491450987056	40	3	17	3	1	84	9,455	16	3	9,45	found	found
Q14974	Importin subunit beta-1 OS=Homo sapiens GN=KPNB1 PE=1 SV=2	0	49	28,310502283105	16	50	16	1	876	97,108	46	16	4,78	found	found
Q92896-2	Isoform 2 of Golgi apparatus protein 1 OS=Homo sapiens GN=GLG1	0	25,028924095269	8	8	27	8	1	1203	137,132	36	8	6,9	found	found
Q15366-3	Isoform 3 of Poly(rC)-binding protein 2 OS=Homo sapiens GN=PCBP2	0	28	41	9	36	7	1	362	38,197	19,451735496521	9	6,79	found	found
Q04837	Single-stranded DNA-binding protein, mitochondrial OS=Homo sapiens GN=SSBP1 PE=1 SV=1	0	15	34	5	19	5	1	148	17,249	18	5	9,6	found	found
Q13263	Transcription intermediary factor 1-beta OS=Homo sapiens GN=TRIM28 PE=1 SV=5	0	29	14	10	27	10	1	835	88,493	18	10	5,77	found	found
P49207	60S ribosomal protein L34 OS=Homo sapiens GN=RPL34 PE=1 SV=3	0	11	28	4	24	4	1	117	13,284	15	4	11,47	found	found
Q9UDR5	Alpha-aminoadipic semialdehyde synthase, mitochondrial OS=Homo sapiens GN=AASS PE=1 SV=1	0	20	11	8	40	8	1	926	102,066	33	8	6,64	found	found
P56385	ATP synthase subunit e, mitochondrial OS=Homo sapiens GN=ATP5I PE=1 SV=2	0	13	62	4	25	4	1	69	7,928	19	4	9,35	found	found
P53396	ATP-citrate synthase OS=Homo sapiens GN=ACLY PE=1 SV=3	0	38	15	14	37	14	1	1101	120,762	21,418349146843	14	7,33	found	found
P60981	Destrin OS=Homo sapiens GN=DSTN PE=1 SV=3	0	17	30	5	20	4	1	165	18,493	29	5	7,85	found	found
P12268	Inosine-5'-monophosphate dehydrogenase 2 OS=Homo sapiens GN=IMPDH2 PE=1 SV=2	0	24	24	8	35	8	1	514	55,77	34	8	6,9	found	found
Q16836-2	Isoform 2 of Hydroxyacyl-coenzyme A dehydrogenase, mitochondrial OS=Homo sapiens GN=HADH	0	15	28	6	21	6	1	390	42,113	7	6	9,26	found	found
P30041	Peroxiredoxin-6 OS=Homo sapiens GN=PRDX6 PE=1 SV=3	0	20,587847984191	38	8	34	8	1	224	25,019	5	8	6,38	found	found
P50454	Serpin H1 OS=Homo sapiens GN=SERPINH1 PE=1 SV=2	0	48	45,933014354067	15	61	15	1	418	46,411	68,754759311676	15	8,69	found	found
P23246	Splicing factor, proline- and glutamine-rich OS=Homo sapiens GN=SFPQ PE=1 SV=2	0	41	20	11	59	10	1	707	76,102	63,882804274559	11	9,44	found	found
Q99832	T-complex protein 1 subunit eta OS=Homo sapiens GN=CCT7 PE=1 SV=2	0	27	19	9	25	9	1	543	59,329	20	9	7,65	found	found
O14874	[3-methyl-2-oxobutanoate dehydrogenase [lipoamide]] kinase, mitochondrial OS=Homo sapiens GN=BCKDK PE=1 SV=2	0	3	4	1	8	1	1	412	46,331	18	1	8,82	found	found
P45974	Ubiquitin carboxyl-terminal hydrolase 5 OS=Homo sapiens GN=USP5 PE=1 SV=2	0	18	9	6	13	6	1	858	95,725	10	6	5,03	found	found
P51114	Fragile X mental retardation syndrome-related protein 1 OS=Homo sapiens GN=FXR1 PE=1 SV=3	0	17	12	6	13	6	1	621	69,678	7	6	6,15	found	found
Q13557-11	Isoform Delta 11 of Calcium/calmodulin-dependent protein kinase type II subunit delta OS=Homo sapiens GN=CAMK2D	0	16	14	6	13	6	1	524	59,114	13	6	7,56	found	found
P55268	Laminin subunit beta-2 OS=Homo sapiens GN=LAMB2 PE=1 SV=2	0	9	2	4	13	4	1	1798	195,854	20	4	6,52	found	found
Q9BXP5	Serrate RNA effector molecule homolog OS=Homo sapiens GN=SRRT PE=1 SV=1	0	9	3	3	14	3	1	876	100,604	9	3	5,96	found	found
O00483	Cytochrome c oxidase subunit NDUFA4 OS=Homo sapiens GN=NDUFA4 PE=1 SV=1	0	5	24	2	11	2	1	81	9,364	10	2	9,38	found	found
P47897	Glutamine--tRNA ligase OS=Homo sapiens GN=QARS PE=1 SV=1	0	14	5	4	12	4	1	775	87,743	13	4	7,15	found	found
P52597	Heterogeneous nuclear ribonucleoprotein F OS=Homo sapiens GN=HNRNPF PE=1 SV=3	0	18	22	6	41	4	1	415	45,643	45	6	5,58	found	found
Q8WZ42-12	Isoform 12 of Titin OS=Homo sapiens GN=TTN	0	268	3,1063321385902	97	222	97	1	35991	3992,135	228	97	6,39	found	found
O15230	Laminin subunit alpha-5 OS=Homo sapiens GN=LAMA5 PE=1 SV=8	0	10	1	4	17	4	1	3695	399,479	28	4	7,02	found	found
Q8IWX7	Protein unc-45 homolog B OS=Homo sapiens GN=UNC45B PE=1 SV=1	0	32	11	10	25	10	1	931	103,667	31	10	7,81	found	found
Q9Y4P3	Transducin beta-like protein 2 OS=Homo sapiens GN=TBL2 PE=1 SV=1	0	9	7	4	15	4	1	447	49,766	15	4	9,44	found	found
Q13200	26S proteasome non-ATPase regulatory subunit 2 OS=Homo sapiens GN=PSMD2 PE=1 SV=3	0	15,395126734565	7,9295154185022	5	25	5	1	908	100,136	43	5	5,2	found	found
O95782	AP-2 complex subunit alpha-1 OS=Homo sapiens GN=AP2A1 PE=1 SV=3	0	7	3	3	13	3	1	977	107,478	11	3	7,03	found	found
P68400	Casein kinase II subunit alpha OS=Homo sapiens GN=CSNK2A1 PE=1 SV=1	0	16	11	4	21	4	1	391	45,115	17	4	7,74	found	found
O75306	NADH dehydrogenase [ubiquinone] iron-sulfur protein 2, mitochondrial OS=Homo sapiens GN=NDUFS2 PE=1 SV=2	0	13	10	5	19	5	1	463	52,512	7	5	7,55	found	found
P48556	26S proteasome non-ATPase regulatory subunit 8 OS=Homo sapiens GN=PSMD8 PE=1 SV=2	0	4,7508971734337	4	2	13	2	1	350	39,587	1	2	9,7	found	found
Q06210	Glutamine--fructose-6-phosphate aminotransferase [isomerizing] 1 OS=Homo sapiens GN=GFPT1 PE=1 SV=3	0	15	7	4	16	4	1	699	78,756	20,616491317749	4	7,11	found	found
P68431	Histone H3.1 OS=Homo sapiens GN=HIST1H3A PE=1 SV=2	0	16	44	5	74	1	1	136	15,394	118	5	11,12	found	found
Q71DI3	Histone H3.2 OS=Homo sapiens GN=HIST2H3A PE=1 SV=3	0	16	44	5	68	1	1	136	15,379	92	5	11,27	found	found
P49588-2	Isoform 2 of Alanine--tRNA ligase, cytoplasmic OS=Homo sapiens GN=AARS	0	21	7	8	27	8	1	992	109,249	30	8	5,57	found	found
P11310-2	Isoform 2 of Medium-chain specific acyl-CoA dehydrogenase, mitochondrial OS=Homo sapiens GN=ACADM	0	30	22	10	25	10	1	425	46,99	22	10	8,31	found	found
P28331-2	Isoform 2 of NADH-ubiquinone oxidoreductase 75 kDa subunit, mitochondrial OS=Homo sapiens GN=NDUFS1	0	26	18	10	21	10	1	741	80,945	15	10	6,64	found	found
P14923	Junction plakoglobin OS=Homo sapiens GN=JUP PE=1 SV=3	0	30	15	7	27	6	1	745	81,693	43	7	6,14	found	found
P48449	Lanosterol synthase OS=Homo sapiens GN=LSS PE=1 SV=1	0	6	2	2	17	2	1	732	83,255	24	2	6,61	found	found
O75323	Protein NipSnap homolog 2 OS=Homo sapiens GN=NIPSNAP2 PE=1 SV=1	0	14	24	5	24	5	1	286	33,721	11	5	9,36	found	found
P11177	Pyruvate dehydrogenase E1 component subunit beta, mitochondrial OS=Homo sapiens GN=PDHB PE=1 SV=3	0	21	22	6	31	6	1	359	39,208	40,193031668663	6	6,65	found	found
P63104	14-3-3 protein zeta/delta OS=Homo sapiens GN=YWHAZ PE=1 SV=1	0	24	27	6	36	3	1	245	27,728	66	6	4,79	found	found
O43242	26S proteasome non-ATPase regulatory subunit 3 OS=Homo sapiens GN=PSMD3 PE=1 SV=2	0	11	9	5	17	5	1	534	60,939	8	5	8,44	found	found
Q14566	DNA replication licensing factor MCM6 OS=Homo sapiens GN=MCM6 PE=1 SV=1	0	15	6	6	22	6	1	821	92,831	23	6	5,41	found	found
O43837	Isocitrate dehydrogenase [NAD] subunit beta, mitochondrial OS=Homo sapiens GN=IDH3B PE=1 SV=2	0	14	14,025974025974	5	20	5	1	385	42,157	30,858606338501	5	8,46	found	found
O95573	Long-chain-fatty-acid--CoA ligase 3 OS=Homo sapiens GN=ACSL3 PE=1 SV=3	0	26,927884277374	15	9	18	9	1	720	80,368	3	9	8,38	found	found
Q02252	Methylmalonate-semialdehyde dehydrogenase [acylating], mitochondrial OS=Homo sapiens GN=ALDH6A1 PE=1 SV=2	0	33	25	12	35	12	1	535	57,803	24	12	8,5	found	found
P31949	Protein S100-A11 OS=Homo sapiens GN=S100A11 PE=1 SV=2	0	15	74	5	19	5	1	105	11,733	29	5	7,12	found	found
P31040	Succinate dehydrogenase [ubiquinone] flavoprotein subunit, mitochondrial OS=Homo sapiens GN=SDHA PE=1 SV=2	0	22	11,144578313253	7	27	7	1	664	72,645	22	7	7,39	found	found
Q9Y4L1	Hypoxia up-regulated protein 1 OS=Homo sapiens GN=HYOU1 PE=1 SV=1	0	23	11	8	29	8	1	999	111,266	29	8	5,22	found	found
P00387-3	Isoform 3 of NADH-cytochrome b5 reductase 3 OS=Homo sapiens GN=CYB5R3	0	12	19	4	23	4	1	334	38,202	12	4	6,9	found	found
P60866-2	Isoform 2 of 40S ribosomal protein S20 OS=Homo sapiens GN=RPS20	0	12	21	3	36	3	1	142	15,995	24	3	9,32	found	found
P11166	Solute carrier family 2, facilitated glucose transporter member 1 OS=Homo sapiens GN=SLC2A1 PE=1 SV=2	0	14	11	5	29	4	1	492	54,049	37	5	8,72	found	found
P22314	Ubiquitin-like modifier-activating enzyme 1 OS=Homo sapiens GN=UBA1 PE=1 SV=3	0	20,059027904498	9	7	23	7	1	1058	117,774	30	7	5,76	found	found
P62333	26S protease regulatory subunit 10B OS=Homo sapiens GN=PSMC6 PE=1 SV=1	0	31	31	11	34	11	1	389	44,145	35	11	7,49	found	found
P25398	40S ribosomal protein S12 OS=Homo sapiens GN=RPS12 PE=1 SV=3	0	12	28	4	21	4	1	132	14,505	17	4	7,21	found	found
P62263	40S ribosomal protein S14 OS=Homo sapiens GN=RPS14 PE=1 SV=3	0	19	39	6	29	6	1	151	16,263	35	6	10,05	found	found
P62241	40S ribosomal protein S8 OS=Homo sapiens GN=RPS8 PE=1 SV=2	0	31	51	9	57	9	1	208	24,19	44	9	10,32	found	found
P36578	60S ribosomal protein L4 OS=Homo sapiens GN=RPL4 PE=1 SV=5	0	33	27	11	55	11	1	427	47,667	58	11	11,06	found	found
P23526	Adenosylhomocysteinase OS=Homo sapiens GN=AHCY PE=1 SV=4	0	25	22	9	40	9	1	432	47,685	38	9	6,34	found	found
P23528	Cofilin-1 OS=Homo sapiens GN=CFL1 PE=1 SV=3	0	27	59	8	36	7	1	166	18,491	49	8	8,09	found	found
O43175	D-3-phosphoglycerate dehydrogenase OS=Homo sapiens GN=PHGDH PE=1 SV=4	0	53	44	15	72	15	1	533	56,614	57	15	6,71	found	found
P15924	Desmoplakin OS=Homo sapiens GN=DSP PE=1 SV=3	0	88	11	28	85	28	1	2871	331,569	115	28	6,81	found	found
P55060	Exportin-2 OS=Homo sapiens GN=CSE1L PE=1 SV=3	0	16	7	7	27	7	1	971	110,346	13	7	5,77	found	found
P34932	Heat shock 70 kDa protein 4 OS=Homo sapiens GN=HSPA4 PE=1 SV=4	0	36	17	12	37	12	1	840	94,271	29	12	5,19	found	found
P49419-2	Isoform 2 of Alpha-aminoadipic semialdehyde dehydrogenase OS=Homo sapiens GN=ALDH7A1	0	23	24,26614481409	9	32	9	1	511	55,331	20	9	6,86	found	found
P17858-2	Isoform 2 of ATP-dependent 6-phosphofructokinase, liver type OS=Homo sapiens GN=PFKL	0	27,23330634079	14	9	47	5	1	827	90,145	49	9	7,83	found	found
P07900-2	Isoform 2 of Heat shock protein HSP 90-alpha OS=Homo sapiens GN=HSP90AA1	0	69	30	22	142	13	1	854	98,099	175	22	5,16	found	found
P35579	Myosin-9 OS=Homo sapiens GN=MYH9 PE=1 SV=4	0	94	18	31	103	23	1	1960	226,392	87	31	5,6	found	found
Q15233	Non-POU domain-containing octamer-binding protein OS=Homo sapiens GN=NONO PE=1 SV=4	0	40	24,203821656051	11	76	10	1	471	54,197	94	11	8,95	found	found
P23284	Peptidyl-prolyl cis-trans isomerase B OS=Homo sapiens GN=PPIB PE=1 SV=2	0	17	29	6	42	6	1	216	23,728	46	6	9,41	found	found
Q13247	Serine/arginine-rich splicing factor 6 OS=Homo sapiens GN=SRSF6 PE=1 SV=2	0	16	9	4	34	4	1	344	39,563	48	4	11,43	found	found
P78371	T-complex protein 1 subunit beta OS=Homo sapiens GN=CCT2 PE=1 SV=4	0	17	17	6	26	6	1	535	57,452	16	6	6,46	found	found
P02786	Transferrin receptor protein 1 OS=Homo sapiens GN=TFRC PE=1 SV=2	0	23,150694764085	13	9	26	9	1	760	84,818	18	9	6,61	found	found
P68363	Tubulin alpha-1B chain OS=Homo sapiens GN=TUBA1B PE=1 SV=1	0	109	75,609756097561	26	330	2	1	451	50,12	465	26	5,06	found	found
Q8NB12	Histone-lysine N-methyltransferase SMYD1 OS=Homo sapiens GN=SMYD1 PE=1 SV=1	0	13	8	4	15	4	1	490	56,58	17	4	7,09	found	found
Q14192	Four and a half LIM domains protein 2 OS=Homo sapiens GN=FHL2 PE=1 SV=3	0	10	8	2	16	2	1	279	32,171	25	2	7,55	found	found
Q01449	Myosin regulatory light chain 2, atrial isoform OS=Homo sapiens GN=MYL7 PE=1 SV=1	0	24	61	8	18	8	1	175	19,436	22	8	4,88	found	found
Q9NTJ5	Phosphatidylinositide phosphatase SAC1 OS=Homo sapiens GN=SACM1L PE=1 SV=2	0	11,465767543369	6	4	12	4	1	587	66,924	6,3514906167984	4	7,12	found	found
P08574	Cytochrome c1, heme protein, mitochondrial OS=Homo sapiens GN=CYC1 PE=1 SV=3	0	11	19	4	13	4	1	325	35,399	10	4	9	found	found
P12883	Myosin-7 OS=Homo sapiens GN=MYH7 PE=1 SV=5	0	350	49	93	428	37	1	1935	222,959	613	93	5,8	found	found
Q15005	Signal peptidase complex subunit 2 OS=Homo sapiens GN=SPCS2 PE=1 SV=3	0	12	25	5	12	5	1	226	24,987	0	5	8,47	found	found
O75083	WD repeat-containing protein 1 OS=Homo sapiens GN=WDR1 PE=1 SV=4	0	15	8	6	18	6	1	606	66,152	31	6	6,65	found	found
P04792	Heat shock protein beta-1 OS=Homo sapiens GN=HSPB1 PE=1 SV=2	0	25	21	7	38	7	1	205	22,768	34	7	6,4	found	found
P52292	Importin subunit alpha-1 OS=Homo sapiens GN=KPNA2 PE=1 SV=1	0	12,735568991062	10	4	17	4	1	529	57,826	13	4	5,4	found	found
P24666	Low molecular weight phosphotyrosine protein phosphatase OS=Homo sapiens GN=ACP1 PE=1 SV=3	0,00358521787093216	2	5	1	17	1	1	158	18,031	3	1	6,74	found	found
Q15118	[Pyruvate dehydrogenase (acetyl-transferring)] kinase isozyme 1, mitochondrial OS=Homo sapiens GN=PDK1 PE=1 SV=1	0	21	22	7	29	7	1	436	49,213	15	7	8,81	found	found
Q99714	3-hydroxyacyl-CoA dehydrogenase type-2 OS=Homo sapiens GN=HSD17B10 PE=1 SV=3	0	29	59	10	30	10	1	261	26,906	36	10	7,78	found	found
P05091	Aldehyde dehydrogenase, mitochondrial OS=Homo sapiens GN=ALDH2 PE=1 SV=2	0	19	17	8	29	7	1	517	56,346	18	8	7,05	found	found
P00505	Aspartate aminotransferase, mitochondrial OS=Homo sapiens GN=GOT2 PE=1 SV=3	0	45	40	14	51	14	1	430	47,487	56	14	9,01	found	found
Q01813	ATP-dependent 6-phosphofructokinase, platelet type OS=Homo sapiens GN=PFKP PE=1 SV=2	0	56	30	18	77	15	1	784	85,542	66	18	7,55	found	found
P53621	Coatomer subunit alpha OS=Homo sapiens GN=COPA PE=1 SV=2	0	35	10	12	34	12	1	1224	138,258	27	12	7,66	found	found
P31930	Cytochrome b-c1 complex subunit 1, mitochondrial OS=Homo sapiens GN=UQCRC1 PE=1 SV=3	0	12	10	4	22	4	1	480	52,612	32	4	6,37	found	found
P54886	Delta-1-pyrroline-5-carboxylate synthase OS=Homo sapiens GN=ALDH18A1 PE=1 SV=2	0	17	7	6	35	6	1	795	87,248	46	6	7,12	found	found
P10515	Dihydrolipoyllysine-residue acetyltransferase component of pyruvate dehydrogenase complex, mitochondrial OS=Homo sapiens GN=DLAT PE=1 SV=3	0	12	8	5	25	5	1	647	68,953	28	5	7,84	found	found
P52701	DNA mismatch repair protein Msh6 OS=Homo sapiens GN=MSH6 PE=1 SV=2	0	19	6	7	27	7	1	1360	152,689	51	7	6,9	found	found
Q9BXW7	Haloacid dehalogenase-like hydrolase domain-containing 5 OS=Homo sapiens GN=HDHD5 PE=1 SV=1	0	23	27	7	24	7	1	423	46,292	19	7	8,13	found	found
Q5SSJ5	Heterochromatin protein 1-binding protein 3 OS=Homo sapiens GN=HP1BP3 PE=1 SV=1	0	12	8	5	22	5	1	553	61,169	17	5	9,67	found	found
P07305	Histone H1.0 OS=Homo sapiens GN=H1F0 PE=1 SV=3	0	6	9	2	17	2	1	194	20,85	26	2	10,84	found	found
P51659	Peroxisomal multifunctional enzyme type 2 OS=Homo sapiens GN=HSD17B4 PE=1 SV=3	0	43	18	11	42	11	1	736	79,636	41	11	8,84	found	found
P61026	Ras-related protein Rab-10 OS=Homo sapiens GN=RAB10 PE=1 SV=1	0	21	31	6	71	3	1	200	22,527	60	6	8,38	found	found
P55084	Trifunctional enzyme subunit beta, mitochondrial OS=Homo sapiens GN=HADHB PE=1 SV=3	0	38	35	13	60	13	1	474	51,262	53	13	9,41	found	found
P62269	40S ribosomal protein S18 OS=Homo sapiens GN=RPS18 PE=1 SV=3	0	19	25	6	30	6	1	152	17,708	41	6	10,99	found	found
P14868	Aspartate--tRNA ligase, cytoplasmic OS=Homo sapiens GN=DARS PE=1 SV=2	0	28	17	9	42	9	1	501	57,1	33	9	6,55	found	found
P26641-2	Isoform 2 of Elongation factor 1-gamma OS=Homo sapiens GN=EEF1G	0	21	20	7	30	7	1	487	56,114	54	7	7,72	found	found
P61619	Protein transport protein Sec61 subunit alpha isoform 1 OS=Homo sapiens GN=SEC61A1 PE=1 SV=2	0	30	19	7	31	7	1	476	52,231	37,816298365593	7	8,06	found	found
P53007	Tricarboxylate transport protein, mitochondrial OS=Homo sapiens GN=SLC25A1 PE=1 SV=2	0	17	25,08038585209	5	26	5	1	311	33,991	41	5	9,89	found	found
P62195	26S protease regulatory subunit 8 OS=Homo sapiens GN=PSMC5 PE=1 SV=1	0	19	18	6	30	5	1	406	45,597	36	6	7,55	found	found
P62244	40S ribosomal protein S15a OS=Homo sapiens GN=RPS15A PE=1 SV=2	0	21	43	7	41	7	1	130	14,83	35	7	10,13	found	found
P62424	60S ribosomal protein L7a OS=Homo sapiens GN=RPL7A PE=1 SV=2	0	23,78549524392	33	9	33	9	1	266	29,977	27	9	10,61	found	found
P06576	ATP synthase subunit beta, mitochondrial OS=Homo sapiens GN=ATP5B PE=1 SV=3	0	42	37	13	57	13	1	529	56,525	59	13	5,4	found	found
P27797	Calreticulin OS=Homo sapiens GN=CALR PE=1 SV=1	0	21	19	6	40	6	1	417	48,112	57	6	4,44	found	found
Q14204	Cytoplasmic dynein 1 heavy chain 1 OS=Homo sapiens GN=DYNC1H1 PE=1 SV=5	0	100	9	33	103	33	1	4646	532,072	125	33	6,4	found	found
P09622	Dihydrolipoyl dehydrogenase, mitochondrial OS=Homo sapiens GN=DLD PE=1 SV=2	0	18,514102411683	16	6	29	6	1	509	54,143	24	6	7,85	found	found
P33993	DNA replication licensing factor MCM7 OS=Homo sapiens GN=MCM7 PE=1 SV=4	0	27	14	9	34	9	1	719	81,257	22	9	6,46	found	found
P04075-2	Isoform 2 of Fructose-bisphosphate aldolase A OS=Homo sapiens GN=ALDOA	0	34	25	10	52	9	1	418	45,232	56	10	8,25	found	found
P35527	Keratin, type I cytoskeletal 9 OS=Homo sapiens GN=KRT9 PE=1 SV=3	0	86	43	22	164	21	1	623	62,027	195	22	5,24	found	found
P61247	40S ribosomal protein S3a OS=Homo sapiens GN=RPS3A PE=1 SV=2	0	34	36	10	59	10	1	264	29,926	29	10	9,73	found	found
P62753	40S ribosomal protein S6 OS=Homo sapiens GN=RPS6 PE=1 SV=1	0	16	21	5	45	5	1	249	28,663	41	5	10,84	found	found
P61254	60S ribosomal protein L26 OS=Homo sapiens GN=RPL26 PE=1 SV=1	0	16	28	6	38	6	1	145	17,248	34	6	10,55	found	found
P46776	60S ribosomal protein L27a OS=Homo sapiens GN=RPL27A PE=1 SV=2	0	15	27	5	40	5	1	148	16,551	53	5	11	found	found
Q02878	60S ribosomal protein L6 OS=Homo sapiens GN=RPL6 PE=1 SV=3	0	24	29	9	38	9	1	288	32,708	29	9	10,58	found	found
P06733	Alpha-enolase OS=Homo sapiens GN=ENO1 PE=1 SV=2	0	55	48	18	94	15	1	434	47,139	131	18	7,39	found	found
O75964	ATP synthase subunit g, mitochondrial OS=Homo sapiens GN=ATP5L PE=1 SV=3	0	9	24	3	31	3	1	103	11,421	33,765563249588	3	9,64	found	found
P39656	Dolichyl-diphosphooligosaccharide--protein glycosyltransferase 48 kDa subunit OS=Homo sapiens GN=DDOST PE=1 SV=4	0	26	30	8	40	8	1	456	50,769	44	8	6,55	found	found
P04844	Dolichyl-diphosphooligosaccharide--protein glycosyltransferase subunit 2 OS=Homo sapiens GN=RPN2 PE=1 SV=3	0	36	31	11	45	11	1	631	69,241	54	11	5,69	found	found
P60842	Eukaryotic initiation factor 4A-I OS=Homo sapiens GN=EIF4A1 PE=1 SV=1	0	53	50	17	105	9	1	406	46,125	94	17	5,48	found	found
Q16658	Fascin OS=Homo sapiens GN=FSCN1 PE=1 SV=3	0	42,700661489979	24	14	98	14	1	493	54,496	99	14	7,24	found	found
P49327	Fatty acid synthase OS=Homo sapiens GN=FASN PE=1 SV=3	0	122	24	41	107	41	1	2511	273,254	88	41	6,44	found	found
P14866	Heterogeneous nuclear ribonucleoprotein L OS=Homo sapiens GN=HNRNPL PE=1 SV=2	0	32	24	10	60	9	1	589	64,092	65	10	8,22	found	found
P22626	Heterogeneous nuclear ribonucleoproteins A2/B1 OS=Homo sapiens GN=HNRNPA2B1 PE=1 SV=2	0	68,204421389448	56	18	99	16	1	353	37,407	132	18	8,95	found	found
P05556	Integrin beta-1 OS=Homo sapiens GN=ITGB1 PE=1 SV=2	0	22	10	8	35	8	1	798	88,357	33	8	5,39	found	found
P45880-1	Isoform 1 of Voltage-dependent anion-selective channel protein 2 OS=Homo sapiens GN=VDAC2	0	22	26,537216828479	7	66	7	1	309	33,351	82,623486995697	7	7,59	found	found
P07355-2	Isoform 2 of Annexin A2 OS=Homo sapiens GN=ANXA2	0	52	57	16	90	16	1	357	40,386	105	16	8,37	found	found
P42704	Leucine-rich PPR motif-containing protein, mitochondrial OS=Homo sapiens GN=LRPPRC PE=1 SV=3	0	58,074746734437	17	21	75	21	1	1394	157,805	67	21	6,13	found	found
P19338	Nucleolin OS=Homo sapiens GN=NCL PE=1 SV=3	0	40	16	15	71	15	1	710	76,568	85,259642124176	15	4,7	found	found
Q15365	Poly(rC)-binding protein 1 OS=Homo sapiens GN=PCBP1 PE=1 SV=2	0	27	35	8	37	6	1	356	37,474	35	8	7,09	found	found
P30101	Protein disulfide-isomerase A3 OS=Homo sapiens GN=PDIA3 PE=1 SV=4	0	42	30	14	57	14	1	505	56,747	40,966943860054	14	6,35	found	found
Q07955	Serine/arginine-rich splicing factor 1 OS=Homo sapiens GN=SRSF1 PE=1 SV=2	0	24,217397666351	27	7	50	7	1	248	27,728	30	7	10,36	found	found
P50990	T-complex protein 1 subunit theta OS=Homo sapiens GN=CCT8 PE=1 SV=4	0	39	24	12	49	12	1	548	59,583	50	12	5,6	found	found
P21796	Voltage-dependent anion-selective channel protein 1 OS=Homo sapiens GN=VDAC1 PE=1 SV=2	0	34	43	10	62	9	1	283	30,754	63	10	8,54	found	found
P13010	X-ray repair cross-complementing protein 5 OS=Homo sapiens GN=XRCC5 PE=1 SV=3	0	53	29	15	59	15	1	732	82,652	111	15	5,81	found	found
O75534-4	Isoform 4 of Cold shock domain-containing protein E1 OS=Homo sapiens GN=CSDE1	0	9	3	3	14	3	1	844	93,683	36	3	6,52	found	found
P35556	Fibrillin-2 OS=Homo sapiens GN=FBN2 PE=1 SV=3	0	46	4	13	44	12	1	2912	314,558	67	13	4,86	found	found
P38117-2	Isoform 2 of Electron transfer flavoprotein subunit beta OS=Homo sapiens GN=ETFB	0	17	18	6	28	6	1	346	37,411	26	6	7,17	found	found
Q14315-2	Isoform 2 of Filamin-C OS=Homo sapiens GN=FLNC	0	123	19	39	162	33	1	2692	287,102	200	39	5,97	found	found
Q00325-2	Isoform B of Phosphate carrier protein, mitochondrial OS=Homo sapiens GN=SLC25A3	0	47	57	16	125	1	1	361	39,933	129	16	9,36	found	found
Q9P2R7	Succinate--CoA ligase [ADP-forming] subunit beta, mitochondrial OS=Homo sapiens GN=SUCLA2 PE=1 SV=3	0	22,628801873688	16	8	30	8	1	463	50,285	16	8	7,42	found	found
Q02218	2-oxoglutarate dehydrogenase, mitochondrial OS=Homo sapiens GN=OGDH PE=1 SV=3	0	32	14	12	35	12	1	1023	115,861	33	12	6,86	found	found
Q99798	Aconitate hydratase, mitochondrial OS=Homo sapiens GN=ACO2 PE=1 SV=2	0	37,678749115509	22	12	51	12	1	780	85,372	38	12	7,61	found	found
Q92616	eIF-2-alpha kinase activator GCN1 OS=Homo sapiens GN=GCN1 PE=1 SV=6	0	51	8	17	43	17	1	2671	292,572	52	17	7,47	found	found
P50213	Isocitrate dehydrogenase [NAD] subunit alpha, mitochondrial OS=Homo sapiens GN=IDH3A PE=1 SV=1	0	31	34	11	38	11	1	366	39,566	49,403303027153	11	6,92	found	found
P48735	Isocitrate dehydrogenase [NADP], mitochondrial OS=Homo sapiens GN=IDH2 PE=1 SV=2	0	63	48	20	110	19	1	452	50,877	124	20	8,69	found	found
Q13423	NAD(P) transhydrogenase, mitochondrial OS=Homo sapiens GN=NNT PE=1 SV=3	0	49,85651301802	18	18	62	18	1	1086	113,823	30	18	8,09	found	found
P40939	Trifunctional enzyme subunit alpha, mitochondrial OS=Homo sapiens GN=HADHA PE=1 SV=2	0	71	42	23	87	23	1	763	82,947	49	23	9,04	found	found
P62851	40S ribosomal protein S25 OS=Homo sapiens GN=RPS25 PE=1 SV=1	0	14	29,6	5	29	5	1	125	13,734	42	5	10,11	found	found
P46782	40S ribosomal protein S5 OS=Homo sapiens GN=RPS5 PE=1 SV=4	0	31,349845154292	42,156862745098	8	60	8	1	204	22,862	91	8	9,72	found	found
P12235	ADP/ATP translocase 1 OS=Homo sapiens GN=SLC25A4 PE=1 SV=4	0	56,188174109321	67	17	131	6	1	298	33,043	178	17	9,76	found	found
P24539	ATP synthase F(0) complex subunit B1, mitochondrial OS=Homo sapiens GN=ATP5F1 PE=1 SV=2	0	22	26,5625	6	51	6	1	256	28,89	68	6	9,36	found	found
O00425	Insulin-like growth factor 2 mRNA-binding protein 3 OS=Homo sapiens GN=IGF2BP3 PE=1 SV=2	0	28	20	10	42	8	1	579	63,666	53	10	8,87	found	found
Q5QNW6-2	Isoform 2 of Histone H2B type 2-F OS=Homo sapiens GN=HIST2H2BF	0	27	38	6	83	2	1	134	14,832	112	6	10,35	found	found
P18669	Phosphoglycerate mutase 1 OS=Homo sapiens GN=PGAM1 PE=1 SV=2	0	25	35	6	27	6	1	254	28,786	49	6	7,18	found	found
P62280	40S ribosomal protein S11 OS=Homo sapiens GN=RPS11 PE=1 SV=3	0	23	46	8	44	8	1	158	18,419	17	8	10,3	found	found
P39023	60S ribosomal protein L3 OS=Homo sapiens GN=RPL3 PE=1 SV=2	0	42	37	15	54	15	1	403	46,08	42	15	10,18	found	found
P05141	ADP/ATP translocase 2 OS=Homo sapiens GN=SLC25A5 PE=1 SV=7	0	51	52	15	136	5	1	298	32,831	216	15	9,69	found	found
Q9Y4W6	AFG3-like protein 2 OS=Homo sapiens GN=AFG3L2 PE=1 SV=2	0	40	16,060225846926	12	52	12	1	797	88,528	62	12	8,66	found	found
P48047	ATP synthase subunit O, mitochondrial OS=Homo sapiens GN=ATP5O PE=1 SV=1	0	32	57	9	57	9	1	213	23,263	56	9	9,96	found	found
P13073	Cytochrome c oxidase subunit 4 isoform 1, mitochondrial OS=Homo sapiens GN=COX4I1 PE=1 SV=1	0	13	30	5	30	5	1	169	19,564	19	5	9,51	found	found
P35232	Prohibitin OS=Homo sapiens GN=PHB PE=1 SV=1	0	31	44	10	63	10	1	272	29,786	59	10	5,76	found	found
P50991	T-complex protein 1 subunit delta OS=Homo sapiens GN=CCT4 PE=1 SV=4	0	34	29	12	53	12	1	539	57,888	39	12	7,83	found	found
P62249	40S ribosomal protein S16 OS=Homo sapiens GN=RPS16 PE=1 SV=2	0	18	34	6	59	6	1	146	16,435	40	6	10,21	found	found
P15880	40S ribosomal protein S2 OS=Homo sapiens GN=RPS2 PE=1 SV=2	0	23	26	8	47	8	1	293	31,305	27	8	10,24	found	found
P23396	40S ribosomal protein S3 OS=Homo sapiens GN=RPS3 PE=1 SV=2	0	43	59	13	119	13	1	243	26,671	151	13	9,66	found	found
P46781	40S ribosomal protein S9 OS=Homo sapiens GN=RPS9 PE=1 SV=3	0	18	32	7	41	7	1	194	22,578	29	7	10,65	found	found
P10809	60 kDa heat shock protein, mitochondrial OS=Homo sapiens GN=HSPD1 PE=1 SV=2	0	90	54	26	143	26	1	573	61,016	164	26	5,87	found	found
P05388	60S acidic ribosomal protein P0 OS=Homo sapiens GN=RPLP0 PE=1 SV=1	0	17	15	5	38	5	1	317	34,252	19	5	5,97	found	found
P27635	60S ribosomal protein L10 OS=Homo sapiens GN=RPL10 PE=1 SV=4	0	32	43	9	57	9	1	214	24,588	65	9	10,08	found	found
P50914	60S ribosomal protein L14 OS=Homo sapiens GN=RPL14 PE=1 SV=4	0	11	20	4	39	4	1	215	23,417	37	4	10,93	found	found
P61313	60S ribosomal protein L15 OS=Homo sapiens GN=RPL15 PE=1 SV=2	0	24	25	6	57	6	1	204	24,131	49	6	11,62	found	found
Q07020	60S ribosomal protein L18 OS=Homo sapiens GN=RPL18 PE=1 SV=2	0	22	42	7	72	7	1	188	21,621	66	7	11,72	found	found
P62829	60S ribosomal protein L23 OS=Homo sapiens GN=RPL23 PE=1 SV=1	0	18	43	5	53	5	1	140	14,856	61	5	10,51	found	found
Q9Y3U8	60S ribosomal protein L36 OS=Homo sapiens GN=RPL36 PE=1 SV=3	0,000656167979002625	3	9	1	19	1	1	105	12,246	27	1	11,59	found	found
P18124	60S ribosomal protein L7 OS=Homo sapiens GN=RPL7 PE=1 SV=1	0	19	33	7	35	7	1	248	29,207	25	7	10,65	found	found
P11021	78 kDa glucose-regulated protein OS=Homo sapiens GN=HSPA5 PE=1 SV=2	0	73	35	22	122	20	1	654	72,288	107	22	5,16	found	found
P68032	Actin, alpha cardiac muscle 1 OS=Homo sapiens GN=ACTC1 PE=1 SV=1	0	127	84	26	531	12	1	377	41,992	948	26	5,39	found	found
P60709	Actin, cytoplasmic 1 OS=Homo sapiens GN=ACTB PE=1 SV=1	0	150,90067913659	81	28	600	8	1	375	41,71	1143	28	5,48	found	found
P08758	Annexin A5 OS=Homo sapiens GN=ANXA5 PE=1 SV=2	0	42	55	13	111	13	1	320	35,914	120	13	5,05	found	found
P08133	Annexin A6 OS=Homo sapiens GN=ANXA6 PE=1 SV=3	0	76	42	23	111	23	1	673	75,826	86	23	5,6	found	found
P25705	ATP synthase subunit alpha, mitochondrial OS=Homo sapiens GN=ATP5A1 PE=1 SV=1	0	73	45	20	215	20	1	553	59,714	313	20	9,13	found	found
P36542	ATP synthase subunit gamma, mitochondrial OS=Homo sapiens GN=ATP5C1 PE=1 SV=1	0	25	33	8	40	8	1	298	32,975	19	8	9,22	found	found
Q08211	ATP-dependent RNA helicase A OS=Homo sapiens GN=DHX9 PE=1 SV=4	0	63	19	21	84	21	1	1270	140,869	87	21	6,84	found	found
O00571	ATP-dependent RNA helicase DDX3X OS=Homo sapiens GN=DDX3X PE=1 SV=3	0	25	15	8	55	7	1	662	73,198	72	8	7,18	found	found
O75390	Citrate synthase, mitochondrial OS=Homo sapiens GN=CS PE=1 SV=2	0	45	42	14	78	14	1	466	51,68	118	14	8,32	found	found
Q00610	Clathrin heavy chain 1 OS=Homo sapiens GN=CLTC PE=1 SV=5	0	95,67453708749	23	30	112	30	1	1675	191,493	143	30	5,69	found	found
Q07065	Cytoskeleton-associated protein 4 OS=Homo sapiens GN=CKAP4 PE=1 SV=2	0	35	24	12	46	12	1	602	65,983	54	12	5,92	found	found
P78527	DNA-dependent protein kinase catalytic subunit OS=Homo sapiens GN=PRKDC PE=1 SV=3	0	182	19	62	197	62	1	4128	468,788	186	62	7,12	found	found
P04843	Dolichyl-diphosphooligosaccharide--protein glycosyltransferase subunit 1 OS=Homo sapiens GN=RPN1 PE=1 SV=1	0	71	44	21	123	21	1	607	68,527	104	21	6,38	found	found
P68104	Elongation factor 1-alpha 1 OS=Homo sapiens GN=EEF1A1 PE=1 SV=1	0	85	49	19	279	10	1	462	50,109	445	19	9,01	found	found
P13639	Elongation factor 2 OS=Homo sapiens GN=EEF2 PE=1 SV=4	0	117	50	35	195	34	1	858	95,277	191	35	6,83	found	found
P49411	Elongation factor Tu, mitochondrial OS=Homo sapiens GN=TUFM PE=1 SV=2	0	69	53	18	92	18	1	452	49,51	175	18	7,61	found	found
P14625	Endoplasmin OS=Homo sapiens GN=HSP90B1 PE=1 SV=1	0	79	28	24	164	22	1	803	92,411	156,67705976963	24	4,84	found	found
P38919	Eukaryotic initiation factor 4A-III OS=Homo sapiens GN=EIF4A3 PE=1 SV=4	0	31	27	11	56	9	1	411	46,841	36	11	6,73	found	found
P04406	Glyceraldehyde-3-phosphate dehydrogenase OS=Homo sapiens GN=GAPDH PE=1 SV=3	0	55	66	15	141	15	1	335	36,03	182	15	8,46	found	found
P62826	GTP-binding nuclear protein Ran OS=Homo sapiens GN=RAN PE=1 SV=3	0	16,923746481823	27	5	52	5	1	216	24,408	31	5	7,49	found	found
P11142	Heat shock cognate 71 kDa protein OS=Homo sapiens GN=HSPA8 PE=1 SV=1	0	79,104263468012	36,687306501548	22	128	17	1	646	70,854	159	22	5,52	found	found
Q12931	Heat shock protein 75 kDa, mitochondrial OS=Homo sapiens GN=TRAP1 PE=1 SV=3	0	34	19	10	59	9	1	704	80,06	81	10	8,21	found	found
P08238	Heat shock protein HSP 90-beta OS=Homo sapiens GN=HSP90AB1 PE=1 SV=4	0	114	48	32	280	21	1	724	83,212	337	32	5,03	found	found
P09651	Heterogeneous nuclear ribonucleoprotein A1 OS=Homo sapiens GN=HNRNPA1 PE=1 SV=5	0	65	43,010752688172	14	126	12	1	372	38,723	174	14	9,13	found	found
P51991	Heterogeneous nuclear ribonucleoprotein A3 OS=Homo sapiens GN=HNRNPA3 PE=1 SV=2	0	53	26	12	81	11	1	378	39,571	145	12	9,01	found	found
P52272	Heterogeneous nuclear ribonucleoprotein M OS=Homo sapiens GN=HNRNPM PE=1 SV=3	0	66	34	22	95	22	1	730	77,464	122	22	8,7	found	found
Q00839	Heterogeneous nuclear ribonucleoprotein U OS=Homo sapiens GN=HNRNPU PE=1 SV=6	0	76,653431771073	33	23	135	23	1	825	90,528	129	23	6	found	found
P07910	Heterogeneous nuclear ribonucleoproteins C1/C2 OS=Homo sapiens GN=HNRNPC PE=1 SV=4	0	25	24	8	69	8	1	306	33,65	95	8	5,08	found	found
P19367	Hexokinase-1 OS=Homo sapiens GN=HK1 PE=1 SV=3	0	76	32,824427480916	24	111	22	1	917	102,42	91	24	6,8	found	found
P62805	Histone H4 OS=Homo sapiens GN=HIST1H4A PE=1 SV=2	0	34	53	8	186	8	1	103	11,36	357	8	11,36	found	found
Q9NZI8	Insulin-like growth factor 2 mRNA-binding protein 1 OS=Homo sapiens GN=IGF2BP1 PE=1 SV=2	0	40	25	12	77	11	1	577	63,441	99,182648062706	12	9,2	found	found
O75874	Isocitrate dehydrogenase [NADP] cytoplasmic OS=Homo sapiens GN=IDH1 PE=1 SV=2	0	32	28	11	63	10	1	414	46,63	76	11	7,01	found	found
P27824-2	Isoform 2 of Calnexin OS=Homo sapiens GN=CANX	0	43	21	12	60	12	1	627	71,458	76	12	4,7	found	found
P61978-2	Isoform 2 of Heterogeneous nuclear ribonucleoprotein K OS=Homo sapiens GN=HNRNPK	0	31,846372258854	27	10	66	10	1	464	50,996	60	10	5,33	found	found
P08559-4	Isoform 4 of Pyruvate dehydrogenase E1 component subunit alpha, somatic form, mitochondrial OS=Homo sapiens GN=PDHA1	0	52	25	12	133	12	1	428	47,549	141	12	8,54	found	found
P13645	Keratin, type I cytoskeletal 10 OS=Homo sapiens GN=KRT10 PE=1 SV=6	0	115	55	30	253	24	1	584	58,792	318	30	5,21	found	found
P04264	Keratin, type II cytoskeletal 1 OS=Homo sapiens GN=KRT1 PE=1 SV=6	0	134	47	32	363	26	1	644	65,999	602	32	8,12	found	found
P40926	Malate dehydrogenase, mitochondrial OS=Homo sapiens GN=MDH2 PE=1 SV=3	0	38	47	12	140	12	1	338	35,481	143	12	8,68	found	found
P06748	Nucleophosmin OS=Homo sapiens GN=NPM1 PE=1 SV=2	0	41	39	9	74	9	1	294	32,555	74	9	4,78	found	found
P00558	Phosphoglycerate kinase 1 OS=Homo sapiens GN=PGK1 PE=1 SV=3	0	40	39,568345323741	13	55	13	1	417	44,586	60	13	8,1	found	found
P07737	Profilin-1 OS=Homo sapiens GN=PFN1 PE=1 SV=2	0	41	72	11	67	11	1	140	15,045	91,899578332901	11	8,27	found	found
Q99623	Prohibitin-2 OS=Homo sapiens GN=PHB2 PE=1 SV=2	0	40	45,819397993311	12	84	12	1	299	33,276	70	12	9,83	found	found
P63244	Receptor of activated protein C kinase 1 OS=Homo sapiens GN=RACK1 PE=1 SV=3	0	46	43	13	80	13	1	317	35,055	75	13	7,69	found	found
P16615	Sarcoplasmic/endoplasmic reticulum calcium ATPase 2 OS=Homo sapiens GN=ATP2A2 PE=1 SV=1	0	83	29	28	123	28	1	1042	114,683	123	28	5,34	found	found
P34897	Serine hydroxymethyltransferase, mitochondrial OS=Homo sapiens GN=SHMT2 PE=1 SV=3	0	35	22	12	83	12	1	504	55,958	51	12	8,53	found	found
P05023	Sodium/potassium-transporting ATPase subunit alpha-1 OS=Homo sapiens GN=ATP1A1 PE=1 SV=1	0	73	28	25	128	25	1	1023	112,824	92	25	5,49	found	found
P38646	Stress-70 protein, mitochondrial OS=Homo sapiens GN=HSPA9 PE=1 SV=2	0	46	24	16	100	16	1	679	73,635	109	16	6,16	found	found
P49368	T-complex protein 1 subunit gamma OS=Homo sapiens GN=CCT3 PE=1 SV=4	0	50,085981499913	41	17	63	17	1	545	60,495	59	17	6,49	found	found
P60174	Triosephosphate isomerase OS=Homo sapiens GN=TPI1 PE=1 SV=3	0	36	54	11	43	11	1	286	30,772	34,680862903595	11	5,92	found	found
Q71U36	Tubulin alpha-1A chain OS=Homo sapiens GN=TUBA1A PE=1 SV=1	0	108,70144998017	75,609756097561	26	320	2	1	451	50,104	460	26	5,06	found	found
P07437	Tubulin beta chain OS=Homo sapiens GN=TUBB PE=1 SV=2	0	99	72,972972972973	23	647	4	1	444	49,639	852	23	4,89	found	found
sp	Ubiquitin-40S ribosomal protein S27a OS=Homo sapiens GN=RPS27A PE=1 SV=2	0	18	30	5	75	5	1	156	17,953	68	5	9,64	found	found
P09543	2',3'-cyclic-nucleotide 3'-phosphodiesterase OS=Homo sapiens GN=CNP PE=1 SV=2	0	8	8	4	7	4	1	421	47,549	9,0608651638031	4	9,07	not found	found
P39019	40S ribosomal protein S19 OS=Homo sapiens GN=RPS19 PE=1 SV=2	0	10	22	3	8	3	1	145	16,051	13,331772685051	3	10,32	not found	found
P61353	60S ribosomal protein L27 OS=Homo sapiens GN=RPL27 PE=1 SV=2	0	8	20	3	7	3	1	136	15,788	6	3	10,56	not found	found
P61160	Actin-related protein 2 OS=Homo sapiens GN=ACTR2 PE=1 SV=1	0	4	6	2	4	2	1	394	44,732	0	2	6,74	not found	found
P21397	Amine oxidase [flavin-containing] A OS=Homo sapiens GN=MAOA PE=1 SV=1	0	4	2	1	3	1	1	527	59,644	5	1	7,85	not found	found
P15848	Arylsulfatase B OS=Homo sapiens GN=ARSB PE=1 SV=1	0,000656167979002625	3,3873220816835	1	1	3	1	1	533	59,649	6,3865954875946	1	8,21	not found	found
O75531	Barrier-to-autointegration factor OS=Homo sapiens GN=BANF1 PE=1 SV=1	0	5	34	2	4	2	1	89	10,052	4	2	6,09	not found	found
Q13895	Bystin OS=Homo sapiens GN=BYSL PE=1 SV=3	0,000656167979002625	3	2,2883295194508	1	3	1	1	437	49,57	2	1	8,12	not found	found
Q9HB71	Calcyclin-binding protein OS=Homo sapiens GN=CACYBP PE=1 SV=2	0	5	8,7719298245614	2	4	2	1	228	26,194	3	2	8,25	not found	found
Q8WY07	Cationic amino acid transporter 3 OS=Homo sapiens GN=SLC7A3 PE=1 SV=1	0,00589970501474926	2	1	1	3	1	1	619	67,125	1	1	6,19	not found	found
Q9UQN3	Charged multivesicular body protein 2b OS=Homo sapiens GN=CHMP2B PE=1 SV=1	0,00358521787093216	2	4	1	3	1	1	213	23,891	1	1	8,76	not found	found
P45973	Chromobox protein homolog 5 OS=Homo sapiens GN=CBX5 PE=1 SV=1	0,000656167979002625	3	6	1	3	1	1	191	22,211	3,4135594367981	1	5,86	not found	found
P56747	Claudin-6 OS=Homo sapiens GN=CLDN6 PE=1 SV=2	0	6	13	3	7	3	1	220	23,276	0	3	8	not found	found
P00740	Coagulation factor IX OS=Homo sapiens GN=F9 PE=1 SV=2	0,00348432055749129	3	2	1	3	1	1	461	51,745	1	1	5,47	not found	found
P00742	Coagulation factor X OS=Homo sapiens GN=F10 PE=1 SV=2	0,00407387289516567	2	1	1	3	1	1	488	54,697	0	1	5,94	not found	found
O94874	E3 UFM1-protein ligase 1 OS=Homo sapiens GN=UFL1 PE=1 SV=2	0,00348432055749129	3	1	1	3	1	1	794	89,54	7	1	6,79	not found	found
O43854	EGF-like repeat and discoidin I-like domain-containing protein 3 OS=Homo sapiens GN=EDIL3 PE=1 SV=1	0,00358521787093216	2	2	1	3	1	1	480	53,73	7,9966151714325	1	7,28	not found	found
P24534	Elongation factor 1-beta OS=Homo sapiens GN=EEF1B2 PE=1 SV=3	0	5	10	2	3	2	1	225	24,748	3	2	4,67	not found	found
Q15056	Eukaryotic translation initiation factor 4H OS=Homo sapiens GN=EIF4H PE=1 SV=5	0	3	5	2	6	2	1	248	27,368	5	2	7,23	not found	found
P62873	Guanine nucleotide-binding protein G(I)/G(S)/G(T) subunit beta-1 OS=Homo sapiens GN=GNB1 PE=1 SV=3	0	9,8584196463544	11	4	16	1	1	340	37,353	8	4	6	not found	found
P08754	Guanine nucleotide-binding protein G(k) subunit alpha OS=Homo sapiens GN=GNAI3 PE=1 SV=3	0	10	12	4	15	2	1	354	40,506	4	4	5,69	not found	found
P50148	Guanine nucleotide-binding protein G(q) subunit alpha OS=Homo sapiens GN=GNAQ PE=1 SV=4	0	6	6	2	4	1	1	359	42,115	8	2	5,68	not found	found
O60832	H/ACA ribonucleoprotein complex subunit 4 OS=Homo sapiens GN=DKC1 PE=1 SV=3	0,000656167979002625	3	1	1	3	1	1	514	57,638	6	1	9,42	not found	found
Q15651	High mobility group nucleosome-binding domain-containing protein 3 OS=Homo sapiens GN=HMGN3 PE=1 SV=2	0	7	15	1	3	1	1	99	10,66	2	1	9,66	not found	found
P37235	Hippocalcin-like protein 1 OS=Homo sapiens GN=HPCAL1 PE=1 SV=3	0	7	5	1	4	1	1	193	22,299	11	1	5,35	not found	found
Q6PFW1	Inositol hexakisphosphate and diphosphoinositol-pentakisphosphate kinase 1 OS=Homo sapiens GN=PPIP5K1 PE=1 SV=1	0,00651041666666667	2	0,558269364968597	1	3	1	1	1433	159,42	5,7340304851532	1	5,4	not found	found
Q9NPH2	Inositol-3-phosphate synthase 1 OS=Homo sapiens GN=ISYNA1 PE=1 SV=1	0	7	9	3	6	3	1	558	61,029	7	3	5,76	not found	found
O00231-2	Isoform 2 of 26S proteasome non-ATPase regulatory subunit 11 OS=Homo sapiens GN=PSMD11	0,000656167979002625	3	2	1	3	1	1	423	47,505	1	1	6,48	not found	found
Q16630-2	Isoform 2 of Cleavage and polyadenylation specificity factor subunit 6 OS=Homo sapiens GN=CPSF6	0	6	3	2	5	2	1	588	63,432	1	2	7,71	not found	found
Q96AE4-2	Isoform 2 of Far upstream element-binding protein 1 OS=Homo sapiens GN=FUBP1	0	8	5	3	7	3	1	653	68,562	3	3	7,31	not found	found
Q99729-2	Isoform 2 of Heterogeneous nuclear ribonucleoprotein A/B OS=Homo sapiens GN=HNRNPAB	0	11	13	4	14	3	1	332	35,945	10	4	6,95	not found	found
Q8TEX9-2	Isoform 2 of Importin-4 OS=Homo sapiens GN=IPO4	0	11	5	3	8	3	1	1083	118,826	14	3	4,94	not found	found
Q92633-2	Isoform 2 of Lysophosphatidic acid receptor 1 OS=Homo sapiens GN=LPAR1	0,000656167979002625	3	3	1	3	1	1	365	41,318	2	1	8,28	not found	found
Q8TCT9-2	Isoform 2 of Minor histocompatibility antigen H13 OS=Homo sapiens GN=HM13	0,00358521787093216	2	2,8169014084507	1	3	1	1	426	46,795	0	1	7,23	not found	found
P61289-2	Isoform 2 of Proteasome activator complex subunit 3 OS=Homo sapiens GN=PSME3	0,000656167979002625	3	4	1	3	1	1	267	30,867	2	1	6,11	not found	found
Q9NP72-2	Isoform 2 of Ras-related protein Rab-18 OS=Homo sapiens GN=RAB18	0	8	13	3	5	3	1	235	26,393	6	3	5,73	not found	found
P31948-2	Isoform 2 of Stress-induced-phosphoprotein 1 OS=Homo sapiens GN=STIP1	0	11	8	5	12	5	1	590	68,037	4,6036970615387	5	7,74	not found	found
P49589-3	Isoform 3 of Cysteine--tRNA ligase, cytoplasmic OS=Homo sapiens GN=CARS	0,00358521787093216	2	1	1	3	1	1	831	94,578	3	1	6,83	not found	found
Q9C0H2-4	Isoform 4 of Protein tweety homolog 3 OS=Homo sapiens GN=TTYH3	0	8	7	3	5	3	1	526	57,945	12	3	5,31	not found	found
Q14244-7	Isoform 7 of Ensconsin OS=Homo sapiens GN=MAP7	0,00358521787093216	2	1	1	3	1	1	771	86,9	1	1	9,77	not found	found
Q12906-7	Isoform 7 of Interleukin enhancer-binding factor 3 OS=Homo sapiens GN=ILF3	0	18	10	8	14	8	1	898	95,748	7	8	8,81	not found	found
Q14978-2	Isoform Beta of Nucleolar and coiled-body phosphoprotein 1 OS=Homo sapiens GN=NOLC1	0	10	6	4	8	4	1	709	74,702	11	4	9,47	not found	found
P17096-3	Isoform HMG-R of High mobility group protein HMG-I/HMG-Y OS=Homo sapiens GN=HMGA1	0	11	13	3	9	2	1	179	19,682	16	3	11,75	not found	found
P08779	Keratin, type I cytoskeletal 16 OS=Homo sapiens GN=KRT16 PE=1 SV=4	0	39	25,369978858351	12	79	3	1	473	51,236	77	12	5,05	not found	found
Q14165	Malectin OS=Homo sapiens GN=MLEC PE=1 SV=1	0	6	8,9041095890411	2	6	2	1	292	32,214	0	2	5,41	not found	found
P27816	Microtubule-associated protein 4 OS=Homo sapiens GN=MAP4 PE=1 SV=3	0	13	6	5	6	5	1	1152	120,93	2	5	5,43	not found	found
O43676	NADH dehydrogenase [ubiquinone] 1 beta subcomplex subunit 3 OS=Homo sapiens GN=NDUFB3 PE=1 SV=3	0,00358521787093216	2	11	1	3	1	1	98	11,395	1	1	9,2	not found	found
Q9UHQ9	NADH-cytochrome b5 reductase 1 OS=Homo sapiens GN=CYB5R1 PE=1 SV=1	0,00358521787093216	2	2	1	3	1	1	305	34,073	1	1	9,38	not found	found
E9PAV3	Nascent polypeptide-associated complex subunit alpha, muscle-specific form OS=Homo sapiens GN=NACA PE=1 SV=1	0	9	1	3	6	3	1	2078	205,295	3	3	9,58	not found	found
Q9BW27	Nuclear pore complex protein Nup85 OS=Homo sapiens GN=NUP85 PE=1 SV=1	0	4	3,8109756097561	2	5	2	1	656	74,971	7	2	5,55	not found	found
Q96RS6	NudC domain-containing protein 1 OS=Homo sapiens GN=NUDCD1 PE=1 SV=2	0,000656167979002625	3	1	1	3	1	1	583	66,713	7	1	5,11	not found	found
P30086	Phosphatidylethanolamine-binding protein 1 OS=Homo sapiens GN=PEBP1 PE=1 SV=3	0	7	18	2	4	2	1	187	21,044	3	2	7,53	not found	found
Q8NC51	Plasminogen activator inhibitor 1 RNA-binding protein OS=Homo sapiens GN=SERBP1 PE=1 SV=2	0	9	6	2	8	2	1	408	44,938	18,029363155365	2	8,65	not found	found
P00747	Plasminogen OS=Homo sapiens GN=PLG PE=1 SV=2	0,000656167979002625	3	0,987654320987654	1	5	1	1	810	90,51	10	1	7,24	not found	found
P13797	Plastin-3 OS=Homo sapiens GN=PLS3 PE=1 SV=4	0,00348432055749129	3	1	1	3	1	1	630	70,766	4	1	5,6	not found	found
P60900	Proteasome subunit alpha type-6 OS=Homo sapiens GN=PSMA6 PE=1 SV=1	0	7	9	2	5	2	1	246	27,382	2,1419575214386	2	6,76	not found	found
Q5VYK3	Proteasome-associated protein ECM29 homolog OS=Homo sapiens GN=ECM29 PE=1 SV=2	0	7	1	2	4	2	1	1845	204,16	7	2	7,12	not found	found
O00622	Protein CYR61 OS=Homo sapiens GN=CYR61 PE=1 SV=1	0	6	4	2	3	2	1	381	41,998	6	2	8,21	not found	found
Q99497	Protein DJ-1 OS=Homo sapiens GN=PARK7 PE=1 SV=2	0,000656167979002625	3	7	1	3	1	1	189	19,878	2	1	6,79	not found	found
P43487	Ran-specific GTPase-activating protein OS=Homo sapiens GN=RANBP1 PE=1 SV=1	0,00651041666666667	2	5,4726368159204	1	3	1	1	201	23,296	0	1	5,29	not found	found
Q13283	Ras GTPase-activating protein-binding protein 1 OS=Homo sapiens GN=G3BP1 PE=1 SV=1	0,00715197956577267	2	2	1	3	1	1	466	52,132	1	1	5,52	not found	found
P10301	Ras-related protein R-Ras OS=Homo sapiens GN=RRAS PE=1 SV=1	0	11	19	3	9	1	1	218	23,466	12	3	6,93	not found	found
Q6PD62	RNA polymerase-associated protein CTR9 homolog OS=Homo sapiens GN=CTR9 PE=1 SV=1	0	5,3417832449304	2	2	4	2	1	1173	133,42	3	2	6,77	not found	found
P82979	SAP domain-containing ribonucleoprotein OS=Homo sapiens GN=SARNP PE=1 SV=3	0	5,9450344444824	9	2	4	2	1	210	23,656	1,9664181470871	2	6,42	not found	found
P62314	Small nuclear ribonucleoprotein Sm D1 OS=Homo sapiens GN=SNRPD1 PE=1 SV=1	0	5	27	2	3	2	1	119	13,273	0	2	11,56	not found	found
Q16563	Synaptophysin-like protein 1 OS=Homo sapiens GN=SYPL1 PE=1 SV=1	0,000656167979002625	3	4	1	3	1	1	259	28,547	3	1	8,43	not found	found
O00161	Synaptosomal-associated protein 23 OS=Homo sapiens GN=SNAP23 PE=1 SV=1	0	3	6	1	3	1	1	211	23,34	7	1	5,01	not found	found
P04216	Thy-1 membrane glycoprotein OS=Homo sapiens GN=THY1 PE=1 SV=2	0	6	18	2	6	2	1	161	17,923	6	2	8,73	not found	found
Q13885	Tubulin beta-2A chain OS=Homo sapiens GN=TUBB2A PE=1 SV=1	0	92	64	22	575	1	1	445	49,875	707	22	4,89	not found	found
Q9BVA1	Tubulin beta-2B chain OS=Homo sapiens GN=TUBB2B PE=1 SV=1	0	93	64	22	575	1	1	445	49,921	707	22	4,89	not found	found
Q96IX5	Up-regulated during skeletal muscle growth protein 5 OS=Homo sapiens GN=USMG5 PE=1 SV=1	0,00348432055749129	3	17	1	3	1	1	58	6,453	0	1	9,76	not found	found
Q9BQB6	Vitamin K epoxide reductase complex subunit 1 OS=Homo sapiens GN=VKORC1 PE=1 SV=1	0,000656167979002625	3	7	1	3	1	1	163	18,223	0	1	9,36	not found	found
Q6PML9	Zinc transporter 9 OS=Homo sapiens GN=SLC30A9 PE=1 SV=1	0,00358521787093216	2	1	1	3	1	1	568	63,475	5	1	8,32	not found	found
P62861	40S ribosomal protein S30 OS=Homo sapiens GN=FAU PE=1 SV=1	0,0149903288201161	1	16	1	4	1	1	59	6,644	0	1	12,15	not found	found
O15498	Synaptobrevin homolog YKT6 OS=Homo sapiens GN=YKT6 PE=1 SV=1	0,0107392607392607	2	4	1	3	1	1	198	22,403	2	1	6,92	not found	found
O60637	Tetraspanin-3 OS=Homo sapiens GN=TSPAN3 PE=2 SV=1	0,0390134529147982	1,7307206102281	2	1	3	1	1	253	27,999	1	1	5,81	not found	found
Q15125	3-beta-hydroxysteroid-Delta(8),Delta(7)-isomerase OS=Homo sapiens GN=EBP PE=1 SV=3	0,00358521787093216	2	5	1	4	1	1	230	26,336	2	1	7,9	not found	found
Q01518	Adenylyl cyclase-associated protein 1 OS=Homo sapiens GN=CAP1 PE=1 SV=5	0	16,708958168584	13	6	10	5	1	475	51,869	13	6	8,06	not found	found
P0DP23	Calmodulin-1 OS=Homo sapiens GN=CALM1 PE=1 SV=1	0	6	17	2	5	2	1	149	16,827	6	2	4,22	not found	found
P35606	Coatomer subunit beta' OS=Homo sapiens GN=COPB2 PE=1 SV=2	0	5,6090384123331	2	2	4	2	1	906	102,422	2	2	5,27	not found	found
O00154	Cytosolic acyl coenzyme A thioester hydrolase OS=Homo sapiens GN=ACOT7 PE=1 SV=3	0	4	6	2	4	2	1	380	41,769	0	2	8,54	not found	found
Q8WXG9	G-protein coupled receptor 98 OS=Homo sapiens GN=GPR98 PE=1 SV=2	0,00358521787093216	2	0,206152870282271	1	4	1	1	6306	692,637	0	1	4,64	not found	found
P52926	High mobility group protein HMGI-C OS=Homo sapiens GN=HMGA2 PE=1 SV=1	0,00348432055749129	3	11	1	4	1	1	109	11,825	0	1	10,62	not found	found
P50502	Hsc70-interacting protein OS=Homo sapiens GN=ST13 PE=1 SV=2	0	6	9	3	6	3	1	369	41,305	1	3	5,27	not found	found
Q12905	Interleukin enhancer-binding factor 2 OS=Homo sapiens GN=ILF2 PE=1 SV=2	0	5,7532032253273	8	3	5	3	1	390	43,035	0	3	5,26	not found	found
Q14847-2	Isoform 2 of LIM and SH3 domain protein 1 OS=Homo sapiens GN=LASP1	0	7	9	3	5	3	1	323	35,991	3	3	8,62	not found	found
O15173-2	Isoform 2 of Membrane-associated progesterone receptor component 2 OS=Homo sapiens GN=PGRMC2	0	5	8	2	5	2	1	247	26,154	1	2	5,31	not found	found
Q13308-6	Isoform 6 of Inactive tyrosine-protein kinase 7 OS=Homo sapiens GN=PTK7	0	8	3,8961038961039	3	6	3	1	1078	119,122	6	3	6,96	not found	found
O14745	Na(+)/H(+) exchange regulatory cofactor NHE-RF1 OS=Homo sapiens GN=SLC9A3R1 PE=1 SV=4	0,00674974039460021	2	2	1	4	1	1	358	38,845	7,718989610672	1	5,77	not found	found
P03905	NADH-ubiquinone oxidoreductase chain 4 OS=Homo sapiens GN=MT-ND4 PE=1 SV=1	0	5	5	2	4	2	1	459	51,547	7	2	9,35	not found	found
Q8TAA3	Proteasome subunit alpha type-7-like OS=Homo sapiens GN=PSMA8 PE=2 SV=3	0,00358521787093216	2	4,296875	1	4	1	1	256	28,512	0	1	8,98	not found	found
P50395	Rab GDP dissociation inhibitor beta OS=Homo sapiens GN=GDI2 PE=1 SV=2	0	10,023388401632	11	4	5	4	1	445	50,631	3	4	6,47	not found	found
P62316	Small nuclear ribonucleoprotein Sm D2 OS=Homo sapiens GN=SNRPD2 PE=1 SV=1	0	5	14,406779661017	2	6	2	1	118	13,518	1,6434051990509	2	9,91	not found	found
Q99536	Synaptic vesicle membrane protein VAT-1 homolog OS=Homo sapiens GN=VAT1 PE=1 SV=2	0	6	7	2	4	2	1	393	41,893	4	2	6,29	not found	found
P10599	Thioredoxin OS=Homo sapiens GN=TXN PE=1 SV=3	0	6	20,952380952381	2	7	2	1	105	11,73	5	2	4,92	not found	found
Q9P035	Very-long-chain (3R)-3-hydroxyacyl-CoA dehydratase 3 OS=Homo sapiens GN=HACD3 PE=1 SV=2	0	5	9	2	4	2	1	362	43,132	0	2	8,94	not found	found
Q15942	Zyxin OS=Homo sapiens GN=ZYX PE=1 SV=1	0,000656167979002625	3	2,0979020979021	1	4	1	1	572	61,238	6,6274049282074	1	6,67	not found	found
P09525	Annexin A4 OS=Homo sapiens GN=ANXA4 PE=1 SV=4	0	17	23	6	14	6	1	319	35,86	8	6	6,13	not found	found
P31939	Bifunctional purine biosynthesis protein PURH OS=Homo sapiens GN=ATIC PE=1 SV=3	0	15	10	5	10	5	1	592	64,575	6	5	6,71	not found	found
P31944	Caspase-14 OS=Homo sapiens GN=CASP14 PE=1 SV=2	0,00358521787093216	2	3	1	5	1	1	242	27,662	1	1	5,58	not found	found
sp	Cathepsin D OS=Homo sapiens GN=CTSD PE=1 SV=1	0	7	7	3	7	3	1	412	44,524	0	3	6,54	not found	found
O60869	Endothelial differentiation-related factor 1 OS=Homo sapiens GN=EDF1 PE=1 SV=1	0	8	18	2	9	2	1	148	16,359	2	2	9,95	not found	found
P06730-2	Isoform 2 of Eukaryotic translation initiation factor 4E OS=Homo sapiens GN=EIF4E	0,00358521787093216	2	3,2258064516129	1	5	1	1	248	28,76	7	1	6,42	not found	found
Q8N684-3	Isoform 3 of Cleavage and polyadenylation specificity factor subunit 7 OS=Homo sapiens GN=CPSF7	0	7	4	2	5	2	1	514	56,341	9,6514573097229	2	8,87	not found	found
Q05682-4	Isoform 4 of Caldesmon OS=Homo sapiens GN=CALD1	0	12,399430195463	8	4	10	4	1	538	62,626	10	4	6,37	not found	found
Q9Y617	Phosphoserine aminotransferase OS=Homo sapiens GN=PSAT1 PE=1 SV=2	0	22	21	7	14	7	1	370	40,397	11,999042391777	7	7,66	not found	found
P06454	Prothymosin alpha OS=Homo sapiens GN=PTMA PE=1 SV=2	0	7	12	2	6	2	1	111	12,196	6,1860169172287	2	3,78	not found	found
P00491	Purine nucleoside phosphorylase OS=Homo sapiens GN=PNP PE=1 SV=2	0	4	6	2	5	2	1	289	32,097	10	2	6,95	not found	found
Q9H0U4	Ras-related protein Rab-1B OS=Homo sapiens GN=RAB1B PE=1 SV=1	0	18	36,318407960199	6	57	2	1	201	22,157	35,057341337204	6	5,73	not found	found
P62140	Serine/threonine-protein phosphatase PP1-beta catalytic subunit OS=Homo sapiens GN=PPP1CB PE=1 SV=3	0	15	18,960244648318	5	23	1	1	327	37,163	5	5	6,19	not found	found
Q9H3N1	Thioredoxin-related transmembrane protein 1 OS=Homo sapiens GN=TMX1 PE=1 SV=1	0	6	11	3	5	3	1	280	31,771	1	3	4,98	not found	found
Q9BVC6	Transmembrane protein 109 OS=Homo sapiens GN=TMEM109 PE=1 SV=1	0,00358521787093216	2	4	1	5	1	1	243	26,194	0	1	10,48	not found	found
A6NHL2	Tubulin alpha chain-like 3 OS=Homo sapiens GN=TUBAL3 PE=1 SV=2	0	16	10	5	41	1	1	446	49,877	79,006769657135	5	6,05	not found	found
P09936	Ubiquitin carboxyl-terminal hydrolase isozyme L1 OS=Homo sapiens GN=UCHL1 PE=1 SV=2	0	7	26	3	5	3	1	223	24,808	6	3	5,48	not found	found
Q15043	Zinc transporter ZIP14 OS=Homo sapiens GN=SLC39A14 PE=1 SV=3	0	4	4	2	5	2	1	492	54,177	1	2	5,33	not found	found
P30050	60S ribosomal protein L12 OS=Homo sapiens GN=RPL12 PE=1 SV=1	0	10,664158221723	35	4	11	4	1	165	17,808	9	4	9,42	not found	found
P53999	Activated RNA polymerase II transcriptional coactivator p15 OS=Homo sapiens GN=SUB1 PE=1 SV=3	0	12	37,007874015748	4	17	4	1	127	14,386	15,361016869545	4	9,6	not found	found
P31943	Heterogeneous nuclear ribonucleoprotein H OS=Homo sapiens GN=HNRNPH1 PE=1 SV=4	0	25	19	7	53	2	1	449	49,198	33	7	6,3	not found	found
Q04695	Keratin, type I cytoskeletal 17 OS=Homo sapiens GN=KRT17 PE=1 SV=2	0	22	15	8	45	3	1	432	48,076	57	8	5,02	not found	found
P48668	Keratin, type II cytoskeletal 6C OS=Homo sapiens GN=KRT6C PE=1 SV=3	0	71	41	23	118	10	1	564	59,988	148	23	8	not found	found
P05109	Protein S100-A8 OS=Homo sapiens GN=S100A8 PE=1 SV=1	0,000656167979002625	3	11	1	6	1	1	93	10,828	0	1	7,03	not found	found
P31153	S-adenosylmethionine synthase isoform type-2 OS=Homo sapiens GN=MAT2A PE=1 SV=1	0	8	8	3	6	3	1	395	43,633	5	3	6,48	not found	found
P37837	Transaldolase OS=Homo sapiens GN=TALDO1 PE=1 SV=2	0,000656167979002625	3	2	1	6	1	1	337	37,516	5	1	6,81	not found	found
P08621	U1 small nuclear ribonucleoprotein 70 kDa OS=Homo sapiens GN=SNRNP70 PE=1 SV=2	0,000656167979002625	3	2	1	6	1	1	437	51,526	5	1	9,94	not found	found
Q96KP4	Cytosolic non-specific dipeptidase OS=Homo sapiens GN=CNDP2 PE=1 SV=2	0	12	12	5	10	5	1	475	52,845	0	5	5,97	not found	found
O00410-3	Isoform 3 of Importin-5 OS=Homo sapiens GN=IPO5	0	11	3	4	11	4	1	1115	125,464	5	4	4,92	not found	found
P49257	Protein ERGIC-53 OS=Homo sapiens GN=LMAN1 PE=1 SV=2	0	7	5	3	12	3	1	510	57,513	8	3	6,77	not found	found
P62906	60S ribosomal protein L10a OS=Homo sapiens GN=RPL10A PE=1 SV=2	0	5,2558766987483	9	2	10	2	1	217	24,816	0	2	9,94	not found	found
