# Supplementary material for: Modelling premature cardiac aging with induced pluripotent stem cells from a hutchinson-gilford Progeria Syndrome patient
Source: Front Physiol. 2022 Nov 23;13:1007418. doi: 10.3389/fphys.2022.1007418 (PMC9726722; doi:10.3389/fphys.2022.1007418)
Supplement: Supplementary file 2 [file Table3.XLSX]

## Sheet: Planilha1
Supplementary table 2. Differently expressed proteins in the iPS derived cardiomyocytes by LC-MS/MS
Significant	- LOG (P-value)	Difference	Description	ctrl-1_a	ctrl-1_b	ctrl-1_c	ctrl-2_a	ctrl-2_b	ctrl-2_c	ctrl-3_a	ctrl-3_b	ctrl-3_c	prog-1_a	prog-1_b	prog-1_c	prog-2_a	prog-2_b	prog-2_c	prog-3_a	prog-3_b	prog-3_c
+	3.0429	3.70711	Serpin H1 OS=Homo sapiens GN=SERPINH1 PE=1 SV=2	-3.1028	-2.90678	-2.72054	-2.52937	1.6495	0.449308	-2.18668	2.1343	-2.70648	4.51457	3.94084	3.37255	2.22882	2.76445	3.89311	0.367731	0.442518	-0.0801697
+	2.14668	3.47478	Isoform 2 of Heterogeneous nuclear ribonucleoprotein K OS=Homo sapiens GN=HNRNPK	3.67519	3.56715	-1.03395	-2.45398	-2.72355	-4.70044	-3.41039	-3.53114	-3.96041	0.652075	0.920565	0.237038	2.07682	1.94342	2.4557	4.34501	2.68038	1.39046
+	3.77339	3.14032	Ubiquitin-40S ribosomal protein S27a OS=Homo sapiens GN=RPS27A PE=1 SV=2	1.21576	-2.96868	-1.86115	-1.48543	-3.12774	-2.60131	-1.19794	-1.27009	1.89308	1.77761	2.21501	2.8365	0.33985	0.843882	2.15614	1.82716	2.35845	2.50479
+	3.99641	2.98752	Polyadenylate-binding protein 1 OS=Homo sapiens GN=PABPC1 PE=1 SV=2	-3.64352	-2.12853	-2.18093	-1	-1.08746	-1.11548	-0.761841	-3.29459	-3.11608	2.38904	-0.283794	1.05062	1.40939	2.03653	2.08019	0.853159	-1.93636	0.960472
+	3.25978	2.8679	60S ribosomal protein L36 OS=Homo sapiens GN=RPL36 PE=1 SV=3	0.150171	-3.83002	-4.10434	-3.30367	-1.3505	-2.88427	0.621489	-1.27009	-1.72086	-0.932886	0.099535	1.8365	0.0874634	2.35845	1.91513	0.331205	1.32931	1.09433
+	2.29894	2.7188	40S ribosomal protein S28 OS=Homo sapiens GN=RPS28 PE=1 SV=1	-3.03007	-2.13398	-2.74856	-1.48543	-2.21299	-3.57714	-2.91047	-2.44594	-2.7518	4.45317	1.25873	1.97401	0.426266	-2.3871	1.72872	-1.67288	-2.44553	-2.16257
+	2.32592	2.62513	Keratin, type II cytoskeletal 5 OS=Homo sapiens GN=KRT5 PE=1 SV=3	-2.89057	-2.84422	-2.14367	-3.35366	-2.04357	-1.55732	-2.3936	-0.83399	-2.26139	1.75743	2.21501	1.49643	-2.81208	-2.36037	-2.79435	1.95269	1.73697	2.11247
+	3.26855	2.58001	60S ribosomal protein L10a OS=Homo sapiens GN=RPL10A PE=1 SV=2	-2.87909	-2.87456	-2.64998	-2.95779	-2.74822	-2.97384	-2.63305	-1.86927	-2.55223	-2.90663	-0.347923	1.05062	-2.53	0.943417	2.57118	1.02308	-0.156118	-0.565597
+	2.41823	2.56126	40S ribosomal protein S26 OS=Homo sapiens GN=RPS26 PE=1 SV=3	-2.49154	-3.13715	-2.53391	-2.7818	-1.3857	-2.47255	-2.12926	-3.15056	-2.86934	-2.62865	-1.92056	-2.34539	0.906891	2.12399	2.87074	1.82716	1.31451	-2.04916
+	3.63686	2.31891	Membrane-associated progesterone receptor component 1 OS=Homo sapiens GN=PGRMC1 PE=1 SV=3	-2.83851	-2.45467	-0.841303	-2.84266	-2.7826	-2.65603	-2.60982	-2.71977	-3.27885	-0.14439	-1.48543	-1.97954	0.409391	-1.8922	1.82494	-0.199308	0.521954	0.790546
+	2.18271	2.3089	High mobility group protein B1 OS=Homo sapiens GN=HMGB1 PE=1 SV=3	-3.57449	-2.36531	-2.51946	-1.71989	-2.32806	-3.12376	0.780687	-1.65711	0.893084	1.75743	3.03813	1.19264	0.228819	-1.62982	1.11867	-0.0473061	1.26919	-1.76197
+	2.82342	2.27598	Isoform 4 of 4F2 cell-surface antigen heavy chain OS=Homo sapiens GN=SLC3A2	-1.44073	-2.46174	-2.46757	-3.17386	-2.15269	-2.08471	0.269186	-0.0721493	0.296982	2	1.97401	2.09953	-1.67854	1.12399	0.77763	0.630766	0.269186	0
+	2.17048	2.2569	Isoform 2 of Transketolase OS=Homo sapiens GN=TKT	-2.7988	-2.51219	-2.32823	-1	-0.86507	-1.61298	-2.85567	-2.87012	-2.16082	-0.0703907	2.8365	3.15843	0.781361	0.0365257	0.958202	-1.88381	-2.16156	-2.34702
+	3.07141	2.2338	Activated RNA polymerase II transcriptional coactivator p15 OS=Homo sapiens GN=SUB1 PE=1 SV=3	-2.94224	-3.51663	-1.62914	-3.36915	-2.77829	-2.87718	-3.26274	-2.47994	-2.37441	1.60768	1.14684	-0.559427	-3.26253	-2.10245	-1.42052	-0.561878	0.106916	-0.0801697
+	3.4711	2.2255	Protein ERGIC-53 OS=Homo sapiens GN=LMAN1 PE=1 SV=2	-2.27492	-2.73586	-2.81837	-3.08685	-3.07641	-2.99125	-2.50933	-2.23764	-2.879	-2.07039	-0.63743	-1.10692	-2.03934	-2.32866	1.11867	0.827164	0.736965	0.91983
+	2.94689	2.20679	Heat shock 70 kDa protein 1B OS=Homo sapiens GN=HSPA1B PE=1 SV=1	-2.714	-3.18968	-2.7549	0.123383	-2.51562	-1.24101	-2.06185	-3.04341	-2.02018	-0.304855	-2.50919	-0.559427	1.22882	-0.893084	-0.184402	0.903784	1.49596	1.26628
+	3.46882	2.19228	Filamin-A OS=Homo sapiens GN=FLNA PE=1 SV=4	0.630796	-0.880306	-2.6423	-0.853159	-0.628033	0.387024	-2.56607	-3.02738	-1.72358	2.05063	1.16992	0.584963	1.02237	1.42884	0.571178	0.505236	0	1.09433
+	2.82051	2.17285	Keratin, type I cytoskeletal 17 OS=Homo sapiens GN=KRT17 PE=1 SV=2	-2.44381	-3.18503	-2.00965	-3.15902	-3.50785	-3.89642	-2.54272	-1.59282	-2.87338	0.36257	0.747232	0	-2.04409	-2.63312	-3.19079	0.746243	0.17403	0.182865
+	3.14841	2.15295	60S ribosomal protein L7 OS=Homo sapiens GN=RPL7 PE=1 SV=1	-1.18863	-1.88031	-0.381872	1.8365	0.882162	0.13245	-1.82845	-0.898119	-2.24471	1.96523	0.146841	1.47805	2.12928	0.843882	1.67809	2.45519	1.94342	1.16559
+	2.73755	2.14703	6-phosphogluconate dehydrogenase, decarboxylating OS=Homo sapiens GN=PGD PE=1 SV=3	-3.05582	-3.15423	-1.9358	0.342392	-2.17129	-3.29771	-1.98991	-2.84487	-3.16383	-0.304855	-0.719893	0.146841	1.22882	-0.308123	0.571178	0.215729	0.521954	-3.29942
+	2.88621	2.10287	Keratin, type II cytoskeletal 6C OS=Homo sapiens GN=KRT6C PE=1 SV=3	-3.42787	-2.50316	-2.04945	-3.36786	-1.99077	-2.58374	-2.63709	-2.80358	-2.53502	1.71621	1.14684	0.0506248	-2.62546	-2.54624	-1.60631	-1.25376	0.106916	0.038475
+	2.1866	2.07728	ADP-ribosylation factor 3 OS=Homo sapiens GN=ARF3 PE=1 SV=2	-2.05337	-2.93052	-2.95595	-3.10603	-3.02759	-3.23183	-2.1143	-2.59463	-1.42884	-3.33686	-0.719893	-0.106916	-2.61927	1.12399	1.91513	1.48875	-2.37048	-0.12199
+	2.76441	2.0216	Adipocyte plasma membrane-associated protein OS=Homo sapiens GN=APMAP PE=1 SV=2	-2.13658	-3.42537	-2.92155	-2.89911	-2.58311	-3.08833	-3.13362	-2.93645	-2.86625	-2.60223	-2.96634	-2.47291	-1.62348	0.736965	-0.6963	0.600391	0.415037	0.812914
+	2.4677	1.99914	Surfeit locus protein 4 OS=Homo sapiens GN=SURF4 PE=1 SV=3	-3.04368	-2.94303	-1.61891	-3.05339	-2.64932	-3.48845	-2.5664	1.2863	-2.65466	-1.2713	0.0506248	0.0506248	-2.31585	0.106916	0.330172	0.505236	-0.893084	0.697437
+	2.23758	1.98644	Ras-related protein Rab-11B OS=Homo sapiens GN=RAB11B PE=1 SV=4	-3.09917	-3.17261	0.21759	-2.40037	-2.65588	-3.21156	0.645336	-1.8846	-2.4337	-0.222393	-0.900465	-0.63743	0.584963	1.89451	1.72872	-1.63227	-0.530514	-0.402098
+	2.31235	1.96949	Ras-related protein Rab-2A OS=Homo sapiens GN=RAB2A PE=1 SV=1	-2.83321	-3.19108	-2.34556	-2.69904	-2.60282	-2.66903	-2.18263	-1.65711	-1.65159	-2.01211	-1.48543	-2.70171	1.90689	0.943417	1.4557	-0.146841	0.299561	-2.36614
+	2.96455	1.93631	Protein disulfide-isomerase A3 OS=Homo sapiens GN=PDIA3 PE=1 SV=4	-1.2317	-2.93917	-2.50821	-0.762962	-1.02857	-0.530514	-1.85637	0.397337	1.02046	0.192644	0.747232	0.514572	0.523562	1.99072	1.77763	0	1.49596	0.744743
+	3.54179	1.90149	Probable ATP-dependent RNA helicase DDX5 OS=Homo sapiens GN=DDX5 PE=1 SV=1	-0.721506	-3.17287	-0.426266	-2.88874	-2.01366	-3.19106	-2.68999	-2.72172	-1.69001	0.36257	-1.10692	1.02553	0.228819	-0.285402	-0.451189	-0.784271	-0.641546	-0.750021
+	2.30173	1.898	Myosin regulatory light chain 12B OS=Homo sapiens GN=MYL12B PE=1 SV=2	-2.65365	-3.01225	0.895662	-2.33356	-3.07114	-3.53959	-2.41539	-2.61704	-2.12498	-0.304855	-0.63743	-1.34792	-2.93716	0.495958	1.04066	-0.0473061	0.572578	-0.624491
+	2.38	1.88639	Dolichyl-diphosphooligosaccharide--protein glycosyltransferase subunit DAD1 OS=Homo sapiens GN=DAD1 PE=1 SV=3	-3.09131	-2.57337	-2.26335	-0.853159	-3.0646	-3.32081	-2.34448	-2.73446	-3.08495	-0.222393	-0.222393	0.0506248	-2.0412	-2.98006	-2.90515	0.952694	0.469486	0.545435
+	2.74351	1.85814	Isoform 2 of Annexin A2 OS=Homo sapiens GN=ANXA2	-1.41811	-0.432848	-1.17834	-0.38109	-0.765535	-2.31358	0.668795	1.24236	0.728697	0.192644	0.0506248	0.807354	1.78136	2.91917	2.3943	1.29373	1.73697	1.69744
+	2.2765	1.73315	Multifunctional protein ADE2 OS=Homo sapiens GN=PAICS PE=1 SV=3	-2.235	-2.25228	-2.3388	-3.49561	-4.04016	-0.415037	-2.27106	-2.33876	-0.321928	0.415037	0.716206	0.237038	-2.90384	-0.670692	-0.076149	-0.369234	-0.641546	-0.817135
+	2.62781	1.71576	Cyclin-dependent kinase 1 OS=Homo sapiens GN=CDK1 PE=1 SV=3	-2.76599	-2.11673	-0.966833	-2.73756	-0.502501	-3.06377	-2.79831	-0.602663	-2.43631	-1.14439	-1.48543	-0.807356	0.906891	0.736965	1.26306	-0.430636	-0.963474	-0.624491
+	3.11762	1.51803	Cytosolic non-specific dipeptidase OS=Homo sapiens GN=CNDP2 PE=1 SV=2	-2.79533	-2.32203	-2.59775	-2.28009	-2.7127	-2.86141	-2.33147	-2.88793	-3.04272	0	-1	-0.900465	-2.55794	-0.197939	-0.076149	-1.36923	-3.0279	-1.03953
+	2.89311	1.4762	Annexin A1 OS=Homo sapiens GN=ANXA1 PE=1 SV=2	-3.11234	-2.60923	-2.06546	-3.22957	-3.1173	-3.03522	-1.19794	-0.713696	-2.51927	-1.07039	-1.68634	-2.17855	-0.790546	-0.530514	-0.451189	0.133266	-0.700439	-1.03953
+	2.76051	1.37843	Purine nucleoside phosphorylase OS=Homo sapiens GN=PNP PE=1 SV=2	-3.40624	-2.37835	-2.69451	-3.13272	-2.35672	-2.089	-2.50898	-2.44372	-3.20957	-2.60055	-0.63743	-0.719893	-0.508146	-0.793549	0.148724	-2.27671	-2.21336	-2.21303
+	4.47924	1.05555	Isoform 3 of Importin-5 OS=Homo sapiens GN=IPO5	-2.72119	-3.0786	-2.91228	-2.92458	-2.38002	-3.09364	-2.63674	-3.16276	-2.6249	-1.8316	-1.22239	-1.52937	-1.75207	-1.82597	-2.12926	-1.36923	-2.86583	-1.50901
+	3.07758	0.972476	Isoform 2 of E3 ubiquitin-protein ligase RNF213 OS=Homo sapiens GN=RNF213	-3.79913	-3.70109	-2.94561	-2.97105	-2.61362	-3.35041	-3.49896	-3.07665	-3.76939	-2.49389	-1.50734	-2.41881	-1.67807	-2.46231	-3.23761	-3.03931	-2.01701	-2.11927
+	2.91508	-1.81889	Basement membrane-specific heparan sulfate proteoglycan core protein OS=Homo sapiens GN=HSPG2 PE=1 SV=4	-0.210005	0.467617	0.821663	0.0506248	0.108934	-0.0857296	-2.28514	-2.20905	-2.78152	-2.84813	-2.9656	-2.65511	-2.71286	-2.2854	-1.99176	-2.13164	-2.45282	-2.44934
+	2.97067	-1.92326	Isoform 2 of Obscurin OS=Homo sapiens GN=OBSCN	0.367762	-0.339739	1.21759	0.459431	0.0280132	-0.145851	-2.46579	-2.00328	-2.79002	-2.56655	-2.65812	-2.2535	-2.23533	-2.45454	-2.49436	-2.70931	-2.52805	-3.08151
+	2.53039	-2.02142	Isocitrate dehydrogenase [NAD] subunit alpha, mitochondrial OS=Homo sapiens GN=IDH3A PE=1 SV=1	1.6308	0.214849	1.80255	0.342392	2.73697	1.42884	2.49596	1.77173	-0.0848904	-2.68995	-2.66637	-1.98772	0.906891	0.269186	0.455702	-0.253758	0.415037	-0.302563
+	2.20389	-2.15767	Succinate--CoA ligase [ADP-forming] subunit beta, mitochondrial OS=Homo sapiens GN=SUCLA2 PE=1 SV=3	1.29376	1.136	1.80255	1.90689	2.85895	2.70895	1.35845	1.42381	1.28011	-2.49305	-1.96625	-1.96654	-3.01305	1.89451	1.87074	0.878693	1.10692	0.038475
+	2.19714	-2.15781	Collagen alpha-1(IV) chain OS=Homo sapiens GN=COL4A1 PE=1 SV=3	1.74627	1.30412	0.618128	1.09953	0.575502	-0.530514	-2.17377	-2.63432	-2.87647	-2.828	-3.10242	-2.54039	-3.5679	-0.156118	-1.80733	-2.37129	-2.80822	-3.11019
+	2.25663	-2.17609	Cytochrome b-c1 complex subunit 1, mitochondrial OS=Homo sapiens GN=UQCRC1 PE=1 SV=3	0.00930786	1.56715	1.5961	0.532494	1.81943	0.584963	-2.81857	1.54934	0.728697	-3.3826	-2.76169	-2.86537	-0.540567	0.299561	0.330172	-1.72154	-2.74935	-0.624491
+	3.13387	-2.49	Isoform M1 of Pyruvate kinase PKM OS=Homo sapiens GN=PKM	1.04583	1.18382	1.11289	1.21501	-0.971987	0.0274811	-2.32078	-2.44216	-2.83361	-2.87845	-2.95819	-2.71055	-2.47915	-3.52645	-2.68512	-3.67578	-3.33179	-2.14803
+	2.26902	-2.6566	Isoform Delta 11 of Calcium/calmodulin-dependent protein kinase type II subunit delta OS=Homo sapiens GN=CAMK2D	0.0989456	2.06965	2.41922	1.7625	-1.28011	0.509014	-2.4175	-2.404	-3.6172	-2.76172	-2.67595	-2.77324	-2.26077	-5.90689	-2.84597	-2.8961	-2.3081	-2.34014
+	4.2083	-2.69155	Fibrillin-2 OS=Homo sapiens GN=FBN2 PE=1 SV=3	2.97657	1.30412	2.48062	0.652077	0.819427	0.321928	-0.285402	-0.187626	0.118645	-3.13301	-2.98362	-2.83584	-0.790546	-1.37851	-1.49699	-1.75573	-0.963474	-0.685892
+	2.57086	-2.72631	Isoform 12 of Titin OS=Homo sapiens GN=TTN	1.5694	1.44162	1.80255	2.03813	1.81943	1.70895	-0.0759487	-2.35315	-2.51942	-3.17593	-3.33325	-2.95386	0.781361	-1	-0.991756	-2.65638	-3.06967	-2.7057
+	2.11025	-2.87652	Myosin regulatory light chain 2, atrial isoform OS=Homo sapiens GN=MYL7 PE=1 SV=1	-2.57665	3.65462	0.527931	2.51457	2.40439	2.94342	2.42884	2.3567	-2.43244	-2.7238	-1.986	-2.91448	-1.29956	-2.76439	-2.09932	-2.61067	0.758991	1.57191
