# Supplementary material for: Modelling premature cardiac aging with induced pluripotent stem cells from a hutchinson-gilford Progeria Syndrome patient
Source: Front Physiol. 2022 Nov 23;13:1007418. doi: 10.3389/fphys.2022.1007418 (PMC9726722; doi:10.3389/fphys.2022.1007418)
Supplement: Supplementary file 3 [file Table4.XLSX]

## Sheet: Sheet1
#pathway ID	pathway description	observed gene count	false discovery rate	matching proteins in your network (IDs)	matching proteins in your network (labels)
Up-regulated
3010	Ribosome	5	0.000945	ENSP00000252543,ENSP00000339795,ENSP00000348849,ENSP00000363018,ENSP00000472469	RPL10A,RPL36,RPL7,RPS26,RPS28
Down-regulated
1200	Carbon metabolism	3	0.00735	ENSP00000299518,ENSP00000320171,ENSP00000367923	IDH3A,PKM,SUCLA2
20	Citrate cycle (TCA cycle)	2	0.017	ENSP00000299518,ENSP00000367923	IDH3A,SUCLA2
4510	Focal adhesion	3	0.0176	ENSP00000223364,ENSP00000327145,ENSP00000364979	COL4A1,FLNC,MYL7
5205	Proteoglycans in cancer	3	0.0176	ENSP00000327145,ENSP00000339740,ENSP00000363827	CAMK2D,FLNC,HSPG2
1230	Biosynthesis of amino acids	2	0.0428	ENSP00000299518,ENSP00000320171	IDH3A,PKM
