# Supplementary material for: Modelling premature cardiac aging with induced pluripotent stem cells from a hutchinson-gilford Progeria Syndrome patient
Source: Front Physiol. 2022 Nov 23;13:1007418. doi: 10.3389/fphys.2022.1007418 (PMC9726722; doi:10.3389/fphys.2022.1007418)
Supplement: Supplementary file 4 [file Table1.XLSX]

## Sheet: Sheet1
	CM-Control	CM-Prog
RMP (mV)	- 57.7 ± 2.8	- 50 ± 2.2
APA (mV)	83.5 ± 3.0	84.1 ± 4.5
Max dV/dt (mV/s)	11862 ± 690.3	13715.2 ± 1599.6
MaxNegSlope (mV/s)	1603.4 ± 67.1	1387.7 ± 147.7
RMP : Resting membrane Potential; APA: Action Potential Amplitude; Max dV/dt: maximal upstroke velocity; MaxNegSlope: maximum negative slope. Data are presented in mean ± SEM.
